# Supplementary material for: Production of a β-Glucosidase-Rich Cocktail from Talaromyces amestolkiae Using Raw Glycerol: Its Role for Lignocellulose Waste Valorization
Source: MDPI journal article supplement (doi:10.3390/jof7050363), 2021-05-06
Supplement: s1 [file s1]

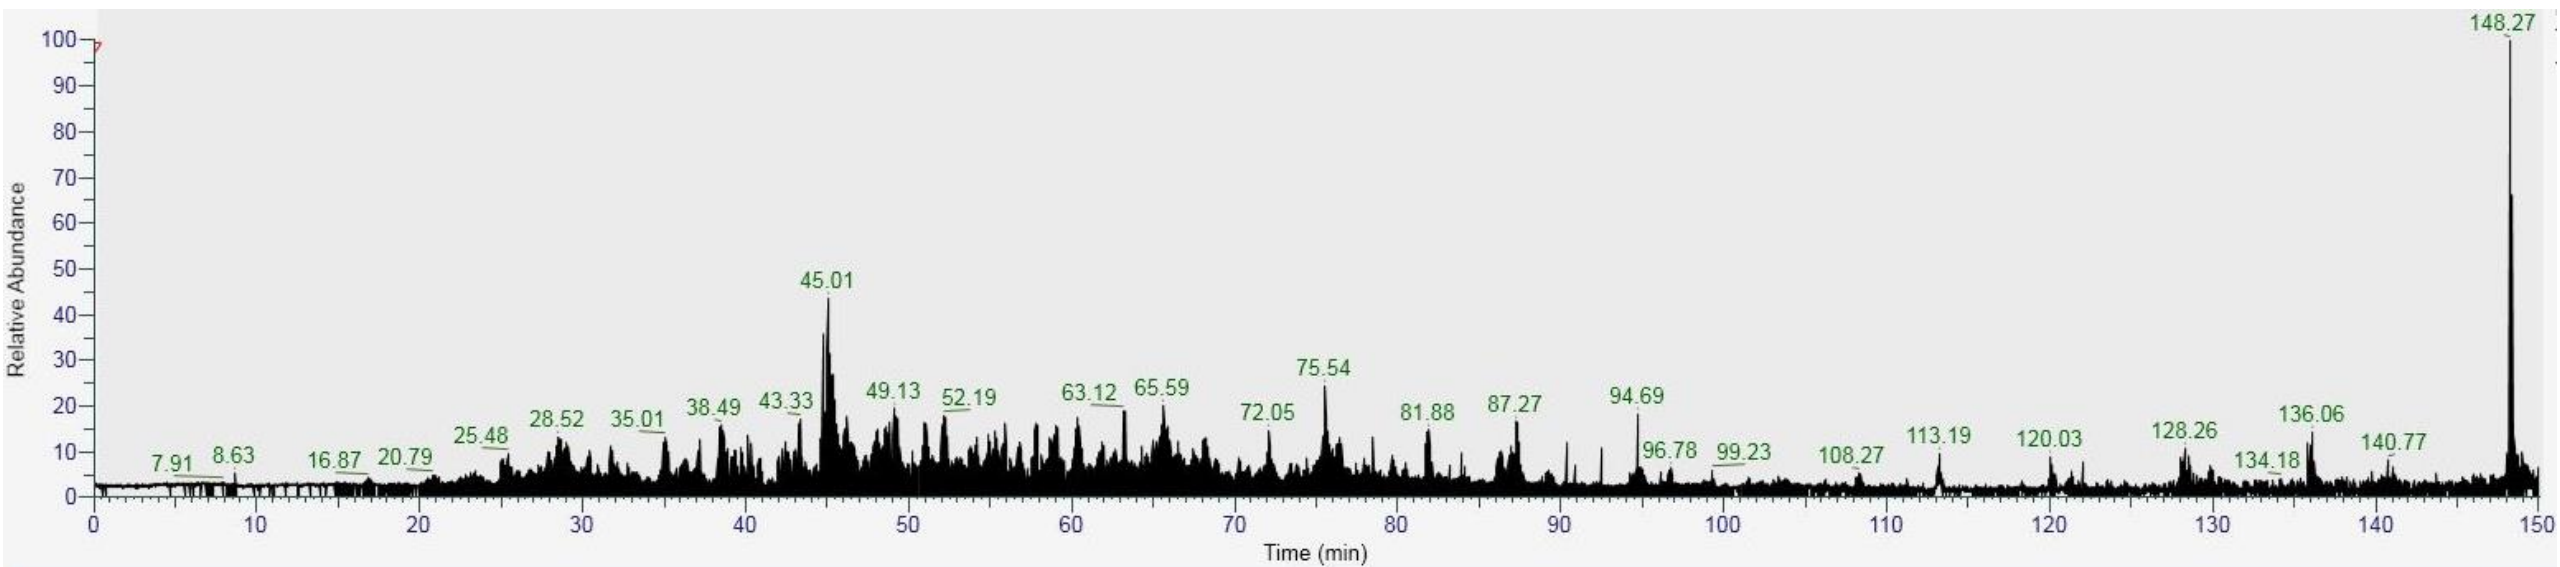

Figure S1. TIC (Total Ion Chromatogram) of *T. amestolkiae* culture supernatant growing in 1% glycerol as carbon source analyzed by nanoHPLC-MS/MS.

**Table S1. Detected proteins in the secretome of *T. amestolkiae* cultures, induced with 1% of glycerin as carbon source.**

| ID     | PSM  | Predicted protein function                      | GH family |
|--------|------|-------------------------------------------------|-----------|
| g377   | 7.09 | beta-glucosidase                                | GH3       |
| g3995  | 6.47 | glutaminase                                     |           |
| g8295  | 3.59 | alpha-glucosidase                               | GH31      |
| g2158  | 3.28 | glucoamylase                                    | GH15      |
| g9324  | 3.18 | Exo-beta-1,3-glucanase                          | GH55      |
| g2140  | 2.50 | glucoamylase                                    | GH15      |
| g5915  | 2.23 | non-reducing end $\beta$ -L-arabinofuranosidase | GH127     |
| g4076  | 2.00 | hexosaminidase                                  | GH20      |
| g216   | 1.77 | neutral/alkaline nonlysosomal ceramidase        |           |
| g9148  | 1.58 | catalase                                        |           |
| g9150  | 1.54 | beta-glucosidase                                | GH3       |
| g4965  | 1.52 | Thioredoxin reductase                           |           |
| g6145  | 1.49 | alpha-1,2-mannosidase                           | GH92      |
| g6554  | 1.39 | mutanase                                        | GH71      |
| g4603  | 1.36 | beta-galactosidase                              | GH35      |
| g9290  | 1.33 | alpha-glucosidase                               | GH31      |
| g3307  | 1.29 | hypothetical protein                            |           |
| g6658  | 1.20 | hypothetical protein                            | GH125     |
| g3385  | 1.18 | chitinase                                       | GH18      |
| g4355  | 1.12 | manganese peroxidase                            | GT2       |
| g10182 | 1.10 | endo-1,3-beta-glucosidase                       | GH17      |
| g3279  | 1.09 | alpha amylase                                   | GH13      |
| g4633  | 1.08 | alpha-1,2-Mannosidase                           | GH47      |
| g3185  | 1.07 | [N-glycan] $\alpha$ -1,3-mannosidase            | GH92      |
| g3077  | 1.05 | Exo-beta-1,3-glucanase                          | GH55      |
| g608   | 1.05 | 1,3-beta-glucanosyltransferase                  | GH72      |
| g3149  | 1.03 | beta-mannosidase                                | GH2       |
| g7301  | 0.96 | aminopeptidase                                  |           |
| g3202  | 0.94 | cathepsin                                       |           |
| g1180  | 0.92 | Exo-beta-D-glucosaminidase                      | GH2       |
| g7148  | 0.86 | Xaa-Pro dipeptidase                             |           |
| g8384  | 0.85 | $\beta$ -glucosidase                            | GH1       |
| g8260  | 0.81 | endo-inulinase precursor                        | GH32      |
| g6857  | 0.79 | beta-glucosidase                                | GH3       |
| g10153 | 0.79 | Isoamyl alcohol oxidase, putative               | AA7       |
| g5548  | 0.79 | alpha-rhamnosidase                              | GH78      |
| g2384  | 0.78 | alpha-galactosidase                             | GH27      |
| g4362  | 0.77 | cathepsin                                       |           |
| g8428  | 0.77 | Glucan endo-1,3-beta-glucosidase                | GH55      |
| g2159  | 0.76 | alpha-amylase                                   | GH13      |
| g10298 | 0.75 | hypothetical protein                            |           |
| g2234  | 0.73 | cellobiohydrolase                               | GH7       |
| g6228  | 0.71 | amine oxidase                                   |           |
| g4013  | 0.70 | hypothetical protein                            |           |
| g4461  | 0.69 | alpha-fucosidase                                | GH95      |
| g571   | 0.69 | hypothetical protein                            |           |

|        |      |                                            |       |
|--------|------|--------------------------------------------|-------|
| g10078 | 0.69 | endo-1,3(4)-beta-glucanase, putative       | GH81  |
| g881   | 0.63 | aldose-1-epimerase                         |       |
| g7294  | 0.62 | hypothetical protein                       |       |
| g2392  | 0.61 | hypothetical protein                       |       |
| g9312  | 0.59 | arabinofuranosidase                        | GH54  |
| g7641  | 0.58 | beta-glucanosyltransferase                 | GH72  |
| g4318  | 0.56 | peroxidase                                 | AA2   |
| g7147  | 0.56 | leucyl aminopeptidase                      |       |
| g2989  | 0.55 | Extracellular cell wall glucanase          | GH16  |
| g2125  | 0.55 | Alpha-galactosidase                        | GH27  |
| g456   | 0.55 | glutaminase, putative                      |       |
| g8806  | 0.52 | arabinan-endo 1,5-alpha-L-arabinase        | GH43  |
| g1839  | 0.51 | endo-1,3(4)-beta-glucanase, putative       | GH16  |
| g4704  | 0.51 | beta-lactamase                             |       |
| g8103  | 0.50 | tripeptidyl-peptidase                      |       |
| g4745  | 0.50 | Glucan endo-1,3-alpha-glucosidase          | GH71  |
| g8259  | 0.48 | glucoamylase                               | GH15  |
| g9337  | 0.46 | alpha-mannosidase                          | GH92  |
| g3006  | 0.45 | glutathione oxidoreductase                 |       |
| g7811  | 0.45 | 6-phosphogluconolactonase                  |       |
| g3707  | 0.45 | arabinofuranosidase                        | GH62  |
| g7845  | 0.43 | peptidase                                  | CE7   |
| g727   | 0.43 | Endo-beta-1,6-galactanase                  | GH30  |
| g9673  | 0.42 | chitin synthase                            |       |
| g7487  | 0.41 | conidial pigment biosynthesis oxidase      |       |
| g8480  | 0.41 | phosphatase                                |       |
| g4474  | 0.40 | Glucan endo-1,3-alpha-glucosidase          | GH71  |
| g3728  | 0.38 | peptidase                                  |       |
| g1325  | 0.37 | asparaginyl-tRNA synthetase                | GH106 |
| g5215  | 0.36 | glucose-6-phosphate isomerase              |       |
| g3139  | 0.36 | beta-glucosidase                           | GH3   |
| g3187  | 0.36 | FAD/FMN-containing isoamyl alcohol oxidase | AA7   |
| g3993  | 0.36 | protease                                   |       |
| g4148  | 0.36 | Tyrosinase                                 |       |
| g8248  | 0.35 | arabinofuranosidase                        | gh51  |
| g290   | 0.34 | aminotransferase                           |       |
| g7031  | 0.33 | endonuclease                               |       |
| g2149  | 0.33 | transcription factor, putative             |       |
| g5495  | 0.33 | 1,3-beta-glucanosyltransferase             | GH72  |
| g5860  | 0.33 | endoglucanase                              | GH5   |
| g7045  | 0.33 | endo-1,3-beta-glucosidase                  | GH64  |
| g2283  | 0.32 | xylooligosaccharide oxidase                | AA7   |
| g3685  | 0.32 | hypothetical protein                       |       |
| g5245  | 0.31 | serine protease                            |       |
| g7406  | 0.31 | beta galactosidase, putative               | GH35  |
| g1116  | 0.30 | hypothetical protein                       |       |
| g3954  | 0.30 | alpha-fucosidase                           | GH29  |
| g9487  | 0.30 | alpha-L-rhamnosidase                       | GH78  |
| g2465  | 0.29 | transpeptidase                             |       |
| g2794  | 0.29 | hexosaminidase                             | GH20  |
| g4411  | 0.29 | 2,3-dihydroxybenzoate decarboxylase        |       |
| g9063  | 0.29 | chitinase                                  | GH18  |
| g8017  | 0.29 | formate dehydrogenase                      |       |
| g5328  | 0.29 | hypothetical protein                       |       |

|        |      |                                               |      |
|--------|------|-----------------------------------------------|------|
| g7486  | 0.29 | hypothetical protein                          |      |
| g5593  | 0.28 | sexual development protein                    |      |
| g6147  | 0.28 | fumarylacetoacetate hydrolase Fah             |      |
| g7927  | 0.28 | Alpha-L-arabinofuranosidase axhA              | GH62 |
| g10375 | 0.27 | hypothetical protein                          |      |
| g5993  | 0.27 | hypothetical protein                          |      |
| g395   | 0.27 | hypothetical protein                          |      |
| g7627  | 0.26 | Vacuolar aminopeptidase 1                     |      |
| g9490  | 0.25 | hexosaminidase                                | GH3  |
| g3369  | 0.25 | oxidoreductase                                | AA3  |
| g466   | 0.24 | chitinase                                     | GH18 |
| g4882  | 0.24 | alpha-1,2-mannosidase, putative               | GH92 |
| g2143  | 0.24 | Glucose oxidase                               | AA3  |
| g7540  | 0.23 | HypA-like protein, putative                   |      |
| g7482  | 0.23 | Conidial pigment biosynthesis oxidase         | AA1  |
| g5789  | 0.22 | arabinofuranosidase                           | GH54 |
| g6836  | 0.22 | hypothetical protein                          |      |
| g3001  | 0.21 | glucan endo-1,3-beta-glucosidase precursor    | GH64 |
| g1079  | 0.20 | hypothetical protein                          |      |
| g1266  | 0.20 | Alpha-glucosidase, putative                   | GH31 |
| g7206  | 0.20 | glucan 1,3-beta-glucosidase                   | GH5  |
| g10174 | 0.19 | dienelactone hydrolase                        |      |
| g4950  | 0.18 | $\alpha$ -D-xyloside xylohydrolase            | GH31 |
| g6249  | 0.18 | Mannosyl phosphorylinositol ceramide synthase | GT32 |
| g1197  | 0.17 | peptidase                                     |      |
| g3578  | 0.17 | hypothetical protein                          |      |
| g3952  | 0.17 | 2,3-dihydroxybenzoic acid decarboxylase       |      |
| g9061  | 0.17 | alpha-1,3-glucanase                           | GH71 |
| g8069  | 0.14 | actin Act1                                    |      |
| g2575  | 0.13 | protease                                      |      |
| g4734  | 0.13 | hypothetical protein                          |      |
| g4878  | 0.11 | aminotransferase                              |      |
| g5497  | 0.11 | aldehyde dehydrogenase                        |      |
| g5707  | 0.11 | endoglucanase                                 | GH6  |
| g7783  | 0.11 | Putative epoxide hydrolase                    |      |
| g3373  | 0.09 | beta-xylosidase                               | GH39 |
| g5712  | 0.09 | Mannan endo-1,6-alpha-mannosidase DCW1        | GH76 |
| g6753  | 0.09 | beta-glucosidase                              | GH3  |
| g6784  | 0.09 | lipase                                        |      |
| g6921  | 0.09 | arabinofuranosidase                           | GH43 |
| g9076  | 0.09 | feruloyl esterase                             | GH3  |

| A2                                  | Sequence                   | # PSMs | # Proteins | # Protein Groups | Protein Group Accessions |
|-------------------------------------|----------------------------|--------|------------|------------------|--------------------------|
| s detected in the LC-MS/MS analysis |                            | # PSMs |            |                  |                          |
| High                                | VAFTNAAAGTADGDSVGTSGVDLL   | 1      | 1          | 1                | g1197.t1                 |
| High                                | ATAMIAIYANYLIDNSQSSTAK     | 1      | 1          | 1                | g2158.t1                 |
| High                                | DYGAAGDGVTDGTAAINSISGGG    | 3      | 1          | 1                | g9324.t1                 |
| High                                | NVKDYGAAGDGVTDGTAAINSIS    | 6      | 1          | 1                | g9324.t1                 |
| High                                | NWEGFAPDPVLTGQmASTIEGm     | 9      | 1          | 1                | g377.t1                  |
| High                                | EYINVTVIQGISNPSGSLADGTGL   | 9      | 1          | 1                | g2158.t1                 |
| High                                | QTQLAFSEINDQTEYGNWWYATT    | 13     | 1          | 1                | g3995.t1                 |
| High                                | TDASQEQTDVQSFSDmEPIADGFR   | 1      | 1          | 1                | g4318.t1                 |
| High                                | ATAGFTGLGLIDGDQYQSSGNQGV   | 4      | 1          | 1                | g9324.t1                 |
| High                                | GDGSTDDTAIQAISALNSAAASGSI  | 2      | 1          | 1                | g9324.t1                 |
| High                                | TQVPINFASWTLDTYGNEYYYAGE   | 3      | 1          | 1                | g377.t1                  |
| High                                | YDVmVNPDAVDGLANFNWGGNG     | 1      | 1          | 1                | g4076.t1                 |
| High                                | SGKDANTVLASINTFDPQATcDDV   | 7      | 1          | 1                | g2140.t1                 |
| High                                | NVAESDSQITGDLILAGSACnTYGE  | 5      | 1          | 1                | g8295.t1                 |
| High                                | SSDNGIYAIGDANNDGATNVPHAn   | 1      | 1          | 1                | g4965.t1                 |
| High                                | DVYSSAAVGTYASGSTAFTAIISAV  | 4      | 1          | 1                | g2140.t1                 |
| High                                | SQVLDSVNYVLSHQQADGWLGPET   | 11     | 1          | 1                | g5915.t1                 |
| High                                | AFESTSGSISDLYNmVNTVK       | 3      | 1          | 1                | g2159.t1                 |
| High                                | ISVFGNDAADLSGGPYDPSNTNGV   | 2      | 1          | 1                | g9150.t1                 |
| High                                | NWEGFAPDPVLTGQmASTIEGm     | 4      | 1          | 1                | g377.t1                  |
| High                                | DANSLGTHITFDPEAAcDDTTFQF   | 1      | 1          | 1                | g8259.t1                 |
| High                                | LASQTASDGYPWASLcQTDTSWAY   | 2      | 1          | 1                | g3001.t1                 |
| High                                | QVIAPDTPYVATAGPNQLYFIDTR   | 2      | 1          | 1                | g10375.t1                |
| High                                | TLWNTGQAFLPHSNLYGSHPIYIE   | 2      | 1          | 1                | g8295.t1                 |
| High                                | AFLVTGVTGPcVGNIAAIPR       | 2      | 1          | 1                | g9150.t1                 |
| High                                | LGANVDGSWTSFGQQGPImPYDT    | 2      | 1          | 1                | g6228.t1                 |
| High                                | ATAmIAIYANYLIDNSQSSTAK     | 4      | 1          | 1                | g2158.t1                 |
| High                                | DFVDVTGDRFQIVGVYQPGGSS     | 3      | 1          | 1                | g5495.t1                 |
| High                                | YGLGADQVVEWEVIDGTGK        | 1      | 1          | 1                | g3187.t1                 |
| High                                | YDNTLAFFSGNEVINDGPSSK      | 2      | 1          | 1                | g608.t1                  |
| High                                | AIGESSDPEQAASQAGSDAAAALG   | 2      | 1          | 1                | g9490.t1                 |
| High                                | TmDNNAASDALATTcSVAIDK      | 2      | 1          | 1                | g4013.t1                 |
| High                                | NHNLDGFDmDVEENVSESLLR      | 1      | 1          | 1                | g9063.t1                 |
| High                                | NPAGGSGEVVYDASAGVYAR       | 1      | 1          | 1                | g10078.t1                |
| High                                | RISVFGNDAADLSGGPYDPSNTNG   | 1      | 1          | 1                | g9150.t1                 |
| High                                | FADGFIAGFSQSSVGTSPNVLAGA   | 3      | 1          | 1                | g216.t1                  |
| High                                | DGAGQIFIPLNTAAYSPTNLNNGSF  | 2      | 1          | 1                | g9148.t1                 |
| High                                | YVPDGAQDGSPQVNPAGGAPGGI    | 16     | 1          | 1                | g377.t1                  |
| High                                | GAVAPLWSEQVDDTVISGK        | 6      | 1          | 1                | g4076.t1                 |
| High                                | GYTQGGSNADVLIAEAYLK        | 1      | 1          | 1                | g3185.t1                 |
| High                                | SWDWPNIASAGELGFPDALGSS     | 2      | 1          | 1                | g1180.t1                 |
| High                                | ADGSLIGTFVDTIGGVGALDQSPNI  | 2      | 1          | 1                | g466.t1                  |
| High                                | NPLNYFAETEQVmFQPGHIVR      | 2      | 1          | 1                | g9148.t1                 |
| High                                | ITNANPGSSYTYGDNSSGADSIIK   | 2      | 1          | 1                | g2989.t1                 |
| High                                | DDTLTFYLNPGPALVEPSSNTADV   | 1      | 1          | 1                | g7045.t1                 |
| High                                | SVYSLDSGIAEGVAVAVGR        | 6      | 1          | 1                | g2140.t1                 |
| High                                | FATLVYTVHELANNPDLAASLTDLGL | 1      | 1          | 1                | g10078.t1                |
| High                                | LQDGSTNNDPAQDLEFDLFR       | 4      | 1          | 1                | g4965.t1                 |
| High                                | DSALENDLITSSYAQGmANR       | 2      | 1          | 1                | g571.t1                  |
| High                                | DTVNVLIADAGQGAIIYK         | 2      | 1          | 1                | g7486.t1                 |
| High                                | LAPAAAGSEcGVYGNPDQGGQTAV   | 2      | 1          | 1                | g4745.t1                 |
| High                                | VQSDASAIISDNYATLATLALR     | 13     | 1          | 1                | g3995.t1                 |
| High                                | LFGGGHmVPYDQPEASLEFFNR     | 5      | 1          | 1                | g3202.t1                 |
| High                                | HmHDVIGNDGTVPVAVFR         | 5      | 1          | 1                | g4965.t1                 |
| High                                | TYDYIVIGGGSGGSGSAR         | 1      | 1          | 1                | g3006.t1                 |

|      |                           |    |   |   |           |
|------|---------------------------|----|---|---|-----------|
| High | YLGGLLAGYDLLSGPAANLVSDK   | 7  | 1 | 1 | g4633.t1  |
| High | AcQNAETEIPEPTSNFADIQSAAEQ | 1  | 1 | 1 | g4882.t1  |
| High | LVmAPLFENQEAGQYPNR        | 5  | 1 | 1 | g3995.t1  |
| High | YLPLLSGNEGELSAAEGPIR      | 1  | 1 | 1 | g1325.t1  |
| High | QTTLGTETLSLTGEGNPLNR      | 5  | 1 | 1 | g6658.t1  |
| High | ALWVTETGWPVSGDKENLAVASTI  | 2  | 1 | 1 | g10182.t1 |
| High | TSLPSNPNIYGLGEDSDSFK      | 1  | 1 | 1 | g8295.t1  |
| High | VYTVASDcGVSTAcINDSWQ      | 2  | 1 | 1 | g2158.t1  |
| High | IcATGGVGSLDDDPEDAQFSPEEIK | 1  | 1 | 1 | g3307.t1  |
| High | VDATAAGPIGVPLPQNSQYTFIQQf | 1  | 1 | 1 | g4355.t1  |
| High | NTALTGScTILSGSNPVAYGYLGcY | 1  | 1 | 1 | g4355.t1  |
| High | SVYSLNSGIAASSAVAVGR       | 8  | 1 | 1 | g2158.t1  |
| High | VPTSAGTLTLPQLGGSLTLNGR    | 1  | 1 | 1 | g4603.t1  |
| High | YmGPLPYGNLGVGEYQYGGR      | 2  | 1 | 1 | g10153.t1 |
| High | RDVSNWDTVSQNWWVSNYTK      | 2  | 1 | 1 | g377.t1   |
| High | NWEGFSPDPYLTGISFAETIK     | 2  | 1 | 1 | g9150.t1  |
| High | NLGYIPTDDFDYPYQGQPLTR     | 2  | 1 | 1 | g3185.t1  |
| High | SSNLVNSATWAGYDLQVTK       | 2  | 1 | 1 | g6228.t1  |
| High | TVEYSLNDFALSQVAAGIQPADK   | 2  | 1 | 1 | g9337.t1  |
| High | GLTDGIDWDTAYAAVQK         | 3  | 1 | 1 | g6145.t1  |
| High | TRFNPIYPAScPFVTSVGGTYR    | 1  | 1 | 1 | g8103.t1  |
| High | SGAVTFETNPEVSSSITSSWSK    | 2  | 1 | 1 | g3385.t1  |
| High | AGATDISQITPPNSAPV GALWYR  | 3  | 1 | 1 | g4474.t1  |
| High | VYTLNTVGVTNmIEVDGTSEAK    | 8  | 1 | 1 | g9324.t1  |
| High | ELAYAVEAGmSPLEAIEASTAR    | 1  | 1 | 1 | g3307.t1  |
| High | AGmVADSGALASAGYQK         | 1  | 1 | 1 | g7301.t1  |
| High | TQmSQGAVAPDLLYFAPK        | 2  | 1 | 1 | g3707.t1  |
| High | ATAVSQAINDNLWDASV GAYVDEr | 2  | 1 | 1 | g5548.t1  |
| High | DFGAKGDGSTDDTDAINSAISSDI  | 1  | 1 | 1 | g3077.t1  |
| High | SSGAKGDGSTDDTAAIQSALNSAA  | 2  | 1 | 1 | g9324.t1  |
| High | FVAVFGEDAGSNPDGVNGcSDR    | 2  | 1 | 1 | g377.t1   |
| High | DVSNWDTVSQNWWVSNYTK       | 3  | 1 | 1 | g377.t1   |
| High | DMFYSDLANWINVTPTNR        | 4  | 1 | 1 | g3995.t1  |
| High | GGPIILYQPENESGWTTGYSDDG   | 2  | 1 | 1 | g4603.t1  |
| High | YAATELEDLEIVDNK           | 2  | 1 | 1 | g3202.t1  |
| High | VYTLNTVGVTNmIEVDGTSEAK    | 2  | 1 | 1 | g9324.t1  |
| High | IVNYGGDSSTTVTLVPGK        | 2  | 1 | 1 | g8248.t1  |
| High | FISDASDQGYGFVSDFR         | 1  | 1 | 1 | g1325.t1  |
| High | AASHmcLTATDSVYTNSLPVQAcEF | 1  | 1 | 1 | g4013.t1  |
| High | SADNLWYVTLNLPSGTAFeyK     | 2  | 1 | 1 | g2158.t1  |
| High | GGVLEITTGASESAWGTK        | 2  | 1 | 1 | g3185.t1  |
| High | VSVEDVQGGFFQDLNALQGQR     | 3  | 1 | 1 | g10298.t1 |
| High | ELANGPEQYWGP NLETLIAIK    | 2  | 1 | 1 | g4895.t1  |
| High | GKGVDVQLGPVAGPLGR         | 3  | 1 | 1 | g377.t1   |
| High | DVVIIGGGASGAYAGVR         | 1  | 1 | 1 | g10298.t1 |
| High | STLLIESNTPESDDPTK         | 1  | 1 | 1 | g7045.t1  |
| High | SIYTINSGIAEGEGVAIGR       | 1  | 1 | 1 | g8259.t1  |
| High | TLVISEDGSLVAVGNQK         | 1  | 1 | 1 | g7811.t1  |
| High | NSPTGIAASAGIGKNPDDIVNDIK  | 2  | 1 | 1 | g10182.t1 |
| High | ETSESSFLNYALNAGLPLTVYK    | 4  | 1 | 1 | g3369.t1  |
| High | QVLGATSFAGTAENPLLFLK      | 2  | 1 | 1 | g456.t1   |
| High | GDQSFAPDDSVAFLDGSSDASGTL  | 2  | 1 | 1 | g7811.t1  |
| High | TVEAQSGSAYVIYSDIR         | 2  | 1 | 1 | g2234.t1  |
| High | ELEAAFIGTcIAQGcR          | 2  | 1 | 1 | g7148.t1  |
| High | DSSVNPLTYTDGPPSAAR        | 3  | 1 | 1 | g571.t1   |
| High | TLIDNFIAGTSDLESTIK        | 5  | 1 | 1 | g2158.t1  |
| High | GDWESWAASLASESTR          | 7  | 1 | 1 | g3995.t1  |
| High | LSLGAGEEAQWTATLTR         | 10 | 1 | 1 | g377.t1   |
| High | IAQYASLPAQLMVDNK          | 2  | 1 | 1 | g6554.t1  |

|      |                            |    |   |   |           |
|------|----------------------------|----|---|---|-----------|
| High | QSAPYAPLLVTGTETSNDGALSAPC  | 1  | 1 | 1 | g8806.t1  |
| High | AVGAEVDSFDScNFDINR         | 2  | 1 | 1 | g3202.t1  |
| High | YDncYSDAATNYPNVNYAPSTSPE/  | 1  | 1 | 1 | g2125.t1  |
| High | AIGAQTSYQEcPNGPYNK         | 2  | 1 | 1 | g4362.t1  |
| High | ALFASSITTASDVVTLQ          | 1  | 1 | 1 | g8806.t1  |
| High | VQSDFESEFKTAAGLVGAEDFTSAF  | 1  | 1 | 1 | g10182.t1 |
| High | VGVSFISVDQAcSNGEKEIPDFDFD  | 1  | 1 | 1 | g3185.t1  |
| High | SATNERELEAAFIGTcIAQGcR     | 1  | 1 | 1 | g7148.t1  |
| High | TVEYAYNDYcVGVVGK           | 1  | 1 | 1 | g4882.t1  |
| High | GDGSTDDTDAINSAISSSDR       | 3  | 1 | 1 | g3077.t1  |
| High | HSSNQLLLNDGDK              | 2  | 1 | 1 | g5789.t1  |
| High | TLHITATGLDYNESYVQSVR       | 1  | 1 | 1 | g9337.t1  |
| High | IGLGNSGcYSFESVDTPGSYIR     | 2  | 1 | 1 | g5789.t1  |
| High | DLTWSYAALLTANNR            | 2  | 1 | 1 | g2140.t1  |
| High | SAGAKGDGTTDDTAIIQK         | 2  | 1 | 1 | g3077.t1  |
| High | ADEVTTFPLLQAIR             | 5  | 1 | 1 | g3385.t1  |
| High | IGYIGPGGTAVTTISAASAGTK     | 2  | 1 | 1 | g2125.t1  |
| High | VFVSSFAGDGDVAALR           | 5  | 1 | 1 | g6554.t1  |
| High | HAQDGNIAVIAGIANSSQAASALK   | 1  | 1 | 1 | g5548.t1  |
| High | VAGVEVPQLYVSLGGPSDAPK      | 3  | 1 | 1 | g377.t1   |
| High | LTYSIDmALDPTQSVSASFTAAGK   | 1  | 1 | 1 | g5860.t1  |
| High | GYTQGGSNADNVIADAYVK        | 2  | 1 | 1 | g6145.t1  |
| High | TLEYAYNDFAISQIAR           | 1  | 1 | 1 | g6145.t1  |
| High | GSDLLVIDTGDRVEGNGLYDASNP   | 1  | 1 | 1 | g8480.t1  |
| High | DANTVLASINTFDQPATcDDVTFQf  | 9  | 1 | 1 | g2140.t1  |
| High | VSLNLGNSAGSTSSLPTNQ        | 2  | 1 | 1 | g4461.t1  |
| High | SPLLELSGIGNPDILK           | 2  | 1 | 1 | g2143.t1  |
| High | DLGNDVLYNSTVLQSLR          | 2  | 1 | 1 | g10298.t1 |
| High | NADLIAFNQDPVIGKPALPYK      | 4  | 1 | 1 | g2384.t1  |
| High | TVDTTKPFTVVTQFVTS DGTNTGT  | 4  | 1 | 1 | g2234.t1  |
| High | TVQTLSDGVNDDESYSAGAFTR     | 2  | 1 | 1 | g3185.t1  |
| High | GAPTLLGGTSAAAPVFAAILTR     | 1  | 1 | 1 | g3993.t1  |
| High | YTFTPAAGVITLAEADIR         | 4  | 1 | 1 | g1839.t1  |
| High | IIEGWAVLSGAGGAFTDPYNPR     | 2  | 1 | 1 | g8428.t1  |
| High | YFTTDPASDcATNPIGcATVQLEDA  | 3  | 1 | 1 | g3385.t1  |
| High | IGQLIVIVSPSEVTmSGR         | 3  | 1 | 1 | g216.t1   |
| High | GYPDVAAIGDNVLIYNR          | 2  | 1 | 1 | g3993.t1  |
| High | FWGNAFmDDDSLGSSTDR         | 2  | 1 | 1 | g5548.t1  |
| High | LIIAAVmNSYGSNPPTNTWK       | 4  | 1 | 1 | g8260.t1  |
| High | IAQYASLPAQLmVDNK           | 2  | 1 | 1 | g6554.t1  |
| High | TQTLQVAAPTEDLGLDGVPVSQLPGI | 3  | 1 | 1 | g4013.t1  |
| High | DIGLFQDDDGSAYLLEDTR        | 1  | 1 | 1 | g5620.t1  |
| High | QINDVATDTQGFVGYSTSK        | 1  | 1 | 1 | g6784.t1  |
| High | VTGNIEQLPVAISLLGAPNR       | 2  | 1 | 1 | g7294.t1  |
| High | AIQDSWPVFAHAFFDLGR         | 11 | 1 | 1 | g3995.t1  |
| High | TNPDQTQTIDAcNLQFLYQGR      | 1  | 1 | 1 | g7927.t1  |
| High | RYTEDQYDVWSGPLSGQR         | 1  | 1 | 1 | g2125.t1  |
| High | ADGLNKVFVNTEAHPFK          | 2  | 1 | 1 | g4633.t1  |
| High | DTGAPLSASALTWSYAALLTAAAR   | 9  | 1 | 1 | g2158.t1  |
| High | VLNATAYLFPNYIK             | 1  | 1 | 1 | g377.t1   |
| High | KAVLNQGVFEHPTYGK           | 2  | 1 | 1 | g6658.t1  |
| High | IYDENEQVYQIPK              | 3  | 1 | 1 | g8295.t1  |
| High | EALWTSDYSTTAQLYHTK         | 3  | 1 | 1 | g3279.t1  |
| High | ADPEVSYNDVYLQNVFATVEmFAK   | 2  | 1 | 1 | g608.t1   |
| High | GVTISDAIEAGALTAFGSDSDR     | 2  | 1 | 1 | g9490.t1  |
| High | TAAVSAAcEAGFTSLHITSSAK     | 3  | 1 | 1 | g9324.t1  |
| High | TGLGNSAcYSFESVDTPGSFIR     | 3  | 1 | 1 | g9312.t1  |
| High | KPcEDSSLcYADLEFVSTYLNQAEVI | 1  | 1 | 1 | g3202.t1  |
| High | TPLVLEFGFPVYAESTR          | 3  | 1 | 1 | g8384.t1  |

|      |                           |    |   |   |           |
|------|---------------------------|----|---|---|-----------|
| High | SNNWADWYVDGVYIK           | 4  | 1 | 1 | g5915.t1  |
| High | DIDNAITALQESWAEVK         | 3  | 1 | 1 | g290.t1   |
| High | SDPIENFSAWcLATQR          | 2  | 1 | 1 | g3149.t1  |
| High | IcATGGVGSLDDPEDAQFSPEEIK  | 3  | 1 | 1 | g3307.t1  |
| High | YITHTGSTVNTQVVTSSDDLTTTR  | 1  | 1 | 1 | g9312.t1  |
| High | TYPLEGTmVFFPQYAPYTDPIR    | 3  | 1 | 1 | g4355.t1  |
| High | LRTSLPSNPNIYGLGEDSDSFKR   | 4  | 1 | 1 | g8295.t1  |
| High | DEYGPIYAAAGPEYGVGK        | 1  | 1 | 1 | g6857.t1  |
| High | TWmPTDPYIYGLGEDVDSFR      | 2  | 1 | 1 | g9290.t1  |
| High | FNPIYPAScPFVTSVGGTYR      | 2  | 1 | 1 | g8103.t1  |
| High | WTSSGSLANPASGYLSLK        | 1  | 1 | 1 | g3707.t1  |
| High | FLIGDADSALDEIHR           | 2  | 1 | 1 | g5548.t1  |
| High | EAQPTFDSNGQFVTNVYTQWR     | 2  | 1 | 1 | g6658.t1  |
| High | DVEISQTGPVSLAPIR          | 2  | 1 | 1 | g1180.t1  |
| High | GKGAHVALGPVAGPLGR         | 1  | 1 | 1 | g9150.t1  |
| High | LVMAPLFENQEAGQYPNR        | 6  | 1 | 1 | g3995.t1  |
| High | cQSmIQScYDSESAWtCVPASIYcN | 1  | 1 | 1 | g3202.t1  |
| High | EAGLGDEEAEVLFSSK          | 1  | 1 | 1 | g5328.t1  |
| High | YGTGANTYDTDIQEFPEEFR      | 3  | 1 | 1 | g2392.t1  |
| High | YIEPQYADTFEFYNGER         | 2  | 1 | 1 | g7487.t1  |
| High | ELPAVDITNPTTDVSEYVVGK     | 2  | 1 | 1 | g1325.t1  |
| High | AEGIFDLQPFFNAAK           | 2  | 1 | 1 | g4603.t1  |
| High | NHADISANYQEFYR            | 4  | 1 | 1 | g8295.t1  |
| High | DmFYSDLANWINVPTPTR        | 10 | 1 | 1 | g3995.t1  |
| High | VGLSFISEDQAcSNAEK         | 1  | 1 | 1 | g6145.t1  |
| High | TGLDANSILGVIETFDPEASScDDA | 6  | 1 | 1 | g2158.t1  |
| High | DYLTAAGSILTVEAR           | 1  | 1 | 1 | g7797.t1  |
| High | SAFRPSDDATIFGYFVPANAmSV   | 4  | 1 | 1 | g6658.t1  |
| High | EAIGDDKVLSIATPGLQR        | 2  | 1 | 1 | g3385.t1  |
| High | TYSNVVILSDLTATTYYYYK      | 2  | 1 | 1 | g10048.t1 |
| High | AGGAQGGNPALWDTVFTVDLK     | 1  | 1 | 1 | g3139.t1  |
| High | FESISGNEADVGDYVIQYLQAR    | 2  | 1 | 1 | g3728.t1  |
| High | SNNNNVNDEFQSIDGFAPNNQQI   | 1  | 1 | 1 | g5593.t1  |
| High | FQFPTGDSSASPLILLDLTDLSDSR | 1  | 1 | 1 | g6145.t1  |
| High | TGDVKPEEDETVPVFLALR       | 2  | 1 | 1 | g7301.t1  |
| High | ADEINQIFDAISYSK           | 1  | 1 | 1 | g7301.t1  |
| High | QVIVVNKDKPNEFGEYPGYR      | 1  | 1 | 1 | g6228.t1  |
| High | QPIDTITSWIADNGFNcVR       | 1  | 1 | 1 | g5860.t1  |
| High | NDmGYHNIEANSILVYTLK       | 1  | 1 | 1 | g9487.t1  |
| High | TPSSWESETITWYmDGK         | 3  | 1 | 1 | g1839.t1  |
| High | SGGScTTNAGSITLDANWR       | 1  | 1 | 1 | g2234.t1  |
| High | SSADQTKPVPcNLQLLYQGR      | 1  | 1 | 1 | g3707.t1  |
| High | SILDPPSGQQDSSSQSDLVFEYTK  | 8  | 1 | 1 | g8295.t1  |
| High | SITWGTSGPISVPQNLNVQLPR    | 2  | 1 | 1 | g4076.t1  |
| High | QDLDTVSVDITNAEYAFEHGVNIG  | 6  | 1 | 1 | g5915.t1  |
| High | AYIAPASPWFS THFGEVSYSK    | 5  | 1 | 1 | g6554.t1  |
| High | HSDYTSLDTTSYTLK           | 2  | 1 | 1 | g4603.t1  |
| High | EIFSPADAPVVNLATYQFGTL     | 5  | 1 | 1 | g881.t1   |
| High | QYAEVVGAPAEQAYWTYGFHQcK   | 1  | 1 | 1 | g9290.t1  |
| High | QTGYDIFcSDSILIQ GK        | 1  | 1 | 1 | g7487.t1  |
| High | YAGTcDPDGcDFNPYR          | 1  | 1 | 1 | g2234.t1  |
| High | IFSEDATFcPQSGLNQGNSFR     | 2  | 1 | 1 | g9312.t1  |
| High | ANSGATWTNDISSGDLIR        | 1  | 1 | 1 | g7927.t1  |
| High | IGPEVFAWDEAGVPADQEAFYK    | 4  | 1 | 1 | g4633.t1  |
| High | IGNDISSSWSSIYR            | 1  | 1 | 1 | g2125.t1  |
| High | TFTTAETTTNANS AK          | 1  | 1 | 1 | g5215.t1  |
| High | DAEVTPYNTFDPTDFTASTK      | 2  | 1 | 1 | g9337.t1  |
| High | SDcADTSLLGNFIENHDNPR      | 3  | 1 | 1 | g3279.t1  |
| High | ADGTYVmYFSAAAASDSSK       | 2  | 1 | 1 | g8806.t1  |



|      |                            |   |   |   |           |
|------|----------------------------|---|---|---|-----------|
| High | FSYEQIHPIEPGSTTLVAR        | 1 | 1 | 1 | g4704.t1  |
| High | RSTGTYVVCdGVSDcVK          | 1 | 1 | 1 | g3307.t1  |
| High | EVSYASVFPAGVSVAATWDR       | 1 | 1 | 1 | g9150.t1  |
| High | TRDTVNVLIADAGQGAIYK        | 2 | 1 | 1 | g7486.t1  |
| High | QLLVAIEPTTQNmAPFDLDDNEKN   | 2 | 1 | 1 | g10298.t1 |
| High | DSmISALLLEPILSK            | 2 | 1 | 1 | g395.t1   |
| High | DISNWDVVLQDWVVR            | 3 | 1 | 1 | g6857.t1  |
| High | TDADWNLIYQWER              | 1 | 1 | 1 | g216.t1   |
| High | NAAGTVGLAQVPAGSVTDK        | 1 | 1 | 1 | g9526.t1  |
| High | GIAYQLSDNDPLVNEAQcK        | 1 | 1 | 1 | g886.t1   |
| High | GTLLLSGGNVQPSLSADSYYTTSPc  | 1 | 1 | 1 | g3001.t1  |
| High | YTGDAFVAEQWNR              | 2 | 1 | 1 | g9487.t1  |
| High | VGVSFISVDQAcSNGEK          | 1 | 1 | 1 | g3185.t1  |
| High | ASGKPVVEEmDVWTK            | 1 | 1 | 1 | g7301.t1  |
| High | LHVKIYDENEQVYQIPK          | 1 | 1 | 1 | g8295.t1  |
| High | QPDWQETFFGSNYDALLK         | 3 | 1 | 1 | g10153.t1 |
| High | IDGNSLDGDGTTHTSTPImLQQmE/  | 3 | 1 | 1 | g8806.t1  |
| High | GLSANQFIVFLER              | 1 | 1 | 1 | g7147.t1  |
| High | ITNEFVPQLEAVTPGSGcYQNEANF  | 3 | 1 | 1 | g10153.t1 |
| High | FGKPVGAVGGASAALSAVDISTDR   | 1 | 1 | 1 | g9148.t1  |
| High | AVEFVSQTLAEK               | 3 | 1 | 1 | g377.t1   |
| High | GRGPYFLENDAGTK             | 3 | 1 | 1 | g216.t1   |
| High | FSYTESPFSFTVQR             | 1 | 1 | 1 | g9290.t1  |
| High | VGGSAGTGLQSDTcSK           | 1 | 1 | 1 | g3077.t1  |
| High | AVPQVYLSFPSSQTNISDDGLPTPV  | 2 | 1 | 1 | g9150.t1  |
| High | WSLTEGYAPNPPLADR           | 3 | 1 | 1 | g5915.t1  |
| High | NIYIQSATLNGQPYTK           | 1 | 1 | 1 | g6145.t1  |
| High | DFAFNALNQNFIVPGScPNADQIDA/ | 2 | 1 | 1 | g5593.t1  |
| High | TYWDEVGcGLLFDK             | 1 | 1 | 1 | g10182.t1 |
| High | VIDSGYDYWYLDcGR            | 1 | 1 | 1 | g2794.t1  |
| High | ASLVWEEAQAVSGK             | 1 | 1 | 1 | g9148.t1  |
| High | GSTNmPAEVFLPGGVYTLGSTLTlF  | 2 | 1 | 1 | g8428.t1  |
| High | LAAFAATEEPiEcVDYQAPWNPR    | 1 | 1 | 1 | g7294.t1  |
| High | LASGTTNQVQEYLGIPIYAQPPVNEI | 1 | 1 | 1 | g10240.t1 |
| High | DSIQWLIDGSVVR              | 3 | 1 | 1 | g2989.t1  |
| High | QKYDPDYFFYALK              | 1 | 1 | 1 | g10153.t1 |
| High | TALNSNPTGIAAAIR            | 2 | 1 | 1 | g10153.t1 |
| High | DTTTSINAILK                | 1 | 1 | 1 | g2125.t1  |
| High | LSYYcENGpQVDTLILSFVTR      | 2 | 1 | 1 | g9455.t1  |
| High | FLTTEQALADVAYFAR           | 1 | 1 | 1 | g5245.t1  |
| High | AFIHEPSAEQIacQAPK          | 4 | 1 | 1 | g216.t1   |
| High | NYALQWDNGYTTYK             | 1 | 1 | 1 | g2159.t1  |
| High | AFSAAITPcSFSPQGPTTR        | 1 | 1 | 1 | g4355.t1  |
| High | DTDYNTAFPAGVNVAATWDLDA\    | 1 | 1 | 1 | g377.t1   |
| High | DTGALSPLANLQGIWNEDFSPSWG   | 2 | 1 | 1 | g4461.t1  |
| High | SPLIIGTDLSTLPETHLSILK      | 4 | 1 | 1 | g2384.t1  |
| High | ALVGNDIYNVLPAPWR           | 2 | 1 | 1 | g3187.t1  |
| High | DAAILQYLGVSIR              | 1 | 1 | 1 | g5495.t1  |
| High | QLLVAIEPTTQNmAPFDLDDNEK    | 1 | 1 | 1 | g10298.t1 |
| High | IGFNGLcLQDGPLAIR           | 2 | 1 | 1 | g9150.t1  |
| High | EYLVANGVQAAPLVPK           | 1 | 1 | 1 | g4076.t1  |
| High | TLTAAEAGDYFPQTPMR          | 3 | 1 | 1 | g2989.t1  |
| High | ELGLNLVPESVYEmQSNFYPTVNGI  | 8 | 1 | 1 | g3995.t1  |
| High | TVAALVNWADEAR              | 1 | 1 | 1 | g2125.t1  |
| High | SSQTFVLSGLSASTVTAK         | 1 | 1 | 1 | g9236.t1  |
| High | NGVIQGLANLGGEYAR           | 2 | 1 | 1 | g216.t1   |
| High | IGSITITSTSLAFFK            | 1 | 1 | 1 | g2140.t1  |
| High | VLDSATSDQIVYFDHGAYLITSTIK  | 2 | 1 | 1 | g3077.t1  |
| High | NNPGNDVQLVTLLYNFR          | 2 | 1 | 1 | g4461.t1  |

|      |                           |   |   |   |           |
|------|---------------------------|---|---|---|-----------|
| High | IGGFTGSDLQVANcPK          | 3 | 1 | 1 | g9324.t1  |
| High | mSTYPQmTNDAYSPSQTFSHDDI   | 3 | 1 | 1 | g4076.t1  |
| High | VHTYLYGPGSIFVAHGADEAITVR  | 1 | 1 | 1 | g3728.t1  |
| High | AAFITNFPDDQQSTLPR         | 3 | 1 | 1 | g4965.t1  |
| High | THDFEILVAPDVDGK           | 4 | 1 | 1 | g8295.t1  |
| High | SYTVPTGcAGLTATVDDTW       | 2 | 1 | 1 | g3279.t1  |
| High | EDDDFENPGDPTPENPSGIALLR   | 1 | 1 | 1 | g6836.t1  |
| High | QEGTFAAVEFLNPK            | 2 | 1 | 1 | g216.t1   |
| High | LIVEEGLKNPSIFPPTSYQK      | 3 | 1 | 1 | g3307.t1  |
| High | YTPADGTLAEQFQR            | 5 | 1 | 1 | g2158.t1  |
| High | NDGSAGEEIAVPANK           | 3 | 1 | 1 | g3685.t1  |
| High | GLTDGIDWDTAYAAVQKDAEEEPY  | 1 | 1 | 1 | g6145.t1  |
| High | TVDTTKPFTVWTQFVTS         | 3 | 1 | 1 | g2234.t1  |
| High | TAAGLVGAEDFTSAR           | 2 | 1 | 1 | g10182.t1 |
| High | ILNFREYLVANGVQAAPLVPK     | 1 | 1 | 1 | g4076.t1  |
| High | LFSEDATFcPmAGLNGQGNSIR    | 1 | 1 | 1 | g5789.t1  |
| High | QYAGVVGGLPAQQSYWTFYGFHQCk | 2 | 1 | 1 | g8295.t1  |
| High | EVFLTGGPLPLINGPDIYEK      | 3 | 1 | 1 | g7845.t1  |
| High | TGVVTGGSVSDDFVK           | 1 | 1 | 1 | g9148.t1  |
| High | TLTAAEAGDYFPQTPmR         | 2 | 1 | 1 | g2989.t1  |
| High | ITGNLGGEDYVDLTR           | 1 | 1 | 1 | g4603.t1  |
| High | TTDLSGTISNVQLVYVDR        | 2 | 1 | 1 | g4355.t1  |
| High | GNYDGASLcESTYSSTRPPVPYK   | 1 | 1 | 1 | g9673.t1  |
| High | DLLNPPYPLGTVDGIYGGTIFTDR  | 3 | 1 | 1 | g9290.t1  |
| High | GVDVQLGPVAGPLGR           | 5 | 1 | 1 | g377.t1   |
| High | MTVTQDQSL                 | 1 | 1 | 1 | g5548.t1  |
| High | ASTNmITSSDGTSLALQEDNTSSFA | 1 | 1 | 1 | g3077.t1  |
| High | LVGmFDDEEVGSLLR           | 1 | 1 | 1 | g7627.t1  |
| High | NYANHIGTTIAANQITK         | 1 | 1 | 1 | g4603.t1  |
| High | QTLEDALYFEDGYK            | 1 | 1 | 1 | g9673.t1  |
| High | SQmPFLTIDPETVTK           | 3 | 1 | 1 | g6145.t1  |
| High | LQmAQFmNcGTDDER           | 2 | 1 | 1 | g608.t1   |
| High | LPVSSLYIDIFQK             | 2 | 1 | 1 | g4603.t1  |
| High | TYNDVTQYWVDHAFPIFK        | 3 | 1 | 1 | g4076.t1  |
| High | QLTVGGWSGVSTEGIR          | 1 | 1 | 1 | g4355.t1  |
| High | SSVSTQTSTVTVASNR          | 1 | 1 | 1 | g2125.t1  |
| High | TQTEILEGNYGGGTAmR         | 1 | 1 | 1 | g5374.t1  |
| High | DSVNQVmNYQTLAK            | 2 | 1 | 1 | g6658.t1  |
| High | VANAVDFSGHAEFSK           | 3 | 1 | 1 | g4362.t1  |
| High | DALPDYAITYAPLSYLSGEK      | 4 | 1 | 1 | g10314.t1 |
| High | ALSQHVVHVVGGNGFASTmDFAQ   | 1 | 1 | 1 | g2392.t1  |
| High | AANDELASAVANPTR           | 1 | 1 | 1 | g3952.t1  |
| High | YGIVTYYNALYVLALQDAK       | 2 | 1 | 1 | g5548.t1  |
| High | SVVEYPLPAAAEHEIVAVSDNLLL  | 2 | 1 | 1 | g3685.t1  |
| High | SHPSILLWYTGDEPDGK         | 1 | 1 | 1 | g5993.t1  |
| High | QDAPHPEVFLDPTNSYILSPDLGA  | 3 | 1 | 1 | g7811.t1  |
| High | FSGNPIISAALPHDVTGGLESR    | 1 | 1 | 1 | g8260.t1  |
| High | GTYYESGIDVDVR             | 4 | 1 | 1 | g3995.t1  |
| High | ELETTLLAGFTTIR            | 2 | 1 | 1 | g3307.t1  |
| High | GYDIPLYFTFGNSSGSSYR       | 1 | 1 | 1 | g4603.t1  |
| High | SSESALTQGSAGAVLR          | 1 | 1 | 1 | g4733.t1  |
| High | TTFDLWEETQGSFFTTAAQHR     | 4 | 1 | 1 | g2158.t1  |
| High | SPYAYLANPEDERAQYDYTDK     | 1 | 1 | 1 | g216.t1   |
| High | DLGGYALDDLK               | 1 | 1 | 1 | g2465.t1  |
| High | SKPQYETYGTGSVSVR          | 3 | 1 | 1 | g9324.t1  |
| High | SYTVPSGcGVSTATESDTWR      | 3 | 1 | 1 | g2140.t1  |
| High | SGADDYVDIVLSAR            | 1 | 1 | 1 | g456.t1   |
| High | WYTALDTVLQTLDK            | 3 | 1 | 1 | g6658.t1  |
| High | NYPNTAGFFSGNEVINEDSVLVP   | 2 | 1 | 1 | g5495.t1  |

|      |                           |    |   |   |           |
|------|---------------------------|----|---|---|-----------|
| High | TSLPSNPNIYGLGEDSDSFKR     | 1  | 1 | 1 | g8295.t1  |
| High | SHmAFPAIGDYNTGIcPSSHPR    | 2  | 1 | 1 | g4013.t1  |
| High | STGTYYVcDGVSDcVK          | 2  | 1 | 1 | g3307.t1  |
| High | EVGGIAGEIWPAIK            | 1  | 1 | 1 | g3307.t1  |
| High | WSDYDAPQPIAIINVAEEK       | 1  | 1 | 1 | g2283.t1  |
| High | SKPQYETVAASSFVSVK         | 2  | 1 | 1 | g3077.t1  |
| High | LLPDTEPQDYVTNENYYLYK      | 3  | 1 | 1 | g8384.t1  |
| High | FLEHPDQFADAFAR            | 1  | 1 | 1 | g4318.t1  |
| High | NHHYPPGGLSTDTTLSAK        | 1  | 1 | 1 | g3149.t1  |
| High | GQAIIAWDVSSSR             | 1  | 1 | 1 | g4603.t1  |
| High | YSYmIHAEDADWQTK           | 2  | 1 | 1 | g4633.t1  |
| High | AVLNQGVFEHPTYGK           | 4  | 1 | 1 | g6658.t1  |
| High | DAGNSVSNDPSFPFSR          | 2  | 1 | 1 | g10078.t1 |
| High | EGYDADVIAVASNPLDDINILGEPE | 1  | 1 | 1 | g3307.t1  |
| High | AGAQYGVGYcDSQcPR          | 2  | 1 | 1 | g2234.t1  |
| High | FKQNVPIPSYLFAVASGDLTEAPVG | 1  | 1 | 1 | g7147.t1  |
| High | IcEAYGAPTSNGAAGK          | 2  | 1 | 1 | g7482.t1  |
| High | GFNYGSTFNDNSVK            | 1  | 1 | 1 | g10182.t1 |
| High | ALAPNSGAYmNEADFR          | 1  | 1 | 1 | g3187.t1  |
| High | SGVQFVPSNFLPSDPSR         | 1  | 1 | 1 | g6228.t1  |
| High | FEDSTcNGQTELCR            | 1  | 1 | 1 | g216.t1   |
| High | LDHLYGGLSVIK              | 1  | 1 | 1 | g5993.t1  |
| High | VANSPQNLAWYSISTK          | 1  | 1 | 1 | g8428.t1  |
| High | GVDIQLGPVSGPLGR           | 1  | 1 | 1 | g6857.t1  |
| High | VTFDSQISTTQVR             | 1  | 1 | 1 | g5548.t1  |
| High | YNAPGPGASLPNIWTLNAPPGSIS  | 5  | 1 | 1 | g5915.t1  |
| High | DFDGAmsWENVPASDGR         | 1  | 1 | 1 | g8260.t1  |
| High | TPSSWESETITWYMDGK         | 1  | 1 | 1 | g1839.t1  |
| High | IPNTTPLTDFEVPEAIER        | 3  | 1 | 1 | g7031.t1  |
| High | SLGFANcLIDDYPEIPSR        | 2  | 1 | 1 | g6836.t1  |
| High | SQMPFLTIDPETVTK           | 3  | 1 | 1 | g6145.t1  |
| High | DRDPYVGDIASVGK            | 2  | 1 | 1 | g5548.t1  |
| High | NVmDDANIPSLALPYLGFLDVDDI  | 2  | 1 | 1 | g6658.t1  |
| High | AAALAEVWSGNKDPK           | 4  | 1 | 1 | g4076.t1  |
| High | IVLGTGmKDILPITPGVVEGWGK   | 1  | 1 | 1 | g4965.t1  |
| High | DGAWLHQQIFDAVVK           | 2  | 1 | 1 | g9673.t1  |
| High | GIDFTEDPLLQGR             | 2  | 1 | 1 | g9148.t1  |
| High | LPEGVTA PDILPGLLK         | 2  | 1 | 1 | g290.t1   |
| High | SDNQGWGDYGFLSR            | 1  | 1 | 1 | g5548.t1  |
| High | FLPLGGGYSPDmFmR           | 1  | 1 | 1 | g1180.t1  |
| High | LLQAFYAQFPEYESR           | 2  | 1 | 1 | g4362.t1  |
| High | SNIFQTISWLDSSK            | 1  | 1 | 1 | g3954.t1  |
| High | QIPVGYSAADIDTNR           | 2  | 1 | 1 | g608.t1   |
| High | EPSNDPYPYSTYSTYLSNSR      | 3  | 1 | 1 | g4362.t1  |
| High | VSIADLIVLAGSAAVEK         | 2  | 1 | 1 | g4318.t1  |
| High | HYGYDVQDNIK               | 1  | 1 | 1 | g3006.t1  |
| High | LPGGNNLEGIASPYR           | 1  | 1 | 1 | g8248.t1  |
| High | YDTQSSGLASGR              | 1  | 1 | 1 | g8480.t1  |
| High | VIEVTSNDGSETK             | 2  | 1 | 1 | g3006.t1  |
| High | EISSDGNVNTVDVIFPAHPAYLYTN | 10 | 1 | 1 | g3995.t1  |
| High | cPETLGSHFAPLSGQLK         | 1  | 1 | 1 | g3307.t1  |
| High | TYPLEGTMVFFPQYAPYTDPIR    | 2  | 1 | 1 | g4355.t1  |
| High | FDGILGLGFDTISVVK          | 1  | 1 | 1 | g916.t1   |
| High | AGATAVDSYITSDELIYWYRPTPK  | 4  | 1 | 1 | g6554.t1  |
| High | GINVQmGPVVGPIGR           | 1  | 1 | 1 | g3139.t1  |
| High | VGAGIVGYQIMEAAHEK         | 1  | 1 | 1 | g10153.t1 |
| High | SLNYIPVQDLDYVGFGTmTR      | 2  | 1 | 1 | g6145.t1  |
| High | VTLFEDPALSSDSFR           | 1  | 1 | 1 | g7147.t1  |
| High | AEASVSNNVPTWR             | 1  | 1 | 1 | g10240.t1 |

|      |                            |    |   |   |           |
|------|----------------------------|----|---|---|-----------|
| High | VAGTAGGETNIDSTRGPYNEGGLY   | 1  | 1 | 1 | g7406.t1  |
| High | ALVEGANFATSLGK             | 2  | 1 | 1 | g8259.t1  |
| High | HSNYELmLNANDGSK            | 3  | 1 | 1 | g9312.t1  |
| High | AIHQLITLVDPLSQSR           | 1  | 1 | 1 | g3185.t1  |
| High | YmWADFmLDDPR               | 1  | 1 | 1 | g9487.t1  |
| High | LAYSTD LGTTWLK             | 1  | 1 | 1 | g8260.t1  |
| High | ATSDSGIFSEmQR              | 1  | 1 | 1 | g6784.t1  |
| High | VLIcGGSTPYGGDAIDNcVSIEPDVf | 1  | 1 | 1 | g4355.t1  |
| High | LAVTAGIGSDHVDLDAANK        | 1  | 1 | 1 | g8017.t1  |
| High | mSTYPQmTNDAYSPSQTFSHDDIk   | 2  | 1 | 1 | g4076.t1  |
| High | GGNKPSFGAGLAGLEPK          | 1  | 1 | 1 | g2283.t1  |
| High | NTGKVAGVEVPQLYVSLGGPSDAP   | 1  | 1 | 1 | g377.t1   |
| High | DGNVDYDETWGLLNHDWSDWR      | 1  | 1 | 1 | g5860.t1  |
| High | GYAPYVQGNPQYPVYR           | 2  | 1 | 1 | g8428.t1  |
| High | DKLIWPGDFGISVPAVFLSTNEVDt  | 1  | 1 | 1 | g9487.t1  |
| High | SPSSDGD SYNDLPYLPGLLTLSK   | 2  | 1 | 1 | g3707.t1  |
| High | DWSDSHYTGPfAK              | 2  | 1 | 1 | g10153.t1 |
| High | DSQAHGVFLSNSNGmDIK         | 1  | 1 | 1 | g8295.t1  |
| High | NNATGQITLITAR              | 1  | 1 | 1 | g10298.t1 |
| High | GIQQSDDDGvvKFETLFGHYTGR    | 2  | 1 | 1 | g2003.t1  |
| High | VALGAFVLPNAK               | 1  | 1 | 1 | g7031.t1  |
| High | LLDEATFQTIR                | 1  | 1 | 1 | g4355.t1  |
| High | VNTYWYILQDAGK              | 1  | 1 | 1 | g10182.t1 |
| High | GDGVTDDAASLNTILR           | 1  | 1 | 1 | g8428.t1  |
| High | HYIGYEQETQR                | 1  | 1 | 1 | g9150.t1  |
| High | AcDYQAGLTAcPSNFmPLAPPAGLf  | 1  | 1 | 1 | g4013.t1  |
| High | AHESLTPGQLSHGTIDIPDGNTNR   | 3  | 1 | 1 | g216.t1   |
| High | GYQILLLDQR                 | 1  | 1 | 1 | g7845.t1  |
| High | RFNGDDSLGDSSR              | 2  | 1 | 1 | g5915.t1  |
| High | DTVLSAVTQSR                | 1  | 1 | 1 | g6580.t1  |
| High | DLSVWDVVVQDWK              | 1  | 1 | 1 | g3139.t1  |
| High | ESSGSIVWESDPNR             | 2  | 1 | 1 | g2140.t1  |
| High | FIEIVTWNDYGESHVVGPLDSPHTI  | 1  | 1 | 1 | g6554.t1  |
| High | TAAIADNTALTGR              | 1  | 1 | 1 | g4461.t1  |
| High | SQYYLSFMSEVLK              | 1  | 1 | 1 | g8384.t1  |
| High | FVELmNSmLEDNFLGYVASATSPiI  | 3  | 1 | 1 | g5915.t1  |
| High | GDGTTDDTAAlQK              | 1  | 1 | 1 | g3077.t1  |
| High | SDDPNDFWTSGSSR             | 1  | 1 | 1 | g4148.t1  |
| High | TDLADIFFSTK                | 1  | 1 | 1 | g727.t1   |
| High | TSSGDPNYGWSTSK             | 1  | 1 | 1 | g377.t1   |
| High | QNSSSGSTTTLQVHLENK         | 1  | 1 | 1 | g1180.t1  |
| High | TAINNLYNAPAR               | 1  | 1 | 1 | g4148.t1  |
| High | SNVPVPAIAIGDYALDLSAFTK     | 3  | 1 | 1 | g6147.t1  |
| High | VFAFEVDGYGGR               | 1  | 1 | 1 | g6658.t1  |
| High | ALmQLNFETLLK               | 1  | 1 | 1 | g10298.t1 |
| High | SLTcVVSSSVSSSK             | 2  | 1 | 1 | g7641.t1  |
| High | ITFLSPITPDDFLR             | 25 | 1 | 1 | g3995.t1  |
| High | FNAGTESVLAR                | 3  | 1 | 1 | g6145.t1  |
| High | DSAGWNQLIVQK               | 1  | 1 | 1 | g7045.t1  |
| High | GPcVGNTAAPSGISYPSLcVQDSPLc | 1  | 1 | 1 | g3821.t1  |
| High | AAYYSLPEWFNPAYEK           | 1  | 1 | 1 | g3954.t1  |
| High | WAmLGAWYPPYR               | 2  | 1 | 1 | g8295.t1  |
| High | SPYAYLANPeder              | 1  | 1 | 1 | g216.t1   |
| High | QcIANNPNLDLAQK             | 2  | 1 | 1 | g9878.t1  |
| High | HYIGNEQEhFR                | 3  | 1 | 1 | g377.t1   |
| High | TTTQFSHENVFTPvFTNEAK       | 1  | 1 | 1 | g3149.t1  |
| High | IESDKVDAWFEEDER            | 1  | 1 | 1 | g6249.t1  |
| High | ADPSWELPLYQR               | 3  | 1 | 1 | g7641.t1  |
| High | NNLRQEGTFAAVEFLNPK         | 1  | 1 | 1 | g216.t1   |

|      |                            |    |   |   |           |
|------|----------------------------|----|---|---|-----------|
| High | ELVSLTLPDIGNTIGSR          | 1  | 1 | 1 | g3954.t1  |
| High | NTPIYQDSNTIAmR             | 5  | 1 | 1 | g3279.t1  |
| High | IKEQIDGmALSK               | 5  | 1 | 1 | g4076.t1  |
| High | SAGSVDLYEGTDR              | 1  | 1 | 1 | g4318.t1  |
| High | VDAAAWIQNK                 | 1  | 1 | 1 | g5993.t1  |
| High | FLLTIaCPAGASNYQK           | 1  | 1 | 1 | g466.t1   |
| High | ILTPYYLNLQDSK              | 1  | 1 | 1 | g9150.t1  |
| High | LWQYQAQSIASYPDDQR          | 1  | 1 | 1 | g4148.t1  |
| High | ILcPETQNTIILIPiENLSPR      | 1  | 1 | 1 | g7294.t1  |
| High | VHYDDGQLVYSAGSDPR          | 1  | 1 | 1 | g2465.t1  |
| High | YSDNISVYPDGLVLFTYN         | 3  | 1 | 1 | g9324.t1  |
| High | VLLYNSDYTTGTR              | 1  | 1 | 1 | g9236.t1  |
| High | LDTLADIPVEDGGIPGSEK        | 2  | 1 | 1 | g3728.t1  |
| High | IFSYLDTQLNR                | 1  | 1 | 1 | g9148.t1  |
| High | DKFQVPINFNSWTR             | 1  | 1 | 1 | g6857.t1  |
| High | SALFLLQSDGK                | 2  | 1 | 1 | g7045.t1  |
| High | GIQEAGVIAcAK               | 1  | 1 | 1 | g6857.t1  |
| High | DAEEEPYDWSNEGR             | 1  | 1 | 1 | g6145.t1  |
| High | LNIFGFPGDPNIR              | 1  | 1 | 1 | g10240.t1 |
| High | TAACVEILQOK                | 1  | 1 | 1 | g7294.t1  |
| High | DLVDQLYDSPR                | 2  | 1 | 1 | g8384.t1  |
| High | VQTSFGALSVPR               | 1  | 1 | 1 | g7406.t1  |
| High | TTIFYSLAGDIR               | 3  | 1 | 1 | g5915.t1  |
| High | SDcSDSNLLGSFSENHDNPR       | 1  | 1 | 1 | g2159.t1  |
| High | TALVDASGVASLLGTTEVAIVDAPE  | 1  | 1 | 1 | g2313.t1  |
| High | DFAFNALNQNFIVPGScPNADQIDA  | 2  | 1 | 1 | g5593.t1  |
| High | NLVLDLTAIPASGGSTGIHWPTAQ   | 2  | 1 | 1 | g9324.t1  |
| High | VVGESYPTImGSGSK            | 2  | 1 | 1 | g9324.t1  |
| High | ATYVGVSTPQTTfHTYTVNWQR     | 2  | 1 | 1 | g2989.t1  |
| High | LAALAATVGVDEK              | 1  | 1 | 1 | g8672.t1  |
| High | VLTASVPSDSEVLVEYTG         | 1  | 1 | 1 | g1197.t1  |
| High | STSSSSSNYNLLPYQPGLLTLA     | 1  | 1 | 1 | g7927.t1  |
| High | LALIQLASGADK               | 1  | 1 | 1 | g2727.t1  |
| High | YQYGGYAFYDTK               | 1  | 1 | 1 | g9290.t1  |
| High | YVEGPWGGGNAmVPHmSGTSIDA    | 1  | 1 | 1 | g8017.t1  |
| High | DTLYSLASGAGK               | 1  | 1 | 1 | g727.t1   |
| High | STGAGSLSVWMHNFNDIQYK       | 1  | 1 | 1 | g10153.t1 |
| High | LGDFTASPSDR                | 1  | 1 | 1 | g8103.t1  |
| High | GYGGDVWFPQPAPK             | 1  | 1 | 1 | g8017.t1  |
| High | NALESTEPSVEAK              | 1  | 1 | 1 | g2794.t1  |
| High | mSTYPQMTNDAYSPTSQTFSHDDIK  | 2  | 1 | 1 | g4076.t1  |
| High | GAHVALGPVAGPLGR            | 2  | 1 | 1 | g9150.t1  |
| High | SLFQDAINKVNTASNNK          | 1  | 1 | 1 | g10182.t1 |
| High | FGVSVGPYSDFK               | 2  | 1 | 1 | g4355.t1  |
| High | TSSADYDADMQR               | 1  | 1 | 1 | g6554.t1  |
| High | KIPSELPFLTNSVR             | 1  | 1 | 1 | g5593.t1  |
| High | SLcmQDSPLGVR               | 2  | 1 | 1 | g377.t1   |
| High | DHGSFIQVDGTSASAPTIAAIISDLN | 1  | 1 | 1 | g8103.t1  |
| High | ASNLDfSQWAGK               | 1  | 1 | 1 | g5860.t1  |
| High | GTGLSSTITSQTLAR            | 1  | 1 | 1 | g7845.t1  |
| High | VDDLlVFLDR                 | 2  | 1 | 1 | g4603.t1  |
| High | GPGFSGSGSQDQGTK            | 1  | 1 | 1 | g608.t1   |
| High | TASSLSAALDAK               | 10 | 1 | 1 | g3995.t1  |
| High | GNIEGSTPQTPNYYR            | 1  | 1 | 1 | g4704.t1  |
| High | FELSLVGNEDEVK              | 2  | 1 | 1 | g9148.t1  |
| High | YVTTDcGWTVADR              | 1  | 1 | 1 | g2125.t1  |
| High | IALEEAFALPR                | 2  | 1 | 1 | g4411.t1  |
| High | KGWDAVSGWGTPNFPK           | 1  | 1 | 1 | g9511.t1  |
| High | GFPDVSAQAHAYIVR            | 1  | 1 | 1 | g8103.t1  |

|      |                            |   |   |   |           |
|------|----------------------------|---|---|---|-----------|
| High | SYPIYQDSNNLAIR             | 4 | 1 | 1 | g2159.t1  |
| High | TGTLEDAVDTR                | 1 | 1 | 1 | g456.t1   |
| High | SASPIHLQPVNAAGER           | 3 | 1 | 1 | g1116.t1  |
| High | NLFASSmmQATR               | 1 | 1 | 1 | g9290.t1  |
| High | TDGQGNVGSVQDK              | 1 | 1 | 1 | g2572.t1  |
| High | IGPAVATGNTVVLK             | 1 | 1 | 1 | g5497.t1  |
| High | NNmcDFVNAFDNFANPDYSVPSVPT  | 1 | 1 | 1 | g9673.t1  |
| High | LGISGYLEQYAR               | 1 | 1 | 1 | g8103.t1  |
| High | LVDPLADAATcK               | 1 | 1 | 1 | g608.t1   |
| High | GLESALQVSR                 | 1 | 1 | 1 | g2178.t1  |
| High | NVLAFTILSDGIPIIYAGQEQHYSGS | 2 | 1 | 1 | g2159.t1  |
| High | FHPLPLGSDIPSDDLAK          | 1 | 1 | 1 | g4148.t1  |
| High | HTNTIFASSTK                | 1 | 1 | 1 | g6228.t1  |
| High | LSVQQILTPAIELAEK           | 2 | 1 | 1 | g2465.t1  |
| High | SINGYPLPGGAWAR             | 1 | 1 | 1 | g6145.t1  |
| High | DNIAAFGGDPDR               | 1 | 1 | 1 | g10240.t1 |
| High | HALDLDFVHGcAPK             | 1 | 1 | 1 | g8480.t1  |
| High | NFVTDETLDLLVK              | 1 | 1 | 1 | g5215.t1  |
| High | GAGPNFGAVTSAVVK            | 2 | 1 | 1 | g2283.t1  |
| High | NEAYYQKFPEDAER             | 1 | 1 | 1 | g7845.t1  |
| High | mIEDNDSEQPFR               | 1 | 1 | 1 | g7148.t1  |
| High | QNVPIPSYLFVASGDLTEAPVGPR   | 1 | 1 | 1 | g7147.t1  |
| High | AVAEVYGSSDSQEK             | 1 | 1 | 1 | g4318.t1  |
| High | NTPIYQDSNTIAMR             | 1 | 1 | 1 | g3279.t1  |
| High | AVTVGASTLADER              | 1 | 1 | 1 | g2575.t1  |
| High | SVDPSLGLIDPDVK             | 2 | 1 | 1 | g3202.t1  |
| High | TLNDLVAQATK                | 2 | 1 | 1 | g1372.t1  |
| High | NVSNEPmQVDGK               | 1 | 1 | 1 | g5215.t1  |
| High | SLGAAEDVNLVR               | 1 | 1 | 1 | g7301.t1  |
| High | AAASKPAALVDSSGK            | 2 | 1 | 1 | g3077.t1  |
| High | LNFTVGSNVGSR               | 1 | 1 | 1 | g2234.t1  |
| High | LIDNFVIDLENSLGVK           | 1 | 1 | 1 | g7294.t1  |
| High | AAEIPSFVWLDTAAK            | 1 | 1 | 1 | g5707.t1  |
| High | DLLVGPPLTISAVQVLK          | 2 | 1 | 1 | g5328.t1  |
| High | YYGASIPTEDFSTESLR          | 1 | 1 | 1 | g5245.t1  |
| High | TAVWSEIPQLGK               | 2 | 1 | 1 | g2384.t1  |
| High | IAVQNSIVLPTQYSWTHR         | 1 | 1 | 1 | g3685.t1  |
| High | LNLLLDAAGEYK               | 1 | 1 | 1 | g7148.t1  |
| High | AWSDALEWSGHEK              | 2 | 1 | 1 | g3202.t1  |
| High | TPIVEYAEQDGR               | 1 | 1 | 1 | g1325.t1  |
| High | TIYNVGDAFLPK               | 1 | 1 | 1 | g9290.t1  |
| High | AVGSDYWDVDETGR             | 1 | 1 | 1 | g10153.t1 |
| High | SLcMQDSPLGVR               | 1 | 1 | 1 | g377.t1   |
| High | GVmTILDNHVSR               | 4 | 1 | 1 | g5860.t1  |
| High | NWVFPDLLWYNR               | 1 | 1 | 1 | g6554.t1  |
| High | TNIAEWYDGTK                | 2 | 1 | 1 | g3995.t1  |
| High | DGSTGPFVIALR               | 3 | 1 | 1 | g1116.t1  |
| High | YAATELEDLEIVDNKHK          | 1 | 1 | 1 | g3202.t1  |
| High | NANLYSSHPIYLEmR            | 1 | 1 | 1 | g9290.t1  |
| High | NEISDIAEPR                 | 1 | 1 | 1 | g1180.t1  |
| High | YYcAVFLIDPK                | 1 | 1 | 1 | g1079.t1  |
| High | SAFAIVNTGAIR               | 1 | 1 | 1 | g8480.t1  |
| High | FAYYTSYSEAK                | 1 | 1 | 1 | g3279.t1  |
| High | LGGLmYcTPTER               | 1 | 1 | 1 | g4461.t1  |
| High | TAEFASSWYNR                | 1 | 1 | 1 | g3954.t1  |
| High | LYHSEAILLPDGR              | 1 | 1 | 1 | g4355.t1  |
| High | GPYFLENDAGTK               | 1 | 1 | 1 | g216.t1   |
| High | TSSADYDADmQR               | 2 | 1 | 1 | g6554.t1  |
| High | LRTSLPSNPNIYGLGEDSDSFK     | 1 | 1 | 1 | g8295.t1  |

|      |                            |   |   |   |           |
|------|----------------------------|---|---|---|-----------|
| High | VQSDFESEFK                 | 1 | 1 | 1 | g10182.t1 |
| High | AGmASImcSYNR               | 2 | 1 | 1 | g9150.t1  |
| High | AFNHYFGTmAGVR              | 1 | 1 | 1 | g9673.t1  |
| High | TATQEFQIAVLGPEEPQRPQVR     | 2 | 1 | 1 | g4704.t1  |
| High | SQSYVYITPTYLR              | 2 | 1 | 1 | g8384.t1  |
| High | NHADITAPFQEFYR             | 1 | 1 | 1 | g9290.t1  |
| High | IANVLNETDDAEK              | 1 | 1 | 1 | g5548.t1  |
| High | TSILAPGDSETLSLPVTR         | 1 | 1 | 1 | g3139.t1  |
| High | LSYENIPTVVFSHPEVGTIGLTEPQ/ | 1 | 1 | 1 | g3006.t1  |
| High | VLmVLYDGGEHAK              | 1 | 1 | 1 | g8017.t1  |
| High | YVESGLNDHGDR               | 2 | 1 | 1 | g1180.t1  |
| High | ALGVTQLFAPLADLAR           | 1 | 1 | 1 | g6753.t1  |
| High | SNFHPVGTASmLPR             | 1 | 1 | 1 | g2143.t1  |
| High | YLQLTPTDAVQGR              | 1 | 1 | 1 | g3578.t1  |
| High | GQDNTVQFVR                 | 1 | 1 | 1 | g6228.t1  |
| High | LGNTDFYGASK                | 1 | 1 | 1 | g2234.t1  |
| High | VDmTTAQHTSLFR              | 1 | 1 | 1 | g6145.t1  |
| High | AGVDTDFSEIR                | 1 | 1 | 1 | g6537.t1  |
| High | ALMQLNFETLLK               | 1 | 1 | 1 | g10298.t1 |
| High | IDVSSWDVVK                 | 1 | 1 | 1 | g9150.t1  |
| High | TAYYPTSPSSTISPLGANcAIPLGAP | 3 | 1 | 1 | g7045.t1  |
| High | ELYDVDEVLFTTDINPTLAHLASK   | 1 | 1 | 1 | g7148.t1  |
| High | FASYTSDFSLAK               | 1 | 1 | 1 | g2159.t1  |
| High | SILDTLPGAKPLSK             | 1 | 1 | 1 | g8384.t1  |
| High | STYAQNVAAmLQSTGLDGVDDIDW   | 1 | 1 | 1 | g3385.t1  |
| High | SLVDTQQHLGWLPDcR           | 1 | 1 | 1 | g6145.t1  |
| High | NVDGALPLTGSER              | 3 | 1 | 1 | g377.t1   |
| High | IKPPQIGSYGQILEWR           | 1 | 1 | 1 | g4461.t1  |
| High | AADSDGEEYTAR               | 1 | 1 | 1 | g4965.t1  |
| High | WEELLTLGPR                 | 1 | 1 | 1 | g6554.t1  |
| High | ILSQTAVDLIFTNFNAR          | 2 | 1 | 1 | g4704.t1  |
| High | DIQAWEVVPLGPFNAK           | 2 | 1 | 1 | g6147.t1  |
| High | FIEAQLDAYEK                | 1 | 1 | 1 | g7206.t1  |
| High | LASASSQGYPALR              | 2 | 1 | 1 | g4461.t1  |
| High | IYVTGESYAGR                | 1 | 1 | 1 | g699.t1   |
| High | GGNIVIPDQSWHTWR            | 2 | 1 | 1 | g1839.t1  |
| High | IGISFISIDTAK               | 1 | 1 | 1 | g9337.t1  |
| High | NVQYVQTFTDR                | 1 | 1 | 1 | g9063.t1  |
| High | AYIDSIVAQLK                | 1 | 1 | 1 | g5707.t1  |
| High | SQSIYFLLTDR                | 1 | 1 | 1 | g3279.t1  |
| High | DEVDTYVVS LVQSLGTEGK       | 1 | 1 | 1 | g5705.t1  |
| High | QLAANVFPNPVTSR             | 1 | 1 | 1 | g7206.t1  |
| High | GKLPA GSVITVEPGVYFcR       | 1 | 1 | 1 | g7148.t1  |
| High | ATVNLGFIDVAR               | 1 | 1 | 1 | g5625.t1  |
| High | AHFALWAI mK                | 2 | 1 | 1 | g2384.t1  |
| High | HIDGFGVHTYR                | 1 | 1 | 1 | g9148.t1  |
| High | SDSTLQIFQIR                | 1 | 1 | 1 | g7627.t1  |
| High | ASSIVVSGTPIIRPTGQILANPTATP | 1 | 1 | 1 | g6147.t1  |
| High | AGFAGDDAPR                 | 1 | 1 | 1 | g8069.t1  |
| High | GGVNDLLVPFLK               | 1 | 1 | 1 | g4734.t1  |
| High | QNELLVSEFADR               | 1 | 1 | 1 | g456.t1   |
| High | LDETWWcIR                  | 1 | 1 | 1 | g6836.t1  |
| High | DNAcTATNPPAPAAGSGTHIK      | 1 | 1 | 1 | g9076.t1  |
| High | IAWVGEQSAIPNK              | 1 | 1 | 1 | g3307.t1  |
| High | LQSSQSGQLNVK               | 1 | 1 | 1 | g4461.t1  |
| High | YTLEQIIDAVR                | 1 | 1 | 1 | g5733.t1  |
| High | SWEVVYDAYK                 | 2 | 1 | 1 | g2283.t1  |
| High | AGQTATNKPVLmFALPHHVESFDA   | 1 | 1 | 1 | g10078.t1 |
| High | SIYFLLTDR                  | 1 | 1 | 1 | g2159.t1  |

|      |                            |   |   |   |           |
|------|----------------------------|---|---|---|-----------|
| High | ADPDYYTWTTR                | 2 | 1 | 1 | g2158.t1  |
| High | FNGDDSLGDSSR               | 4 | 1 | 1 | g5915.t1  |
| High | SGIYTIQAPVR                | 1 | 1 | 1 | g2794.t1  |
| High | NDLVFGSNAELR               | 1 | 1 | 1 | g4318.t1  |
| High | NPYFSTWLANAR               | 1 | 1 | 1 | g456.t1   |
| High | DQPNEFGYEPGYR              | 1 | 1 | 1 | g6228.t1  |
| High | ALVVSVDHPmWIYEVDR          | 1 | 1 | 1 | g7487.t1  |
| High | NQDVYmPLSGLR               | 1 | 1 | 1 | g7301.t1  |
| High | YIDQNETEPVR                | 1 | 1 | 1 | g6228.t1  |
| High | DAIIQADQNR                 | 2 | 1 | 1 | g571.t1   |
| High | NSPTGIAASAGIGK             | 1 | 1 | 1 | g10182.t1 |
| High | VTGILFENK                  | 1 | 1 | 1 | g10078.t1 |
| High | TASGDISYDPAAGGIHSAQLAR     | 1 | 1 | 1 | g8260.t1  |
| High | LTGDLVFWK                  | 1 | 1 | 1 | g7783.t1  |
| High | VLDPLVAGPAR                | 2 | 1 | 1 | g2149.t1  |
| High | FTDLGLNTR                  | 2 | 1 | 1 | g608.t1   |
| High | LHIAEPTISLS                | 2 | 1 | 1 | g5915.t1  |
| High | TSALSFLSYSTK               | 1 | 1 | 1 | g395.t1   |
| High | TSNVGTFTPLKK               | 1 | 1 | 1 | g9148.t1  |
| High | YLGSGQDWYR                 | 2 | 1 | 1 | g4474.t1  |
| High | cINWAGHIDLR                | 1 | 1 | 1 | g5860.t1  |
| High | VLVSGSDPEDATHPEEYR         | 1 | 1 | 1 | g4355.t1  |
| High | DLDLNTNYK                  | 5 | 1 | 1 | g3995.t1  |
| High | TILAAYNEAR                 | 1 | 1 | 1 | g4355.t1  |
| High | EGGPVFLLESGETSGEDRLPYLEK   | 1 | 1 | 1 | g5245.t1  |
| High | AQImDYATR                  | 2 | 1 | 1 | g1180.t1  |
| High | GVAAYLFR                   | 1 | 1 | 1 | g216.t1   |
| High | SPYAYLANPEDERAQYEDTKTm     | 1 | 1 | 1 | g216.t1   |
| High | YLGEDVFLQGV                | 1 | 1 | 1 | g7301.t1  |
| High | QTYVDAATTLR                | 1 | 1 | 1 | g4148.t1  |
| High | VVGESYPTIMSGSK             | 2 | 1 | 1 | g9324.t1  |
| High | TmHELYLWPFADAVR            | 1 | 1 | 1 | g6857.t1  |
| High | TNIAEWDYGTGKDLSTYHK        | 2 | 1 | 1 | g3995.t1  |
| High | LILSSDSKTEVVQSR            | 1 | 1 | 1 | g1180.t1  |
| High | TFYGTYYVPQAIDR             | 1 | 1 | 1 | g9511.t1  |
| High | IKEQIDGMALSK               | 1 | 1 | 1 | g4076.t1  |
| High | ASGSLYLDGK                 | 2 | 1 | 1 | g8295.t1  |
| High | YSYMIHAEDADWQTK            | 1 | 1 | 1 | g4633.t1  |
| High | GRTTIFYSLAGDIR             | 1 | 1 | 1 | g5915.t1  |
| High | WNYLEPYTR                  | 1 | 1 | 1 | g6228.t1  |
| High | ALNTNYDGSAGVFTK            | 1 | 1 | 1 | g4318.t1  |
| High | TWYLAYAGLK                 | 1 | 1 | 1 | g10078.t1 |
| High | GSTLLEDFIR                 | 2 | 1 | 1 | g9148.t1  |
| High | IDFSLPVPmVER               | 2 | 1 | 1 | g3149.t1  |
| High | GQQQVEcTAK                 | 1 | 1 | 1 | g1079.t1  |
| High | DILPITPGVVEGWGK            | 2 | 1 | 1 | g4965.t1  |
| High | ELVDYLHENDQHYYVvmVDPPIISVD | 1 | 1 | 1 | g9290.t1  |
| High | IISNTQANK                  | 1 | 1 | 1 | g2143.t1  |
| High | GPLNEGGLYAER               | 2 | 2 | 1 | g4603.t1  |
| High | SITVDYLSLPcK               | 1 | 1 | 1 | g5245.t1  |
| High | FTAIFGSDAR                 | 1 | 1 | 1 | g6857.t1  |
| High | LNILHWHLDDSQSWPVR          | 2 | 1 | 1 | g4076.t1  |
| High | YRVEDVWTGK                 | 1 | 1 | 1 | g2384.t1  |
| High | cGLPGDFDTPEYAR             | 1 | 2 | 1 | g3954.t1  |
| High | ILPFTVPGSPINEQGLK          | 2 | 1 | 1 | g8384.t1  |
| High | TIDESIVVVQQPEESWK          | 1 | 1 | 1 | g8261.t1  |
| High | DNTELVYLR                  | 1 | 1 | 1 | g8260.t1  |
| High | NAISDAWER                  | 1 | 1 | 1 | g4076.t1  |
| High | LEPVDHQIILNTGHTTINGVSR     | 1 | 1 | 1 | g7482.t1  |



|                                |   |   |             |
|--------------------------------|---|---|-------------|
| High SIYNDALWNR                | 1 | 1 | 1 g1180.t1  |
| High NTPIIQDSNTIAmRK           | 2 | 1 | 1 g3279.t1  |
| High GIWYDFWTGEK               | 1 | 1 | 1 g9290.t1  |
| High SNYWQPLLYHIR              | 1 | 1 | 1 g4013.t1  |
| High VAEFFDVPLNYSKPNEER        | 1 | 1 | 1 g7845.t1  |
| High VLDGSGNVVK                | 1 | 1 | 1 g9990.t1  |
| High YNGENYcSLWR               | 1 | 1 | 1 g571.t1   |
| High NFGAFNDVWVR               | 1 | 1 | 1 g2927.t1  |
| High DLEDAVSGYK                | 1 | 1 | 1 g3728.t1  |
| High NPFSFAIQR                 | 3 | 1 | 1 g8295.t1  |
| High NLLVATIQR                 | 1 | 1 | 1 g2149.t1  |
| High VVDASSFPFLPPGHPQALVYALAEK | 1 | 1 | 1 g3369.t1  |
| High SEEYEVVHR                 | 1 | 1 | 1 g8480.t1  |
| High VTDTIYIPPGSR              | 8 | 1 | 1 g9324.t1  |
| High EGYENLTTAPK               | 3 | 1 | 1 g7148.t1  |
| High ISLLGYVER                 | 1 | 1 | 1 g3669.t1  |
| High IVLGVLTAAAGNSWQPTTVLSTTI  | 1 | 1 | 1 g9063.t1  |
| High FSTPGVSGALVPR             | 3 | 1 | 1 g727.t1   |
| High ENLAVASTDNAK              | 1 | 1 | 1 g10182.t1 |
| High DISSGDLIR                 | 1 | 1 | 1 g3707.t1  |
| High VPTWATGSSFFSINSGSHEDVLAD  | 2 | 1 | 1 g5915.t1  |
| High FNYWFPLDGDKK              | 1 | 1 | 1 g2283.t1  |
| High NTDSVLPLSGK               | 1 | 1 | 1 g6857.t1  |
| High DELGTLGQAR                | 1 | 1 | 1 g4734.t1  |
| High FDQDGV TIR                | 1 | 1 | 1 g2149.t1  |
| High ILPVEDVPITPLGK            | 2 | 1 | 1 g9148.t1  |
| High NGATVFQGTSLK              | 1 | 1 | 1 g6554.t1  |
| High ANVAGAGTSVR               | 1 | 1 | 1 g4318.t1  |
| High FVFNTEAHPFK               | 3 | 1 | 1 g4633.t1  |
| High DHSNTSPPHELYR             | 1 | 1 | 1 g1266.t1  |
| High TLHELYLWPFYEGVK           | 1 | 1 | 1 g9150.t1  |
| High FSATTELYR                 | 3 | 1 | 1 g5993.t1  |
| High DIYKPYIQAYK               | 2 | 1 | 1 g9061.t1  |
| High QGIWPAFWILGDSLR           | 1 | 1 | 1 g1839.t1  |
| High LNDNFGVPK                 | 1 | 1 | 1 g8384.t1  |
| High NLPLQQTLALK               | 6 | 1 | 1 g377.t1   |
| High GNAFFQGDTR                | 1 | 1 | 1 g608.t1   |
| High VGVSLVSTEK                | 1 | 1 | 1 g4882.t1  |
| High LLYETGLPVR                | 1 | 1 | 1 g6249.t1  |
| High TGQNVYDVR                 | 1 | 1 | 1 g3202.t1  |
| High SQYYLSFmSEVLK             | 1 | 1 | 1 g8384.t1  |
| High FGTNAIANK                 | 1 | 1 | 1 g1839.t1  |
| High AVSFSSGGFSER              | 1 | 1 | 1 g8103.t1  |
| High DVAIQYSETVGK              | 1 | 1 | 1 g1266.t1  |
| High LLVEYQTNRSR               | 1 | 1 | 1 g8295.t1  |
| High IPVPELWIDILEK             | 2 | 1 | 1 g7406.t1  |
| High STDTPVFFIR                | 1 | 1 | 1 g1180.t1  |
| High WPLVTAAAQK                | 1 | 1 | 1 g8295.t1  |
| High TFGESLTLLR                | 1 | 1 | 1 g290.t1   |
| High TSAYWQNLFK                | 1 | 1 | 1 g6145.t1  |
| High GIQQSDDDG VVK             | 1 | 1 | 1 g2003.t1  |
| High RPAERPFIISR               | 3 | 1 | 1 g8295.t1  |
| High LTFWTS LDAK               | 1 | 1 | 1 g8260.t1  |
| High QILGLISTAASK              | 1 | 1 | 1 g2149.t1  |
| High GSWLVNTAR                 | 1 | 1 | 1 g8017.t1  |
| High NILD SYFSGR               | 1 | 1 | 1 g8017.t1  |
| High TTAGLNAWHGGDDL VVK        | 1 | 1 | 1 g3139.t1  |
| High EATPFADDAPGPR             | 1 | 1 | 1 g5245.t1  |
| High NGVTTYTVFEHAATGAK         | 1 | 1 | 1 g4362.t1  |

|      |                            |   |   |   |           |
|------|----------------------------|---|---|---|-----------|
| High | VTIVNSPFSFK                | 1 | 1 | 1 | g1266.t1  |
| High | NDSGTFFIK                  | 1 | 1 | 1 | g8248.t1  |
| High | DNGIFVNSR                  | 1 | 1 | 1 | g6145.t1  |
| High | LGAGmLTAER                 | 1 | 1 | 1 | g7845.t1  |
| High | EYTVQLEAHDVAVLK            | 2 | 1 | 1 | g2384.t1  |
| High | HQGYLPDGR                  | 1 | 1 | 1 | g9337.t1  |
| High | DALVSVQDQR                 | 2 | 1 | 1 | g2384.t1  |
| High | DFVDTVTGDR                 | 1 | 1 | 1 | g5495.t1  |
| High | QEYDESGPSIVHR              | 1 | 1 | 1 | g8069.t1  |
| High | EISSDGNTQTIDVIYPAFPFFLYTSP | 1 | 1 | 1 | g456.t1   |
| High | YSGGQEGVDAK                | 1 | 1 | 1 | g4318.t1  |
| High | VLQLSSGDcSK                | 1 | 1 | 1 | g4461.t1  |
| High | IALPSFDEEAVLK              | 2 | 1 | 1 | g4878.t1  |
| High | DLQLmNIAR                  | 1 | 1 | 1 | g7294.t1  |
| High | STFISQINR                  | 1 | 1 | 1 | g9148.t1  |
| High | FFGEFPNLR                  | 1 | 1 | 1 | g10240.t1 |
| High | TLPNIPGAVNNDLGGR           | 1 | 1 | 1 | g4355.t1  |
| High | APNPGEILK                  | 1 | 1 | 1 | g2465.t1  |
| High | SPAGANQWVAK                | 1 | 1 | 1 | g4318.t1  |
| High | QWQFDISDALK                | 1 | 1 | 1 | g3149.t1  |
| High | LFTTVAALR                  | 1 | 1 | 1 | g4704.t1  |
| High | YGLPLDSR                   | 1 | 1 | 1 | g456.t1   |
| High | VPSWIVSPWTR                | 1 | 1 | 1 | g9673.t1  |
| High | YFALSQFTR                  | 1 | 1 | 1 | g727.t1   |
| High | ILDFADISWSTNR              | 1 | 1 | 1 | g6921.t1  |
| High | GVDmGAEFR                  | 1 | 1 | 1 | g9150.t1  |
| High | TIETWYGR                   | 2 | 1 | 1 | g10375.t1 |
| High | YDPDYFFYALK                | 1 | 1 | 1 | g10153.t1 |
| High | LISLVKPFTDALTELGIK         | 1 | 1 | 1 | g3187.t1  |
| High | YDDLDTFLK                  | 1 | 1 | 1 | g8103.t1  |
| High | YWLQAQDHTGEAR              | 1 | 1 | 1 | g8428.t1  |
| High | GNmmLALLR                  | 1 | 1 | 1 | g10078.t1 |
| High | LIGAESVLGR                 | 1 | 1 | 1 | g2572.t1  |
| High | NAGKPcLLEEGSK              | 1 | 1 | 1 | g1408.t1  |
| High | VmLmmGGAAR                 | 1 | 1 | 1 | g9063.t1  |
| High | GDDLWADR                   | 1 | 1 | 1 | g4745.t1  |
| High | EVILSAGSLK                 | 1 | 1 | 1 | g2143.t1  |
| High | LFGPPEFK                   | 1 | 1 | 1 | g3006.t1  |
| High | VGAGIVGYQImEAAHEK          | 1 | 1 | 1 | g10153.t1 |
| High | DAVYTEHAK                  | 1 | 2 | 1 | g2935.t1  |
| High | QVIGSLTEGR                 | 1 | 1 | 1 | g9673.t1  |
| High | DFLPYYIATFK                | 1 | 1 | 1 | g4745.t1  |
| High | VAGSTTGLR                  | 1 | 1 | 1 | g9324.t1  |
| High | ELPGFPDDLQPPSAK            | 1 | 1 | 1 | g9290.t1  |
| High | YVSNSYVR                   | 1 | 1 | 1 | g5915.t1  |
| High | SPLVIGAALK                 | 1 | 1 | 1 | g2125.t1  |
| High | DGmTPVTVK                  | 2 | 1 | 1 | g608.t1   |
| High | DcAHGSDVSTFVDAVEK          | 1 | 1 | 1 | g6836.t1  |
| High | YSDSSQLR                   | 1 | 1 | 1 | g7540.t1  |
| High | NPTGTIHEK                  | 1 | 1 | 1 | g4411.t1  |
| High | IVHAANLDGR                 | 1 | 1 | 1 | g7045.t1  |
| High | TTWGVFLTVR                 | 2 | 1 | 1 | g10298.t1 |
| High | IDVGYYAHPSFVEADELK         | 1 | 1 | 1 | g10174.t1 |
| High | QSNWYHFVR                  | 1 | 1 | 1 | g456.t1   |
| High | ASLLIPGR                   | 1 | 1 | 1 | g3307.t1  |
| High | VAEDGVTPLGDAVQLIDRDDSDGP   | 1 | 1 | 1 | g4208.t1  |
| High | NVDNFSFLK                  | 1 | 1 | 1 | g4362.t1  |
| High | SLDSYEFK                   | 1 | 1 | 1 | g7147.t1  |
| High | SPDPNTGLSR                 | 1 | 1 | 1 | g4148.t1  |

|      |                           |   |   |   |                   |
|------|---------------------------|---|---|---|-------------------|
| High | ASSTLPPTPDEDLcNcmSK       | 4 | 1 | 1 | g7641.t1          |
| High | RTLmLDSGIYR               | 1 | 1 | 1 | g4965.t1          |
| High | FFVYDQSR                  | 1 | 1 | 1 | g4633.t1          |
| High | FSDSDDHVLQQFK             | 1 | 1 | 1 | g7301.t1          |
| High | IDSLAAIGK                 | 1 | 1 | 1 | g4965.t1          |
| High | QLEFLLGR                  | 1 | 1 | 1 | g8294.t1          |
| High | SGVTTNIQK                 | 1 | 1 | 1 | g4603.t1          |
| High | FNWGADEVK                 | 1 | 1 | 1 | g6228.t1          |
| High | LPEGVTAPDILPGLLKR         | 1 | 1 | 1 | g290.t1           |
| High | SLFQDAINK                 | 1 | 1 | 1 | g10182.t1         |
| High | SGHWTGDNISSWDHYR          | 1 | 1 | 1 | g9290.t1          |
| High | TVPVTQSFVWSGNK            | 1 | 1 | 1 | g6228.t1          |
| High | QDDLTQDWR                 | 1 | 1 | 1 | g5245.t1          |
| High | VYGVQNLNLR                | 1 | 1 | 1 | g3369.t1          |
| High | TLHEIYLWPFAGVK            | 1 | 1 | 1 | g3139.t1          |
| High | DSAFITYK                  | 2 | 1 | 1 | g3279.t1          |
| High | SSGNLTFmR                 | 1 | 1 | 1 | g3202.t1          |
| High | TLTAAEAGDYFPQTPmRLR       | 1 | 1 | 1 | g2989.t1          |
| High | LTIFSGEVHPFR              | 1 | 1 | 1 | g4603.t1          |
| High | FSLVSGGVR                 | 1 | 1 | 1 | g3578.t1          |
| High | TLmLDSGIYR                | 1 | 1 | 1 | g4965.t1          |
| High | QTLSSIHGSSLDVR            | 1 | 1 | 1 | g8260.t1          |
| High | VDWTGGARPR                | 1 | 1 | 1 | g9487.t1          |
| High | APEVEDLQLHIPGVK           | 1 | 1 | 1 | g3006.t1          |
| High | TVYVGNSSR                 | 2 | 1 | 1 | g377.t1           |
| High | GAIVVKEDVAEAVK            | 1 | 1 | 1 | g8017.t1          |
| High | AYSPPAYPAPWASGAGEWAQAHD   | 1 | 1 | 1 | g377.t1           |
| High | HLQLAIR                   | 1 | 2 | 1 | g1937.t1          |
| High | TSIVDTAVSR                | 1 | 1 | 1 | g6753.t1          |
| High | LGDWPNFPDFTVPGV           | 1 | 1 | 1 | g4355.t1          |
| High | AWVNmLVR                  | 2 | 1 | 1 | g10078.t1         |
| High | APIGDRPSLAEIEEALK         | 1 | 1 | 1 | g290.t1           |
| High | SSSVAIVAR                 | 1 | 1 | 1 | g7811.t1          |
| High | SAGTELSAR                 | 1 | 1 | 1 | g2140.t1          |
| High | YWEVGGVR                  | 1 | 1 | 1 | g7148.t1          |
| High | GNLGIAFYAK                | 1 | 1 | 1 | g3385.t1          |
| High | GTLVGPNVYSSIGVLGITGGHSDIH | 1 | 1 | 1 | g3307.t1          |
| High | YIDADILEK                 | 1 | 1 | 1 | g7148.t1          |
| High | AASIYLDALK                | 1 | 1 | 1 | g1180.t1          |
| High | GIYWcPWcDGYEHR            | 1 | 1 | 1 | g4965.t1          |
| High | GVLLDVSR                  | 1 | 1 | 1 | g2794.t1          |
| High | FVTNDGSSK                 | 1 | 1 | 1 | g9148.t1          |
| High | NLVPAASEDTR               | 1 | 1 | 1 | g4226.t1          |
| High | QQHIDLLSSGNHELYK          | 1 | 1 | 1 | g8480.t1          |
| High | VSLDSNGKPTGSR             | 1 | 1 | 1 | g3685.t1          |
| High | FATLVYTVHELANNPDLAASLDGL  | 1 | 1 | 1 | g10078.t1         |
| High | VLIDLFR                   | 2 | 1 | 1 | g2140.t1          |
| High | AQFQGLSGNNHFANQNEQHGLK    | 1 | 1 | 1 | g10326.t1         |
| High | ELETPGAGSAHDSSTAGLIK      | 1 | 1 | 1 | g5215.t1          |
| High | EIGFTVQEGSLTEHVVK         | 1 | 1 | 1 | g3149.t1          |
| High | TWTLDPERFPLHK             | 8 | 2 | 2 | g8295.t1;g9290.t1 |
| High | IVLGSQQLALTKPFTLAEHEEK    | 1 | 1 | 1 | g1180.t1          |
| High | RIVLGTGmKDILPITPGVVEGWGK  | 2 | 1 | 1 | g4965.t1          |
| High | LFLLYNDLSVGSLSNWADR       | 1 | 1 | 1 | g5446.t1          |
| High | NWEGFAPDPVLTGQMMASTIEGM   | 1 | 1 | 1 | g377.t1           |
| High | KQPDYANYPAER              | 1 | 1 | 1 | g8428.t1          |
| High | SRVTFDSQISTTQVR           | 2 | 1 | 1 | g5548.t1          |
| High | LPEHEPAGDWLVTYDVGTR       | 1 | 1 | 1 | g10375.t1         |
| High | DGHNYATLNTALVAPLSR        | 1 | 1 | 1 | g3369.t1          |

|      |                            |   |   |   |           |
|------|----------------------------|---|---|---|-----------|
| High | EDIDALAVPVQFLAPEIDPVYTPELK | 1 | 1 | 1 | g9160.t1  |
| High | YVNIDDcWSVK                | 1 | 1 | 1 | g2384.t1  |
| High | SYANSQLSGLTK               | 1 | 1 | 1 | g1751.t1  |
| High | WQLYPTLAGYDSK              | 1 | 1 | 1 | g5712.t1  |
| High | AIKDAYEVAmLR               | 2 | 1 | 1 | g7148.t1  |
| High | SGGTcVNVGcVPK              | 1 | 1 | 1 | g3006.t1  |
| High | IVTGPLYLPR                 | 1 | 1 | 1 | g7031.t1  |
| High | QYTLTIPQGYNPSEPYK          | 1 | 1 | 1 | g9076.t1  |
| High | GSEEELEKLR                 | 1 | 1 | 1 | g7148.t1  |
| High | SLHDEPDNVAmIK              | 1 | 1 | 1 | g8248.t1  |
| High | NVmDDANIPSLALPYLGFLDVDD    | 1 | 1 | 1 | g6658.t1  |
| High | DSYVGDEAQSK                | 1 | 1 | 1 | g8069.t1  |
| High | ALYLGPEVPAEVLTWQDPVPAVNH   | 1 | 1 | 1 | g4318.t1  |
| High | NLVATADDVDGTK              | 1 | 1 | 1 | g4567.t1  |
| High | EINQHVDVR                  | 2 | 1 | 1 | g377.t1   |
| High | WAMLGAWYPFYR               | 1 | 1 | 1 | g8295.t1  |
| High | SAPDAPQVLFPGDAR            | 1 | 1 | 1 | g5733.t1  |
| High | LLESEAYFR                  | 1 | 1 | 1 | g9290.t1  |
| High | GSNFIPDAFWPR               | 2 | 1 | 1 | g3149.t1  |
| High | RImGAVHGEAHR               | 1 | 1 | 1 | g7147.t1  |
| High | FNADmTAYTGAWGRPQR          | 1 | 1 | 1 | g8259.t1  |
| High | VQPKPFTVSIPDEQIEELK        | 1 | 1 | 1 | g7783.t1  |
| High | QALPFNGSDTPK               | 1 | 1 | 1 | g7294.t1  |
| High | INEELLAK                   | 1 | 1 | 1 | g3993.t1  |
| High | IGEDNLPQR                  | 3 | 1 | 1 | g4474.t1  |
| High | ALVEGSTFAGR                | 2 | 1 | 1 | g2140.t1  |
| High | SGKDANSLLGTIHTFDPEAAcDDTT  | 1 | 1 | 1 | g8259.t1  |
| High | mVLGmPLYGR                 | 3 | 1 | 1 | g466.t1   |
| High | SVAIVEmQDR                 | 2 | 1 | 1 | g10298.t1 |
| High | LKSQVLDSVNYVLSHQQADGWLGF   | 2 | 1 | 1 | g5915.t1  |
| High | SGGTIGPmTSAQIGLR           | 1 | 1 | 1 | g7627.t1  |
| High | TSHcPYKGEASYVVVK           | 1 | 1 | 1 | g6249.t1  |
| High | KGFFWAQK                   | 1 | 1 | 1 | g9487.t1  |
| High | ELLLEAGxPDLF               | 2 | 1 | 1 | g6857.t1  |
| High | VSAGEWVNR                  | 1 | 1 | 1 | g6537.t1  |
| High | QEYVEQQPGmR                | 1 | 1 | 1 | g4461.t1  |
| High | HLQEETTVDTVYDmASLTK        | 1 | 1 | 1 | g4704.t1  |
| High | RTLYSLASGAGK               | 1 | 1 | 1 | g727.t1   |
| High | SREDAEALVSR                | 1 | 1 | 1 | g2149.t1  |
| High | GGVDYVNK                   | 1 | 1 | 1 | g881.t1   |
| High | SLGLDVAFPPL                | 2 | 1 | 1 | g4704.t1  |
| High | LSYQVVPVTR                 | 1 | 1 | 1 | g571.t1   |
| High | EIGSASIVLLK                | 1 | 1 | 1 | g377.t1   |
| High | QAAQNIWK                   | 1 | 1 | 1 | g3185.t1  |
| High | QFSGPADLAGK                | 1 | 1 | 1 | g1325.t1  |
| High | VDLVFWDK                   | 1 | 1 | 1 | g1325.t1  |
| High | NPDDIVNDIK                 | 1 | 1 | 1 | g10182.t1 |
| High | AEDLPPSmDSYAF              | 1 | 1 | 1 | g3185.t1  |
| High | DQmQYWYR                   | 1 | 1 | 1 | g4745.t1  |
| High | HAFEITDLTDQR               | 1 | 1 | 1 | g4411.t1  |
| High | AVLTTcESTVPTVNG            | 1 | 1 | 1 | g2392.t1  |
| High | EINQHVDVRGDHAK             | 1 | 1 | 1 | g377.t1   |
| High | LVDKDFQEGSYGGHK            | 1 | 1 | 1 | g1180.t1  |
| High | TWSSNNIVR                  | 1 | 1 | 1 | g4704.t1  |
| High | RIDVSSWDVVK                | 1 | 1 | 1 | g9150.t1  |
| High | QLTEDLATFK                 | 1 | 1 | 1 | g9148.t1  |
| High | EIGGASAVLLK                | 1 | 1 | 1 | g9150.t1  |
| High | LDKmFEPGVAK                | 1 | 1 | 1 | g9337.t1  |
| High | KGGSEQTVIR                 | 1 | 1 | 1 | g8260.t1  |

|                                |    |   |                     |
|--------------------------------|----|---|---------------------|
| High EDAGIVLEDNR               | 1  | 1 | 1 g9556.t1          |
| High AINSGVAAAQ                | 1  | 1 | 1 g3385.t1          |
| High IFAINScDGTLTecDAYSTTPGDGP | 1  | 1 | 1 g7811.t1          |
| High GVDYQPGGSSK               | 1  | 1 | 1 g608.t1           |
| High WIGGEWTQ                  | 1  | 1 | 1 g3202.t1          |
| High FHDSSNDPDKR               | 1  | 1 | 1 g8428.t1          |
| High EDAANNYAR                 | 1  | 1 | 1 g4292.t1          |
| High NVKDFGAKGDGSTDDTDAINSAIS  | 1  | 1 | 1 g3077.t1          |
| High AQIMDYEATR                | 1  | 1 | 1 g1180.t1          |
| High GDTFDISR                  | 1  | 1 | 1 g4745.t1          |
| High DLAFDYNSEK                | 1  | 1 | 1 g7206.t1          |
| High LDNGSPLR                  | 1  | 1 | 1 g9063.t1          |
| High LIDAAFER                  | 1  | 1 | 1 g3728.t1          |
| High LYDEAQLAK                 | 2  | 1 | 1 g7845.t1          |
| High ISLNENSIWSGPFLNR          | 1  | 1 | 1 g4461.t1          |
| High NPQPPLLK                  | 1  | 1 | 1 g3993.t1          |
| High WPQVADAAR                 | 3  | 1 | 1 g9290.t1          |
| High NIDNALPLSK                | 2  | 1 | 1 g9150.t1          |
| High ASELLQR                   | 1  | 1 | 1 g7540.t1          |
| High QHGHVPGTHHTELEDNEmIAIDm   | 1  | 1 | 1 g4999.t1          |
| High IGAASVLLK                 | 1  | 1 | 1 g6857.t1          |
| High GSAANmSLGGGK              | 1  | 1 | 1 g2575.t1          |
| High DAGLIAGLNVLR              | 2  | 2 | 1 g2092.t1          |
| High HAGYLPDcR                 | 2  | 1 | 1 g3185.t1          |
| High QVIVVVK                   | 1  | 1 | 1 g6228.t1          |
| High IPIGTSPTLK                | 1  | 1 | 1 g3993.t1          |
| High STDYAVLLLTDVIGHK          | 1  | 1 | 1 g10174.t1         |
| High IDDmAVR                   | 2  | 2 | 2 g377.t1;g6857.t1  |
| High VGAPNGQER                 | 1  | 1 | 1 g7487.t1          |
| High GGGGNAYGVVTK              | 1  | 1 | 1 g559.t1           |
| High DIPYLTAIR                 | 2  | 1 | 1 g7641.t1          |
| High GAYAVIDPHNYGR             | 1  | 1 | 1 g4348.t1          |
| High VVLGTDWTAGENGK            | 1  | 1 | 1 g3307.t1          |
| High LDPLLSPGK                 | 2  | 1 | 1 g2392.t1          |
| High GASLTVEIK                 | 1  | 1 | 1 g3149.t1          |
| High SNFASDPK                  | 1  | 1 | 1 g8535.t1          |
| High SGDLVPLGPR                | 1  | 1 | 1 g8480.t1          |
| High VLYSDYPFSANEK             | 1  | 1 | 1 g3952.t1          |
| High YVDSLPEIK                 | 1  | 1 | 1 g4603.t1          |
| High NGGPNFEQIPINRPR           | 1  | 1 | 1 g9148.t1          |
| High AGTTSVIAR                 | 1  | 1 | 1 g3185.t1          |
| High FASTGDNPR                 | 1  | 1 | 1 g4362.t1          |
| High SFLNEDSAR                 | 1  | 1 | 1 g6228.t1          |
| High SIFPcQDTPDVK              | 1  | 1 | 1 g7147.t1          |
| High GGSIIPLR                  | 10 | 2 | 2 g9290.t1;g8295.t1 |
| High GVAmAEEHR                 | 2  | 1 | 1 g377.t1           |
| High ITANISPR                  | 3  | 1 | 1 g4950.t1          |
| High SVFNTPWIYR                | 1  | 1 | 1 g1180.t1          |
| High FSTVAGSR                  | 1  | 1 | 1 g9148.t1          |
| High TLDRAEFDEGTR              | 1  | 1 | 1 g9490.t1          |
| High YAVLADVYTEDKTR            | 1  | 1 | 1 g6377.t1          |
| High ENPLFGWR                  | 1  | 1 | 1 g7294.t1          |
| High TVNDQISR                  | 1  | 1 | 1 g7668.t1          |
| High NPIPmLQIGESGDTGNVEIQDLILE | 1  | 1 | 1 g3077.t1          |
| High GFFWAQK                   | 1  | 1 | 1 g9487.t1          |
| High QPYISPPVR                 | 1  | 1 | 1 g7294.t1          |
| High SILDPPSGQQDSSSQSDLVFEYTK  | 1  | 1 | 1 g8295.t1          |
| High QSLFYEIDIK                | 1  | 1 | 1 g1079.t1          |
| High GHFVANGNEK                | 1  | 1 | 1 g4603.t1          |

|      |                           |   |   |   |                  |
|------|---------------------------|---|---|---|------------------|
| High | MAELNESSQLGSLSHQNNNNSPGT  | 1 | 1 | 1 | g8921.t1         |
| High | SSGYTDWVVK                | 1 | 1 | 1 | g5121.t1         |
| High | NGEVWTK                   | 1 | 1 | 1 | g3185.t1         |
| High | LSGLSPVR                  | 2 | 1 | 1 | g5915.t1         |
| High | TAFTGSWGRPQR              | 2 | 1 | 1 | g2158.t1         |
| High | LSEALHAR                  | 1 | 1 | 1 | g3279.t1         |
| High | IDDMAVR                   | 1 | 2 | 2 | g377.t1;g6857.t1 |
| High | FIEAIER                   | 1 | 1 | 1 | g7147.t1         |
| High | FASALSNYK                 | 1 | 1 | 1 | g3373.t1         |
| High | HLLVASSR                  | 1 | 1 | 1 | g4461.t1         |
| High | FIIEPYLK                  | 1 | 1 | 1 | g7148.t1         |
| High | DTLFIPPGSR                | 1 | 1 | 1 | g8428.t1         |
| High | TWmPTDPYIYGLGEDVDSFRR     | 1 | 1 | 1 | g9290.t1         |
| High | VYDLLVIK                  | 1 | 1 | 1 | g8672.t1         |
| High | NVcHGSDSVENAKK            | 1 | 1 | 1 | g7496.t1         |
| High | YFVEDSVGR                 | 1 | 1 | 1 | g395.t1          |
| High | TAVYPLQLR                 | 1 | 1 | 1 | g10078.t1        |
| High | NYFLmEDDNLNHPSNFIGNK      | 1 | 1 | 1 | g10078.t1        |
| High | SSFYVVR                   | 1 | 1 | 1 | g4603.t1         |
| High | LLESGHPc                  | 1 | 1 | 1 | g2159.t1         |
| High | DLPLSGSLK                 | 1 | 1 | 1 | g9150.t1         |
| High | SLIDTYR                   | 1 | 1 | 1 | g3185.t1         |
| High | NFITTTK                   | 2 | 1 | 1 | g4076.t1         |
| High | TPFTWGK                   | 2 | 1 | 1 | g377.t1          |
| High | FIIEPYLKDSLSK             | 1 | 1 | 1 | g7148.t1         |
| High | ScFEIGR                   | 1 | 1 | 1 | g216.t1          |
| High | IVLGTGmK                  | 1 | 1 | 1 | g4965.t1         |
| High | IVSLSLTEK                 | 1 | 1 | 1 | g881.t1          |
| High | ImSAFYK                   | 1 | 1 | 1 | g377.t1          |
| High | FNVDTTAFTGSWGRPQR         | 1 | 1 | 1 | g2140.t1         |
| High | LQGSavgagK                | 1 | 1 | 1 | g5712.t1         |
| High | DLGcVHK                   | 1 | 1 | 1 | g2384.t1         |
| High | LFDSIIK                   | 1 | 1 | 1 | g3149.t1         |
| High | TLIQDLR                   | 2 | 1 | 1 | g6658.t1         |
| High | SmDNALGR                  | 1 | 1 | 1 | g3202.t1         |
| High | HESGTSAILR                | 1 | 1 | 1 | g456.t1          |
| High | TFVYEck                   | 1 | 1 | 1 | g6658.t1         |
| High | AAWAPTVAyk                | 1 | 1 | 1 | g6921.t1         |
| High | NLPLQQTlALKIGH            | 1 | 1 | 1 | g377.t1          |
| High | DTImVQNNGHAVIR            | 1 | 1 | 1 | g7482.t1         |
| High | YcIDQGR                   | 1 | 1 | 1 | g4314.t1         |
| High | EIPDFDFDSTK               | 1 | 1 | 1 | g3185.t1         |
| High | FTPEVLLSAPR               | 1 | 1 | 1 | g8539.t1         |
| High | VTFNSEK                   | 1 | 1 | 1 | g2283.t1         |
| High | DVHGFATR                  | 1 | 1 | 1 | g9148.t1         |
| High | GLIDIYK                   | 1 | 1 | 1 | g9337.t1         |
| High | DINIPFSR                  | 1 | 1 | 1 | g7209.t1         |
| High | ELDDmIK                   | 1 | 1 | 1 | g8657.t1         |
| High | ATVPSASIESR               | 1 | 1 | 1 | g3211.t1         |
| High | IMSAFYK                   | 1 | 1 | 1 | g377.t1          |
| High | SGATTPTVDTEEIVWYRPTPK     | 2 | 1 | 1 | g9061.t1         |
| High | VYTDsFR                   | 1 | 1 | 1 | g2140.t1         |
| High | NIYFTVR                   | 1 | 1 | 1 | g6228.t1         |
| High | LSPYSSYFHTGGDEVK          | 1 | 1 | 1 | g2794.t1         |
| High | IFNTFYTSVKPLIAEK          | 1 | 1 | 1 | g8672.t1         |
| High | EVGGIAGEIWPAIKK           | 2 | 1 | 1 | g3307.t1         |
| High | IIYPTNYISLITNEHQK         | 1 | 1 | 1 | g7294.t1         |
| High | ImPYSGGTSR                | 1 | 1 | 1 | g6228.t1         |
| High | NAAGTGTVIETSSATGTPAAGTSAI | 1 | 1 | 1 | g9012.t1         |

|                                 |   |   |             |
|---------------------------------|---|---|-------------|
| High EIPDFDFESTHSAAVSAWTDK      | 1 | 1 | 1 g6145.t1  |
| High SVISESGGGR                 | 1 | 1 | 1 g1569.t1  |
| High FSGLTPmGTSLK               | 1 | 1 | 1 g2149.t1  |
| High AADmILGLQWLVEHDP           | 1 | 1 | 1 g5915.t1  |
| High GVmIDTGR                   | 1 | 1 | 1 g4076.t1  |
| High TSGLLSLLK                  | 1 | 1 | 1 g7301.t1  |
| High cSGYELK                    | 1 | 1 | 1 g9290.t1  |
| High HYPYSR                     | 1 | 1 | 1 g571.t1   |
| High SSIPLDLK                   | 1 | 1 | 1 g5993.t1  |
| High YQVMMQQLQK                 | 1 | 1 | 1 g5754.t1  |
| High SAFRPSDDATIFGYFVPANAMmSV   | 2 | 1 | 1 g6658.t1  |
| High KESSGSIVWESDPNR            | 1 | 1 | 1 g2140.t1  |
| High FKAGTTSVIAR                | 1 | 1 | 1 g3185.t1  |
| High GALVNDTQR                  | 1 | 1 | 1 g4411.t1  |
| High SIPFSAAGQTTFLK             | 1 | 1 | 1 g9163.t1  |
| High TAVNPKGLPQLTSR             | 1 | 1 | 1 g881.t1   |
| High TVSLNPNVR                  | 1 | 1 | 1 g9455.t1  |
| High NPWSLQLQcmNDLPQMPK         | 1 | 1 | 1 g4732.t1  |
| High AQWELLPR                   | 1 | 1 | 1 g7147.t1  |
| High EQIDGmALSK                 | 1 | 1 | 1 g4076.t1  |
| High YSFEEVSK                   | 1 | 1 | 1 g6643.t1  |
| High GSSQTPTVSK                 | 1 | 1 | 1 g5328.t1  |
| High DGLLSLPR                   | 1 | 1 | 1 g8117.t1  |
| High mIAGDATLR                  | 2 | 1 | 1 g2392.t1  |
| High DIPLSSVAK                  | 1 | 1 | 0           |
| High NDEATASGVVGRPTHGR          | 1 | 1 | 1 g3626.t1  |
| High ISLPDFSK                   | 1 | 1 | 1 g4603.t1  |
| High SSHPIEVPVKR                | 1 | 1 | 1 g7301.t1  |
| High SDmVAEQLK                  | 1 | 1 | 1 g3187.t1  |
| High ATAATIDGPAR                | 1 | 1 | 1 g3970.t1  |
| High ASPEDITNLSK                | 1 | 1 | 1 g6643.t1  |
| High VLSIATPGLQR                | 1 | 1 | 1 g3385.t1  |
| High GWDDVTATALR                | 1 | 1 | 1 g4126.t1  |
| High NGEVPSQQLK                 | 1 | 1 | 1 g3954.t1  |
| High EAVGYWVGK                  | 1 | 1 | 1 g4704.t1  |
| High TATTSDKNTALR               | 1 | 1 | 1 g7301.t1  |
| High AQYEYDTDKTmTmLR            | 1 | 1 | 1 g216.t1   |
| High HLTGEFEK                   | 1 | 1 | 1 g3250.t1  |
| High WSTEAIR                    | 1 | 1 | 1 g4550.t1  |
| High GLGFGAEDNVNEYSVPPGc        | 1 | 1 | 1 g571.t1   |
| High TLASVTKR                   | 1 | 1 | 1 g3149.t1  |
| High SLLGDVAVSPAGDI             | 1 | 1 | 1 g5324.t1  |
| High TAVITGGGSLGR               | 1 | 1 | 1 g9459.t1  |
| High FIHDWTPGK                  | 1 | 1 | 1 g1180.t1  |
| High SAAGNFIK                   | 1 | 1 | 1 g10240.t1 |
| High DAGVDPTGAPR                | 1 | 1 | 1 g5613.t1  |
| High VTLELGK                    | 1 | 2 | 1 g5497.t1  |
| High GLNTVFISYAGLTAImFVASLcLYD\ | 1 | 1 | 1 g1073.t1  |
| High DGQAHGVYIASSNGmDIFISK      | 1 | 1 | 1 g9290.t1  |
| High TNEWETVR                   | 1 | 1 | 1 g216.t1   |
| High VPEQPYHK                   | 1 | 2 | 1 g2392.t1  |
| High NIVYPGLEDK                 | 1 | 1 | 1 g5245.t1  |
| High ETDPEEYPR                  | 1 | 1 | 1 g3149.t1  |
| High GSIPVGLVAGPDGNAWVGLLGNST   | 1 | 1 | 1 g3685.t1  |
| High LGTIIVGDPLNRPIIK           | 1 | 1 | 1 g8428.t1  |
| High GmLSFPR                    | 1 | 1 | 1 g8260.t1  |
| High DLEDAVSGYKR                | 1 | 1 | 1 g3728.t1  |
| High RGVAmAEEHRGK               | 1 | 1 | 1 g377.t1   |
| High STFAGDGTR                  | 1 | 1 | 1 g8295.t1  |

|      |                    |   |   |   |          |
|------|--------------------|---|---|---|----------|
| High | FVHQNEVDGK         | 1 | 1 | 1 | g3001.t1 |
| High | TLSDYNIQK          | 1 | 3 | 1 | g1853.t1 |
| High | LDEDVPR            | 1 | 1 | 1 | g4628.t1 |
| High | RDRDPYVGDIAVSGK    | 1 | 1 | 1 | g5548.t1 |
| High | AGDVALATAADSAWSAIK | 1 | 1 | 1 | g5090.t1 |
| High | AGGAQVPAPGR        | 1 | 1 | 1 | g3373.t1 |
| High | RSVTVHAFEQAR       | 1 | 1 | 1 | g6826.t1 |
| High | QTASWTVR           | 1 | 1 | 1 | g9312.t1 |
| High | NIHDFR             | 1 | 1 | 1 | g6228.t1 |
| High | EEILEAcR           | 1 | 1 | 1 | g8452.t1 |



| Modifications                                                        | $\Delta C_n$ | q-Value | PEP     | XCorr | Charge | MH+ [Da] | $\Delta M$ [ppm] |
|----------------------------------------------------------------------|--------------|---------|---------|-------|--------|----------|------------------|
|                                                                      |              |         |         |       |        |          |                  |
|                                                                      | ####         | 0       | 3,7E-09 | 7,95  | 3      | #####    | 5,52             |
|                                                                      | ####         | 0       | 1,6E-10 | 7,89  | 3      | #####    | -0,14            |
|                                                                      | ####         | 0       | 3,3E-10 | 7,87  | 2      | #####    | -0,17            |
|                                                                      | ####         | 0       | 2,8E-10 | 7,85  | 3      | #####    | -0,76            |
| M15(Oxidation); M16(Oxidation); M23(Oxidation); C31(Carbamidomethyl) | ####         | 0       | 1,5E-09 | 7,69  | 3      | #####    | 0,69             |
|                                                                      | ####         | 0       | 4,1E-10 | 7,65  | 3      | #####    | 0,48             |
|                                                                      | ####         | 0       | 1,2E-08 | 7,63  | 3      | #####    | 0,92             |
| M16(Oxidation)                                                       | ####         | 0       | 2E-10   | 7,52  | 3      | #####    | -0,41            |
|                                                                      | ####         | 0       | 1,2E-08 | 7,49  | 3      | #####    | -0,11            |
|                                                                      | ####         | 0       | 8,3E-09 | 7,49  | 3      | #####    | -3,02            |
|                                                                      | ####         | 0       | 3E-10   | 7,48  | 3      | #####    | 0,72             |
| M4(Oxidation); C26(Carbamidomethyl)                                  | ####         | 0       | 3,7E-11 | 7,45  | 3      | #####    | 0,82             |
| C21(Carbamidomethyl); C29(Carbamidomethyl)                           | ####         | 0       | 5,6E-07 | 7,45  | 3      | #####    | 0,13             |
| C20(Carbamidomethyl)                                                 | ####         | 0       | 2,8E-09 | 7,43  | 3      | #####    | 0,37             |
| M24(Oxidation)                                                       | ####         | 0       | 4,3E-11 | 7,30  | 3      | #####    | -0,61            |
|                                                                      | ####         | 0       | 5,9E-12 | 7,25  | 3      | #####    | -2,16            |
|                                                                      | ####         | 0       | 1,8E-09 | 7,22  | 3      | #####    | 1,63             |
| M15(Oxidation)                                                       | ####         | 0       | 9,2E-10 | 7,18  | 3      | #####    | -0,42            |
|                                                                      | ####         | 0       | 1,8E-08 | 7,18  | 3      | #####    | -0,45            |
| M16(Oxidation); M23(Oxidation); C31(Carbamidomethyl)                 | ####         | 0       | 3,8E-07 | 7,17  | 3      | #####    | 0,26             |
| C18(Carbamidomethyl); C26(Carbamidomethyl)                           | ####         | 0       | 5,7E-09 | 7,16  | 3      | #####    | -0,17            |
| C16(Carbamidomethyl)                                                 | ####         | 0       | 1,3E-08 | 7,07  | 3      | #####    | 1,27             |
|                                                                      | ####         | 0       | 5,7E-08 | 7,05  | 3      | #####    | -0,19            |
| M26(Oxidation)                                                       | ####         | 0       | 5,6E-12 | 7,04  | 3      | #####    | -0,44            |
| C11(Carbamidomethyl)                                                 | ####         | 0       | 2,1E-10 | 7,03  | 2      | #####    | 0,08             |
| M19(Oxidation)                                                       | ####         | 0       | 1,9E-05 | 6,98  | 3      | #####    | 3,14             |
| M4(Oxidation)                                                        | ####         | 0       | 1,9E-09 | 6,96  | 2      | #####    | -0,45            |
|                                                                      | ####         | 0       | 1,7E-08 | 6,94  | 3      | #####    | -1,59            |
|                                                                      | ####         | 0       | 4E-08   | 6,92  | 2      | #####    | 1,33             |
|                                                                      | ####         | 0       | 2E-10   | 6,91  | 3      | #####    | -0,67            |
| M28(Oxidation)                                                       | ####         | 0       | 6,8E-08 | 6,90  | 4      | #####    | 4,24             |
| M2(Oxidation); C15(Carbamidomethyl)                                  | ####         | 0       | 4,7E-11 | 6,87  | 2      | #####    | -0,87            |
| M9(Oxidation)                                                        | ####         | 0       | 1,3E-07 | 6,84  | 3      | #####    | -0,29            |
|                                                                      | ####         | 0       | 5,2E-12 | 6,83  | 2      | #####    | 0,98             |
|                                                                      | ####         | 0       | 1,2E-05 | 6,82  | 3      | #####    | 0,10             |
| C26(Carbamidomethyl); C33(Carbamidomethyl)                           | ####         | 0       | 5,4E-07 | 6,81  | 3      | #####    | 1,83             |
|                                                                      | ####         | 0       | 1,5E-08 | 6,79  | 3      | #####    | 0,98             |
|                                                                      | ####         | 0       | 2,5E-07 | 6,73  | 3      | #####    | 1,36             |
|                                                                      | ####         | 0       | 7E-11   | 6,71  | 3      | #####    | -0,75            |
|                                                                      | ####         | 0       | 8,4E-11 | 6,70  | 2      | #####    | 1,61             |
| M26(Oxidation)                                                       | ####         | 0       | 5,5E-07 | 6,70  | 3      | #####    | 1,07             |
|                                                                      | ####         | 0       | 1,4E-07 | 6,67  | 3      | #####    | -1,54            |
| M13(Oxidation)                                                       | ####         | 0       | 6,3E-13 | 6,67  | 3      | #####    | -1,35            |
|                                                                      | ####         | 0       | 1,5E-11 | 6,66  | 2      | #####    | 1,35             |
|                                                                      | ####         | 0       | 5,7E-08 | 6,65  | 3      | #####    | -0,09            |
|                                                                      | ####         | 0       | 5,8E-09 | 6,65  | 2      | #####    | -1,39            |
|                                                                      | ####         | 0       | 3E-09   | 6,62  | 3      | #####    | 0,47             |
|                                                                      | ####         | 0       | 1,1E-08 | 6,61  | 3      | #####    | -1,27            |
| M17(Oxidation)                                                       | ####         | 0       | 3,4E-10 | 6,56  | 3      | #####    | -0,72            |
|                                                                      | ####         | 0       | 5,9E-11 | 6,56  | 3      | #####    | 0,74             |
| C10(Carbamidomethyl)                                                 | ####         | 0       | 1,1E-08 | 6,56  | 3      | #####    | 1,56             |
|                                                                      | ####         | 0       | 2,9E-09 | 6,54  | 3      | #####    | 0,75             |
| M7(Oxidation)                                                        | ####         | 0       | 7,5E-08 | 6,53  | 3      | #####    | 1,42             |
| M2(Oxidation)                                                        | ####         | 0       | 2,6E-08 | 6,52  | 3      | #####    | -0,18            |
|                                                                      | ####         | 0       | 2,8E-08 | 6,49  | 2      | #####    | -1,24            |

|                                                          |      |   |         |      |   |       |       |
|----------------------------------------------------------|------|---|---------|------|---|-------|-------|
|                                                          | #### | 0 | 2,9E-09 | 6,47 | 2 | ##### | -0,42 |
| C2(Carbamidomethyl)                                      | #### | 0 | 3,8E-10 | 6,44 | 3 | ##### | -3,01 |
| M3(Oxidation)                                            | #### | 0 | 1,4E-06 | 6,42 | 3 | ##### | -0,19 |
|                                                          | #### | 0 | 2,7E-08 | 6,42 | 2 | ##### | 1,51  |
|                                                          | #### | 0 | 2,1E-09 | 6,40 | 2 | ##### | 1,31  |
|                                                          | #### | 0 | 5,5E-08 | 6,39 | 3 | ##### | 0,36  |
|                                                          | #### | 0 | 4,4E-08 | 6,39 | 3 | ##### | 1,25  |
| C8(Carbamidomethyl); C14(Carbamidomethyl)                | #### | 0 | 1,5E-07 | 6,39 | 2 | ##### | 1,41  |
| C2(Carbamidomethyl)                                      | #### | 0 | 6,2E-09 | 6,38 | 3 | ##### | 0,41  |
|                                                          | #### | 0 | 1,9E-08 | 6,38 | 3 | ##### | 0,19  |
| C8(Carbamidomethyl); C24(Carbamidomethyl)                | #### | 0 | 1,7E-06 | 6,37 | 3 | ##### | -1,51 |
|                                                          | #### | 0 | 1,6E-07 | 6,37 | 2 | ##### | 0,71  |
|                                                          | #### | 0 | 1,5E-07 | 6,34 | 3 | ##### | -0,04 |
| M2(Oxidation)                                            | #### | 0 | 5,8E-10 | 6,32 | 3 | ##### | -0,47 |
|                                                          | #### | 0 | 1,4E-07 | 6,31 | 3 | ##### | -0,20 |
|                                                          | #### | 0 | 2,5E-09 | 6,31 | 3 | ##### | -0,58 |
|                                                          | #### | 0 | 1E-08   | 6,30 | 3 | ##### | 0,44  |
|                                                          | #### | 0 | 1,6E-09 | 6,30 | 2 | ##### | 0,41  |
|                                                          | #### | 0 | 5,1E-08 | 6,29 | 3 | ##### | 0,12  |
|                                                          | #### | 0 | 2E-08   | 6,29 | 3 | ##### | 0,22  |
| C11(Carbamidomethyl)                                     | #### | 0 | 8,8E-09 | 6,29 | 3 | ##### | -0,51 |
|                                                          | #### | 0 | 2,1E-09 | 6,28 | 3 | ##### | -1,13 |
|                                                          | #### | 0 | 4,3E-07 | 6,28 | 2 | ##### | -0,23 |
| M12(Oxidation)                                           | #### | 0 | 5,4E-09 | 6,28 | 3 | ##### | 0,09  |
| M10(Oxidation)                                           | #### | 0 | 4,2E-07 | 6,27 | 3 | ##### | 0,28  |
| M3(Oxidation)                                            | #### | 0 | 8E-09   | 6,27 | 2 | ##### | -1,01 |
| M3(Oxidation)                                            | #### | 0 | 1E-07   | 6,25 | 2 | ##### | 0,23  |
| M24(Oxidation)                                           | #### | 0 | 9,7E-09 | 6,25 | 3 | ##### | -0,25 |
|                                                          | #### | 0 | 3,2E-07 | 6,25 | 3 | ##### | -0,73 |
|                                                          | #### | 0 | 2,3E-05 | 6,24 | 3 | ##### | -3,64 |
| C19(Carbamidomethyl)                                     | #### | 0 | 8,4E-10 | 6,23 | 2 | ##### | -0,28 |
|                                                          | #### | 0 | 1,7E-06 | 6,22 | 2 | ##### | 1,80  |
|                                                          | #### | 0 | 5,8E-09 | 6,19 | 3 | ##### | 3,59  |
| M27(Oxidation); M31(Oxidation)                           | #### | 0 | 1,1E-08 | 6,18 | 3 | ##### | 0,81  |
|                                                          | #### | 0 | 3,5E-08 | 6,18 | 2 | ##### | -0,36 |
|                                                          | #### | 0 | 9,9E-08 | 6,17 | 3 | ##### | -0,02 |
|                                                          | #### | 0 | 3,7E-08 | 6,16 | 2 | ##### | 0,97  |
|                                                          | #### | 0 | 2,3E-09 | 6,15 | 2 | ##### | 1,68  |
| M5(Oxidation); C6(Carbamidomethyl); C23(Carbamidomethyl) | #### | 0 | 1,9E-07 | 6,15 | 3 | ##### | 0,27  |
|                                                          | #### | 0 | 1,9E-09 | 6,15 | 3 | ##### | -0,93 |
|                                                          | #### | 0 | 1,3E-06 | 6,15 | 2 | ##### | 0,30  |
|                                                          | #### | 0 | 4,9E-09 | 6,13 | 3 | ##### | -2,12 |
|                                                          | #### | 0 | 1E-10   | 6,13 | 3 | ##### | -0,04 |
|                                                          | #### | 0 | 8,2E-06 | 6,12 | 3 | ##### | 0,01  |
|                                                          | #### | 0 | 1,2E-09 | 6,12 | 2 | ##### | -0,91 |
|                                                          | #### | 0 | 1,1E-08 | 6,11 | 2 | ##### | 1,61  |
|                                                          | #### | 0 | 3E-10   | 6,11 | 3 | ##### | 0,03  |
|                                                          | #### | 0 | 8,1E-10 | 6,11 | 2 | ##### | -0,63 |
|                                                          | #### | 0 | 1,8E-06 | 6,10 | 2 | ##### | -1,36 |
|                                                          | #### | 0 | 3,8E-07 | 6,10 | 3 | ##### | -0,51 |
|                                                          | #### | 0 | 5,3E-09 | 6,09 | 2 | ##### | -0,73 |
|                                                          | #### | 0 | 2,3E-07 | 6,08 | 2 | ##### | -2,29 |
|                                                          | #### | 0 | 3,2E-08 | 6,08 | 2 | ##### | -0,09 |
| C10(Carbamidomethyl); C15(Carbamidomethyl)               | #### | 0 | 5,8E-08 | 6,08 | 2 | ##### | 0,79  |
|                                                          | #### | 0 | 1,2E-09 | 6,05 | 2 | ##### | 0,56  |
|                                                          | #### | 0 | 1,3E-08 | 6,04 | 2 | ##### | -0,03 |
|                                                          | #### | 0 | 1,1E-07 | 6,03 | 3 | ##### | -0,77 |
|                                                          | #### | 0 | 5,9E-09 | 6,03 | 2 | ##### | 0,27  |
|                                                          | #### | 0 | 7,7E-11 | 6,03 | 3 | ##### | 0,82  |

|                                            |      |   |         |      |   |       |       |
|--------------------------------------------|------|---|---------|------|---|-------|-------|
|                                            | #### | 0 | 1,8E-06 | 6,03 | 3 | ##### | 0,60  |
| C12(Carbamidomethyl)                       | #### | 0 | 1,6E-09 | 6,02 | 2 | ##### | -0,88 |
| C4(Carbamidomethyl)                        | #### | 0 | 3,7E-08 | 6,02 | 3 | ##### | 0,70  |
| C11(Carbamidomethyl)                       | #### | 0 | 1,1E-07 | 6,01 | 2 | ##### | 4,48  |
|                                            | #### | 0 | 4,1E-09 | 6,00 | 2 | ##### | 0,41  |
|                                            | #### | 0 | 1,3E-06 | 5,98 | 3 | ##### | -1,04 |
| C12(Carbamidomethyl)                       | #### | 0 | 9,8E-05 | 5,98 | 3 | ##### | 1,39  |
| C16(Carbamidomethyl); C21(Carbamidomethyl) | #### | 0 | 1,1E-05 | 5,97 | 3 | ##### | 2,53  |
| C10(Carbamidomethyl)                       | #### | 0 | 3E-08   | 5,97 | 2 | ##### | -0,72 |
|                                            | #### | 0 | 5,9E-09 | 5,96 | 2 | ##### | 2,02  |
|                                            | #### | 0 | 8,9E-09 | 5,95 | 2 | ##### | -0,64 |
|                                            | #### | 0 | 3,9E-06 | 5,95 | 3 | ##### | -0,51 |
| C8(Carbamidomethyl)                        | #### | 0 | 1,8E-07 | 5,92 | 3 | ##### | 1,09  |
|                                            | #### | 0 | 1,2E-06 | 5,91 | 2 | ##### | -0,20 |
|                                            | #### | 0 | 4,3E-09 | 5,91 | 2 | ##### | 0,01  |
|                                            | #### | 0 | 3,1E-10 | 5,90 | 3 | ##### | 0,03  |
|                                            | #### | 0 | 1,4E-06 | 5,90 | 3 | ##### | -1,00 |
|                                            | #### | 0 | 3E-10   | 5,90 | 2 | ##### | -0,01 |
|                                            | #### | 0 | 1,6E-07 | 5,88 | 3 | ##### | -1,35 |
|                                            | #### | 0 | 2,9E-07 | 5,87 | 3 | ##### | 2,16  |
| M7(Oxidation)                              | #### | 0 | 7E-09   | 5,87 | 3 | ##### | 0,41  |
|                                            | #### | 0 | 1,5E-08 | 5,86 | 2 | ##### | 1,47  |
|                                            | #### | 0 | 2,2E-08 | 5,86 | 2 | ##### | 1,38  |
|                                            | #### | 0 | 1,8E-07 | 5,85 | 3 | ##### | -2,93 |
| C18(Carbamidomethyl); C26(Carbamidomethyl) | #### | 0 | 2,9E-05 | 5,83 | 3 | ##### | 1,25  |
|                                            | #### | 0 | 4,5E-10 | 5,83 | 2 | ##### | -0,42 |
|                                            | #### | 0 | 1,9E-07 | 5,83 | 2 | ##### | -0,29 |
|                                            | #### | 0 | 2,6E-08 | 5,82 | 2 | ##### | 0,08  |
|                                            | #### | 0 | 4,7E-08 | 5,82 | 2 | ##### | -1,07 |
|                                            | #### | 0 | 2E-07   | 5,82 | 3 | ##### | -6,95 |
|                                            | #### | 0 | 1,4E-09 | 5,82 | 2 | ##### | 0,17  |
|                                            | #### | 0 | 1,7E-09 | 5,82 | 3 | ##### | -0,62 |
|                                            | #### | 0 | 4,2E-11 | 5,80 | 2 | ##### | -0,19 |
|                                            | #### | 0 | 2E-06   | 5,78 | 3 | ##### | 0,83  |
| C10(Carbamidomethyl); C17(Carbamidomethyl) | #### | 0 | 0,00048 | 5,78 | 3 | ##### | -5,10 |
| M16(Oxidation)                             | #### | 0 | 4,2E-07 | 5,78 | 3 | ##### | -0,64 |
|                                            | #### | 0 | 2,3E-09 | 5,78 | 2 | ##### | 0,47  |
| M7(Oxidation)                              | #### | 0 | 1,8E-08 | 5,77 | 2 | ##### | -0,82 |
| M7(Oxidation)                              | #### | 0 | 7E-08   | 5,76 | 2 | ##### | -0,04 |
| M12(Oxidation)                             | #### | 0 | 1,3E-08 | 5,76 | 3 | ##### | -0,07 |
| C26(Carbamidomethyl)                       | #### | 0 | 2,5E-09 | 5,76 | 3 | ##### | 0,29  |
|                                            | #### | 0 | 5,5E-07 | 5,76 | 2 | ##### | 1,04  |
|                                            | #### | 0 | 9,7E-10 | 5,74 | 2 | ##### | -1,57 |
|                                            | #### | 0 | 3,1E-09 | 5,73 | 2 | ##### | 0,33  |
|                                            | #### | 0 | 4,7E-08 | 5,73 | 2 | ##### | -0,04 |
| C12(Carbamidomethyl)                       | #### | 0 | 9E-09   | 5,73 | 3 | ##### | -0,72 |
|                                            | #### | 0 | 0,00081 | 5,72 | 3 | ##### | -2,14 |
|                                            | #### | 0 | 9,9E-07 | 5,70 | 3 | ##### | -0,20 |
|                                            | #### | 0 | 1,3E-05 | 5,70 | 3 | ##### | -0,78 |
|                                            | #### | 0 | 1,1E-07 | 5,69 | 2 | ##### | -0,50 |
|                                            | #### | 0 | 5,6E-07 | 5,68 | 3 | ##### | -2,88 |
|                                            | #### | 0 | 4,6E-08 | 5,68 | 2 | ##### | 0,03  |
|                                            | #### | 0 | 4,5E-09 | 5,68 | 2 | ##### | -1,79 |
| M21(Oxidation)                             | #### | 0 | 5,7E-06 | 5,68 | 3 | ##### | -0,41 |
|                                            | #### | 0 | 2,9E-07 | 5,67 | 3 | ##### | 0,91  |
| C8(Carbamidomethyl)                        | #### | 0 | 1,5E-07 | 5,67 | 2 | ##### | 0,64  |
| C8(Carbamidomethyl)                        | #### | 0 | 1,4E-08 | 5,67 | 2 | ##### | 0,15  |
| C3(Carbamidomethyl); C9(Carbamidomethyl)   | #### | 0 | 4,8E-05 | 5,66 | 3 | ##### | 0,25  |
|                                            | #### | 0 | 3,3E-10 | 5,65 | 2 | ##### | 0,68  |

|                                                                   |      |   |         |      |   |       |       |
|-------------------------------------------------------------------|------|---|---------|------|---|-------|-------|
|                                                                   | #### | 0 | 1,3E-06 | 5,63 | 2 | ##### | 6,82  |
|                                                                   | #### | 0 | 1,7E-07 | 5,63 | 2 | ##### | -1,06 |
| C11(Carbamidomethyl)                                              | #### | 0 | 1,7E-06 | 5,62 | 2 | ##### | 1,15  |
| C2(Carbamidomethyl); M27(Oxidation)                               | #### | 0 | 0,00019 | 5,62 | 3 | ##### | -0,98 |
|                                                                   | #### | 0 | 4E-08   | 5,62 | 3 | ##### | 0,30  |
| M8(Oxidation)                                                     | #### | 0 | 4E-07   | 5,61 | 3 | ##### | -0,37 |
|                                                                   | #### | 0 | 4,1E-05 | 5,60 | 3 | ##### | -1,19 |
|                                                                   | #### | 0 | 1,3E-07 | 5,60 | 2 | ##### | 0,31  |
| M3(Oxidation)                                                     | #### | 0 | 4,9E-06 | 5,60 | 3 | ##### | -1,83 |
| C9(Carbamidomethyl)                                               | #### | 0 | 2,2E-09 | 5,59 | 2 | ##### | -0,21 |
|                                                                   | #### | 0 | 2,4E-09 | 5,59 | 2 | ##### | -0,19 |
|                                                                   | #### | 0 | 2,1E-08 | 5,59 | 2 | ##### | 1,70  |
|                                                                   | #### | 0 | 9,5E-08 | 5,59 | 3 | ##### | 0,27  |
|                                                                   | #### | 0 | 2,6E-07 | 5,59 | 2 | ##### | -0,42 |
|                                                                   | #### | 0 | 1,7E-07 | 5,58 | 3 | ##### | -3,21 |
|                                                                   | #### | 0 | 1,5E-08 | 5,58 | 3 | ##### | -0,58 |
| C1(Carbamidomethyl); M4(Oxidation); C8(Carbamidomethyl); C17(Carb | #### | 0 | 2,4E-05 | 5,57 | 3 | ##### | -2,04 |
|                                                                   | #### | 0 | 3,9E-07 | 5,56 | 2 | ##### | -0,55 |
|                                                                   | #### | 0 | 7,9E-08 | 5,55 | 3 | ##### | 0,53  |
|                                                                   | #### | 0 | 7,5E-07 | 5,54 | 3 | ##### | -0,55 |
|                                                                   | #### | 0 | 1,4E-07 | 5,54 | 2 | ##### | 0,44  |
|                                                                   | #### | 0 | 1,6E-07 | 5,52 | 2 | ##### | -1,49 |
|                                                                   | #### | 0 | 1,9E-06 | 5,51 | 2 | ##### | 3,18  |
| M2(Oxidation)                                                     | #### | 0 | 1,2E-08 | 5,51 | 2 | ##### | -0,32 |
| C12(Carbamidomethyl)                                              | #### | 0 | 2,3E-06 | 5,50 | 2 | ##### | 2,45  |
| C22(Carbamidomethyl); C30(Carbamidomethyl)                        | #### | 0 | 8,1E-07 | 5,50 | 4 | ##### | 0,48  |
|                                                                   | #### | 0 | 8,8E-08 | 5,49 | 2 | ##### | 1,09  |
| M21(Oxidation); M22(Oxidation)                                    | #### | 0 | 2,5E-05 | 5,47 | 3 | ##### | 0,57  |
|                                                                   | #### | 0 | 2,4E-06 | 5,47 | 2 | ##### | -0,13 |
|                                                                   | #### | 0 | 8E-06   | 5,46 | 2 | ##### | -3,05 |
|                                                                   | #### | 0 | 2,4E-07 | 5,45 | 3 | ##### | -1,47 |
|                                                                   | #### | 0 | 2,7E-06 | 5,44 | 3 | ##### | 0,82  |
|                                                                   | #### | 0 | 2,8E-05 | 5,43 | 3 | ##### | 4,20  |
|                                                                   | #### | 0 | 0,00043 | 5,43 | 3 | ##### | -5,06 |
|                                                                   | #### | 0 | 2,8E-08 | 5,43 | 3 | ##### | 0,18  |
|                                                                   | #### | 0 | 1,4E-07 | 5,42 | 2 | ##### | -0,08 |
|                                                                   | #### | 0 | 3,6E-05 | 5,42 | 3 | ##### | -0,60 |
| C17(Carbamidomethyl)                                              | #### | 0 | 4,2E-07 | 5,41 | 3 | ##### | 0,37  |
| M3(Oxidation)                                                     | #### | 0 | 1,3E-05 | 5,41 | 3 | ##### | 1,38  |
| M14(Oxidation)                                                    | #### | 0 | 4E-07   | 5,39 | 3 | ##### | -0,41 |
| C5(Carbamidomethyl)                                               | #### | 0 | 3,5E-09 | 5,39 | 2 | ##### | -0,15 |
| C12(Carbamidomethyl)                                              | #### | 0 | 1,5E-06 | 5,38 | 3 | ##### | 1,43  |
|                                                                   | #### | 0 | 1,9E-08 | 5,38 | 3 | ##### | 0,56  |
|                                                                   | #### | 0 | 0,0011  | 5,36 | 2 | ##### | 0,83  |
|                                                                   | #### | 0 | 1,7E-08 | 5,36 | 3 | ##### | 0,38  |
|                                                                   | #### | 0 | 5,5E-05 | 5,36 | 2 | ##### | -0,40 |
|                                                                   | #### | 0 | 1,2E-07 | 5,35 | 2 | ##### | 1,46  |
|                                                                   | #### | 0 | 1,3E-07 | 5,35 | 2 | ##### | -1,64 |
| C22(Carbamidomethyl)                                              | #### | 0 | 8,4E-08 | 5,33 | 3 | ##### | -0,46 |
| C8(Carbamidomethyl)                                               | #### | 0 | 3,8E-06 | 5,33 | 2 | ##### | 0,54  |
| C5(Carbamidomethyl); C10(Carbamidomethyl)                         | #### | 0 | 2,2E-08 | 5,33 | 2 | ##### | 1,19  |
| C9(Carbamidomethyl)                                               | #### | 0 | 2,9E-06 | 5,33 | 3 | ##### | 0,58  |
|                                                                   | #### | 0 | 5,5E-08 | 5,32 | 2 | ##### | 1,74  |
|                                                                   | #### | 0 | 1,4E-08 | 5,32 | 2 | ##### | -1,40 |
|                                                                   | #### | 0 | 3,6E-08 | 5,31 | 2 | ##### | -0,23 |
|                                                                   | #### | 0 | 3,4E-08 | 5,31 | 2 | ##### | -0,61 |
|                                                                   | #### | 0 | 1,3E-06 | 5,31 | 2 | ##### | -0,28 |
| C3(Carbamidomethyl)                                               | #### | 0 | 2,9E-09 | 5,31 | 2 | ##### | -0,13 |
| M7(Oxidation)                                                     | #### | 0 | 1,8E-07 | 5,30 | 2 | ##### | -2,95 |

|                                           |      |   |         |      |   |       |       |
|-------------------------------------------|------|---|---------|------|---|-------|-------|
|                                           | #### | 0 | 7E-08   | 5,30 | 3 | ##### | -1,62 |
| C9(Carbamidomethyl); C15(Carbamidomethyl) | #### | 0 | 0,00022 | 5,30 | 3 | ##### | -3,21 |
|                                           | #### | 0 | 2,4E-09 | 5,30 | 2 | ##### | -1,22 |
|                                           | #### | 0 | 0,00011 | 5,29 | 3 | ##### | -0,75 |
| M13(Oxidation)                            | #### | 0 | 2,3E-05 | 5,28 | 3 | ##### | -0,43 |
| M3(Oxidation)                             | #### | 0 | 3,1E-06 | 5,28 | 2 | ##### | -0,70 |
|                                           | #### | 0 | 6,1E-07 | 5,28 | 2 | ##### | -1,69 |
|                                           | #### | 0 | 6,8E-06 | 5,28 | 2 | ##### | -1,33 |
|                                           | #### | 0 | 2,5E-06 | 5,27 | 2 | ##### | 0,41  |
| C18(Carbamidomethyl)                      | #### | 0 | 3,1E-08 | 5,27 | 3 | ##### | -1,76 |
| C25(Carbamidomethyl)                      | #### | 0 | 2,8E-06 | 5,26 | 3 | ##### | 0,60  |
|                                           | #### | 0 | 1,1E-06 | 5,25 | 2 | ##### | -0,69 |
| C12(Carbamidomethyl)                      | #### | 0 | 7,2E-06 | 5,25 | 2 | ##### | 0,48  |
| M10(Oxidation)                            | #### | 0 | 7,3E-05 | 5,25 | 3 | ##### | -1,21 |
|                                           | #### | 0 | 5,5E-07 | 5,25 | 3 | ##### | 0,43  |
|                                           | #### | 0 | 8,4E-06 | 5,24 | 3 | ##### | -1,27 |
| M18(Oxidation); M22(Oxidation)            | #### | 0 | 4,5E-05 | 5,23 | 3 | ##### | 1,07  |
|                                           | #### | 0 | 7,1E-07 | 5,23 | 2 | ##### | -1,44 |
| C18(Carbamidomethyl)                      | #### | 0 | 2,2E-05 | 5,23 | 3 | ##### | -4,56 |
|                                           | #### | 0 | 5,4E-08 | 5,22 | 3 | ##### | -0,50 |
|                                           | #### | 0 | 9,7E-08 | 5,22 | 3 | ##### | 0,06  |
|                                           | #### | 0 | 0,00058 | 5,22 | 2 | ##### | -2,73 |
|                                           | #### | 0 | 1,1E-07 | 5,21 | 2 | ##### | 0,12  |
| C14(Carbamidomethyl)                      | #### | 0 | 1,7E-07 | 5,21 | 2 | ##### | -0,14 |
|                                           | #### | 0 | 2,2E-06 | 5,21 | 3 | ##### | 0,82  |
|                                           | #### | 0 | 4,7E-09 | 5,21 | 2 | ##### | -0,20 |
|                                           | #### | 0 | 3,3E-06 | 5,21 | 2 | ##### | -2,04 |
| C17(Carbamidomethyl)                      | #### | 0 | 1,6E-05 | 5,21 | 3 | ##### | -0,90 |
| C8(Carbamidomethyl)                       | #### | 0 | 1,4E-07 | 5,20 | 2 | ##### | -0,62 |
| C13(Carbamidomethyl)                      | #### | 0 | 3,2E-08 | 5,20 | 2 | ##### | -0,88 |
|                                           | #### | 0 | 1E-06   | 5,20 | 2 | ##### | -0,75 |
| M5(Oxidation)                             | #### | 0 | 5,8E-05 | 5,19 | 3 | ##### | -0,75 |
| C13(Carbamidomethyl)                      | #### | 0 | 2,8E-05 | 5,19 | 3 | ##### | 1,57  |
|                                           | #### | 0 | 1,8E-07 | 5,19 | 3 | ##### | 5,19  |
|                                           | #### | 0 | 1,1E-08 | 5,19 | 3 | ##### | 0,14  |
|                                           | #### | 0 | 1,1E-05 | 5,18 | 3 | ##### | -1,04 |
|                                           | #### | 0 | 2E-08   | 5,18 | 2 | ##### | 0,02  |
|                                           | #### | 0 | 2,4E-08 | 5,18 | 2 | ##### | -0,35 |
| C5(Carbamidomethyl)                       | #### | 0 | 2,3E-06 | 5,17 | 2 | ##### | -1,70 |
|                                           | #### | 0 | 1,3E-07 | 5,17 | 3 | ##### | 1,07  |
| C13(Carbamidomethyl)                      | #### | 0 | 3,4E-05 | 5,15 | 3 | ##### | 0,80  |
|                                           | #### | 0 | 1,9E-07 | 5,15 | 2 | ##### | -0,39 |
| C9(Carbamidomethyl)                       | #### | 0 | 1,3E-07 | 5,15 | 2 | ##### | -0,27 |
|                                           | #### | 0 | 2,4E-06 | 5,14 | 3 | ##### | 0,12  |
|                                           | #### | 0 | 9,6E-05 | 5,14 | 3 | ##### | -4,86 |
|                                           | #### | 0 | 1,2E-05 | 5,14 | 2 | ##### | -2,23 |
|                                           | #### | 0 | 4,6E-09 | 5,13 | 2 | ##### | -0,16 |
|                                           | #### | 0 | 1,1E-05 | 5,13 | 2 | ##### | 0,40  |
| M13(Oxidation)                            | #### | 0 | 2,7E-05 | 5,12 | 3 | ##### | 1,46  |
| C7(Carbamidomethyl)                       | #### | 0 | 4,3E-06 | 5,12 | 3 | ##### | -1,03 |
|                                           | #### | 0 | 6,1E-07 | 5,12 | 2 | ##### | -0,63 |
|                                           | #### | 0 | 5,3E-07 | 5,12 | 2 | ##### | -0,52 |
| M14(Oxidation)                            | #### | 0 | 1,7E-05 | 5,10 | 3 | ##### | 1,91  |
|                                           | #### | 0 | 6,9E-08 | 5,10 | 2 | ##### | 0,34  |
|                                           | #### | 0 | 3,7E-05 | 5,09 | 2 | ##### | 3,54  |
|                                           | #### | 0 | 1,2E-07 | 5,08 | 3 | ##### | -1,05 |
|                                           | #### | 0 | 2,4E-06 | 5,08 | 2 | ##### | -0,65 |
|                                           | #### | 0 | 1,1E-06 | 5,08 | 3 | ##### | -0,80 |
|                                           | #### | 0 | 1,6E-06 | 5,08 | 3 | ##### | -0,70 |

|                                                   |      |   |         |      |   |       |       |
|---------------------------------------------------|------|---|---------|------|---|-------|-------|
| C14(Carbamidomethyl)                              | #### | 0 | 8,8E-06 | 5,07 | 2 | ##### | 0,25  |
| M1(Oxidation); M7(Oxidation)                      | #### | 0 | 0,00066 | 5,07 | 3 | ##### | -2,27 |
|                                                   | #### | 0 | 3,1E-09 | 5,07 | 4 | ##### | -0,17 |
|                                                   | #### | 0 | 4,1E-06 | 5,06 | 2 | ##### | -0,18 |
|                                                   | #### | 0 | 1,6E-07 | 5,06 | 2 | ##### | 1,00  |
| C8(Carbamidomethyl)                               | #### | 0 | 1,4E-08 | 5,05 | 2 | ##### | 1,32  |
|                                                   | #### | 0 | 1,6E-06 | 5,05 | 2 | ##### | 2,24  |
|                                                   | #### | 0 | 1,7E-07 | 5,03 | 2 | ##### | -0,98 |
|                                                   | #### | 0 | 1E-05   | 5,03 | 3 | ##### | -0,92 |
|                                                   | #### | 0 | 1,9E-06 | 5,03 | 3 | ##### | -0,09 |
|                                                   | #### | 0 | 1,5E-07 | 5,02 | 2 | ##### | 0,02  |
|                                                   | #### | 0 | 8,6E-06 | 5,02 | 3 | ##### | 3,94  |
|                                                   | #### | 0 | 1,4E-05 | 5,02 | 4 | ##### | -0,98 |
|                                                   | #### | 0 | 3,6E-07 | 5,00 | 2 | ##### | -0,27 |
|                                                   | #### | 0 | 6,4E-06 | 5,00 | 3 | ##### | -0,01 |
| C9(Carbamidomethyl); M11(Oxidation)               | #### | 0 | 2,8E-05 | 4,99 | 3 | ##### | -1,12 |
| C22(Carbamidomethyl)                              | #### | 0 | 7,3E-08 | 4,99 | 3 | ##### | 0,39  |
|                                                   | #### | 0 | 6,6E-06 | 4,97 | 3 | ##### | -1,69 |
|                                                   | #### | 0 | 1E-07   | 4,97 | 2 | ##### | -0,28 |
| M16(Oxidation)                                    | #### | 0 | 4,5E-08 | 4,97 | 2 | ##### | 0,63  |
|                                                   | #### | 0 | 1,7E-07 | 4,96 | 2 | ##### | -2,07 |
|                                                   | #### | 0 | 5,3E-09 | 4,96 | 2 | ##### | 2,16  |
| C9(Carbamidomethyl)                               | #### | 0 | 9,6E-08 | 4,95 | 3 | ##### | 1,03  |
|                                                   | #### | 0 | 6,9E-07 | 4,94 | 3 | ##### | -6,05 |
|                                                   | #### | 0 | 1,6E-07 | 4,93 | 3 | ##### | -1,13 |
|                                                   | #### | 0 | 3,5E-06 | 4,93 | 2 | ##### | -0,60 |
| M5(Oxidation)                                     | #### | 0 | 0,00038 | 4,92 | 3 | ##### | -1,68 |
| M4(Oxidation)                                     | #### | 0 | 1,7E-07 | 4,92 | 2 | ##### | 0,18  |
|                                                   | #### | 0 | 1,6E-06 | 4,92 | 3 | ##### | -0,28 |
|                                                   | #### | 0 | 2,4E-07 | 4,92 | 2 | ##### | -2,17 |
| M3(Oxidation)                                     | #### | 0 | 8E-05   | 4,92 | 2 | ##### | 0,51  |
| M3(Oxidation); M7(Oxidation); C9(Carbamidomethyl) | #### | 0 | 1,3E-08 | 4,92 | 3 | ##### | 0,37  |
|                                                   | #### | 0 | 1,9E-06 | 4,91 | 2 | ##### | -0,72 |
|                                                   | #### | 0 | 8,6E-07 | 4,91 | 2 | ##### | -3,53 |
|                                                   | #### | 0 | 2,1E-06 | 4,91 | 2 | ##### | -0,79 |
|                                                   | #### | 0 | 2,4E-08 | 4,90 | 2 | ##### | 1,61  |
| M16(Oxidation)                                    | #### | 0 | 5,6E-07 | 4,89 | 2 | ##### | 0,72  |
| M7(Oxidation)                                     | #### | 0 | 0,0001  | 4,88 | 2 | ##### | -0,25 |
|                                                   | #### | 0 | 2,4E-06 | 4,88 | 2 | ##### | 0,53  |
|                                                   | #### | 0 | 2,6E-07 | 4,88 | 3 | ##### | 0,30  |
| M19(Oxidation); C29(Carbamidomethyl)              | #### | 0 | 4,4E-05 | 4,87 | 4 | ##### | 1,05  |
|                                                   | #### | 0 | 1,5E-06 | 4,87 | 2 | ##### | 0,14  |
|                                                   | #### | 0 | 0,00027 | 4,86 | 3 | ##### | -1,12 |
|                                                   | #### | 0 | 7,6E-05 | 4,86 | 3 | ##### | -0,05 |
|                                                   | #### | 0 | 1,1E-05 | 4,85 | 3 | ##### | 0,14  |
|                                                   | #### | 0 | 0,00033 | 4,85 | 3 | ##### | 0,11  |
|                                                   | #### | 0 | 4,5E-08 | 4,84 | 3 | ##### | 0,89  |
|                                                   | #### | 0 | 0,00036 | 4,84 | 2 | ##### | -1,04 |
|                                                   | #### | 0 | 8,5E-06 | 4,83 | 2 | ##### | -0,76 |
|                                                   | #### | 0 | 6,2E-06 | 4,83 | 2 | ##### | 0,50  |
|                                                   | #### | 0 | 2,6E-08 | 4,83 | 2 | ##### | -0,25 |
|                                                   | #### | 0 | 1,8E-08 | 4,81 | 3 | ##### | -0,05 |
|                                                   | #### | 0 | 3,3E-05 | 4,81 | 3 | ##### | 2,66  |
|                                                   | #### | 0 | 1E-05   | 4,81 | 2 | ##### | -0,70 |
|                                                   | #### | 0 | 0,00014 | 4,81 | 3 | ##### | -0,79 |
| C8(Carbamidomethyl)                               | #### | 0 | 1,1E-07 | 4,80 | 2 | ##### | -2,18 |
|                                                   | #### | 0 | 2,7E-07 | 4,80 | 2 | ##### | -0,46 |
|                                                   | #### | 0 | 7,5E-08 | 4,80 | 2 | ##### | -2,21 |
|                                                   | #### | 0 | 0,00029 | 4,79 | 3 | ##### | 0,01  |

|                                            |      |   |         |      |   |       |       |
|--------------------------------------------|------|---|---------|------|---|-------|-------|
|                                            | #### | 0 | 1,2E-05 | 4,78 | 2 | ##### | 0,33  |
| M3(Oxidation); C16(Carbamidomethyl)        | #### | 0 | 4,9E-07 | 4,78 | 3 | ##### | 0,36  |
| C8(Carbamidomethyl); C14(Carbamidomethyl)  | #### | 0 | 1,7E-07 | 4,78 | 2 | ##### | -0,07 |
|                                            | #### | 0 | 3,4E-06 | 4,77 | 2 | ##### | 0,07  |
|                                            | #### | 0 | 2,1E-06 | 4,76 | 2 | ##### | -0,13 |
|                                            | #### | 0 | 1,3E-05 | 4,76 | 3 | ##### | -1,57 |
|                                            | #### | 0 | 5,5E-07 | 4,76 | 2 | ##### | -0,58 |
|                                            | #### | 0 | 7,1E-09 | 4,75 | 3 | ##### | -0,81 |
|                                            | #### | 0 | 1,4E-06 | 4,75 | 3 | ##### | -0,46 |
|                                            | #### | 0 | 4,1E-07 | 4,74 | 2 | ##### | 0,99  |
| M4(Oxidation)                              | #### | 0 | 2,1E-08 | 4,74 | 3 | ##### | -0,23 |
|                                            | #### | 0 | 6,4E-06 | 4,74 | 2 | ##### | -0,92 |
|                                            | #### | 0 | 5,6E-05 | 4,73 | 2 | ##### | 0,46  |
|                                            | #### | 0 | 2,6E-06 | 4,73 | 3 | ##### | -0,15 |
| C10(Carbamidomethyl); C14(Carbamidomethyl) | #### | 0 | 5,6E-07 | 4,73 | 2 | ##### | -0,09 |
|                                            | #### | 0 | 0,00041 | 4,73 | 3 | ##### | -0,15 |
| C2(Carbamidomethyl)                        | #### | 0 | 4,4E-08 | 4,72 | 2 | ##### | 1,15  |
|                                            | #### | 0 | 1,8E-06 | 4,72 | 2 | ##### | -0,39 |
| M10(Oxidation)                             | #### | 0 | 9,5E-07 | 4,72 | 2 | ##### | -2,05 |
|                                            | #### | 0 | 8,1E-08 | 4,71 | 2 | ##### | 0,97  |
| C6(Carbamidomethyl); C13(Carbamidomethyl)  | #### | 0 | 1,3E-06 | 4,70 | 2 | ##### | -1,02 |
|                                            | #### | 0 | 7,4E-07 | 4,70 | 3 | ##### | 0,19  |
|                                            | #### | 0 | 7,5E-06 | 4,70 | 3 | ##### | -0,57 |
|                                            | #### | 0 | 1,4E-05 | 4,69 | 2 | ##### | -1,12 |
|                                            | #### | 0 | 6,5E-07 | 4,69 | 2 | ##### | -0,04 |
| C29(Carbamidomethyl)                       | #### | 0 | 4,5E-05 | 4,69 | 4 | ##### | 0,79  |
| M6(Oxidation)                              | #### | 0 | 8,8E-07 | 4,68 | 2 | ##### | -0,39 |
|                                            | #### | 0 | 6,3E-05 | 4,67 | 2 | ##### | -1,29 |
|                                            | #### | 0 | 1,8E-07 | 4,67 | 2 | ##### | -0,34 |
| C7(Carbamidomethyl)                        | #### | 0 | 1,3E-06 | 4,66 | 2 | ##### | 0,78  |
|                                            | #### | 0 | 8,6E-05 | 4,66 | 2 | ##### | -1,88 |
|                                            | #### | 0 | 3,8E-05 | 4,65 | 2 | ##### | -0,20 |
| M3(Oxidation)                              | #### | 0 | 5,8E-06 | 4,65 | 3 | ##### | 1,04  |
|                                            | #### | 0 | 0,00078 | 4,65 | 2 | ##### | -0,94 |
| M7(Oxidation)                              | #### | 0 | 1,2E-06 | 4,65 | 3 | ##### | -0,29 |
|                                            | #### | 0 | 1,6E-06 | 4,64 | 3 | ##### | -0,18 |
|                                            | #### | 0 | 3,2E-06 | 4,64 | 2 | ##### | -0,57 |
|                                            | #### | 0 | 1,9E-07 | 4,63 | 2 | ##### | -1,33 |
|                                            | #### | 0 | 2,5E-06 | 4,63 | 2 | ##### | -1,33 |
| M12(Oxidation); M14(Oxidation)             | #### | 0 | 7,9E-08 | 4,63 | 2 | ##### | -0,91 |
|                                            | #### | 0 | 1,1E-05 | 4,62 | 2 | ##### | 1,60  |
|                                            | #### | 0 | 1,4E-05 | 4,62 | 2 | ##### | 0,25  |
|                                            | #### | 0 | 4,5E-07 | 4,62 | 3 | ##### | -1,38 |
|                                            | #### | 0 | 0,00085 | 4,60 | 3 | ##### | -0,75 |
|                                            | #### | 0 | 1,7E-05 | 4,60 | 2 | ##### | -2,94 |
|                                            | #### | 0 | 5,4E-05 | 4,60 | 2 | ##### | -0,09 |
|                                            | #### | 0 | 0,00017 | 4,60 | 2 | ##### | -1,41 |
|                                            | #### | 0 | 2E-07   | 4,59 | 2 | ##### | 0,11  |
|                                            | #### | 0 | 1,8E-07 | 4,59 | 2 | ##### | -0,24 |
|                                            | #### | 0 | 0,00079 | 4,59 | 3 | ##### | 3,16  |
| C1(Carbamidomethyl)                        | #### | 0 | 3,8E-05 | 4,58 | 3 | ##### | 0,54  |
|                                            | #### | 0 | 0,0008  | 4,58 | 3 | ##### | 3,18  |
|                                            | #### | 0 | 4,4E-07 | 4,57 | 2 | ##### | -1,87 |
|                                            | #### | 0 | 2,4E-06 | 4,57 | 3 | ##### | 1,79  |
| M6(Oxidation)                              | #### | 0 | 2E-05   | 4,57 | 2 | ##### | -0,55 |
|                                            | #### | 0 | 1,6E-07 | 4,56 | 3 | ##### | -0,14 |
| M18(Oxidation)                             | #### | 0 | 1E-06   | 4,56 | 2 | ##### | -0,21 |
|                                            | #### | 0 | 1,1E-07 | 4,56 | 2 | ##### | -0,85 |
|                                            | #### | 0 | 0,00011 | 4,55 | 2 | ##### | 2,04  |

|                                                           |      |   |         |      |   |       |       |
|-----------------------------------------------------------|------|---|---------|------|---|-------|-------|
|                                                           | #### | 0 | 4,6E-06 | 4,55 | 3 | ##### | -0,51 |
|                                                           | #### | 0 | 5,9E-07 | 4,54 | 2 | ##### | -0,52 |
| M7(Oxidation)                                             | #### | 0 | 0,00011 | 4,54 | 3 | ##### | -0,73 |
|                                                           | #### | 0 | 7E-06   | 4,53 | 3 | ##### | 0,13  |
| M2(Oxidation); M7(Oxidation)                              | #### | 0 | 9,4E-06 | 4,53 | 2 | ##### | -0,67 |
|                                                           | #### | 0 | 6,5E-07 | 4,53 | 2 | ##### | -0,19 |
| M11(Oxidation)                                            | #### | 0 | 1,8E-06 | 4,53 | 2 | ##### | -0,32 |
| C4(Carbamidomethyl); C18(Carbamidomethyl)                 | #### | 0 | 5,6E-05 | 4,52 | 3 | ##### | -0,28 |
|                                                           | #### | 0 | 0,00011 | 4,52 | 3 | ##### | 1,62  |
| M1(Oxidation); M7(Oxidation)                              | #### | 0 | 5,4E-05 | 4,52 | 3 | ##### | -0,18 |
|                                                           | #### | 0 | 5,9E-05 | 4,52 | 3 | ##### | 0,57  |
|                                                           | #### | 0 | 8,2E-05 | 4,51 | 3 | ##### | -0,33 |
|                                                           | #### | 0 | 4,2E-05 | 4,51 | 3 | ##### | 1,33  |
|                                                           | #### | 0 | 4,5E-06 | 4,51 | 3 | ##### | -0,02 |
|                                                           | #### | 0 | 3,7E-05 | 4,50 | 3 | ##### | 2,06  |
|                                                           | #### | 0 | 2,3E-06 | 4,50 | 3 | ##### | 3,13  |
|                                                           | #### | 0 | 9,2E-05 | 4,49 | 2 | ##### | -0,45 |
| M15(Oxidation)                                            | #### | 0 | 3,9E-07 | 4,49 | 2 | ##### | 2,48  |
|                                                           | #### | 0 | 1,8E-05 | 4,49 | 2 | ##### | -0,74 |
|                                                           | #### | 0 | 0,00062 | 4,49 | 3 | ##### | -2,22 |
|                                                           | #### | 0 | 7,4E-06 | 4,48 | 2 | ##### | -0,49 |
|                                                           | #### | 0 | 7,9E-06 | 4,46 | 2 | ##### | -0,72 |
|                                                           | #### | 0 | 0,00052 | 4,46 | 3 | ##### | -0,26 |
|                                                           | #### | 0 | 5,7E-06 | 4,46 | 2 | ##### | 1,94  |
|                                                           | #### | 0 | 4,6E-05 | 4,45 | 3 | ##### | -4,24 |
| C2(Carbamidomethyl); C11(Carbamidomethyl); M16(Oxidation) | #### | 0 | 4E-06   | 4,45 | 3 | ##### | 0,52  |
|                                                           | #### | 0 | 7,4E-07 | 4,45 | 3 | ##### | 0,32  |
|                                                           | #### | 0 | 1,6E-05 | 4,45 | 2 | ##### | -1,21 |
|                                                           | #### | 0 | 6E-06   | 4,45 | 2 | ##### | 0,03  |
|                                                           | #### | 0 | 2,1E-05 | 4,44 | 2 | ##### | -0,16 |
|                                                           | #### | 0 | 0,00077 | 4,44 | 2 | ##### | 2,10  |
|                                                           | #### | 0 | 2,2E-05 | 4,43 | 2 | ##### | -0,41 |
|                                                           | #### | 0 | 5,2E-06 | 4,42 | 4 | ##### | -0,67 |
|                                                           | #### | 0 | 6,3E-05 | 4,42 | 2 | ##### | 0,00  |
|                                                           | #### | 0 | 1E-06   | 4,39 | 2 | ##### | 0,96  |
| M5(Oxidation); M8(Oxidation)                              | #### | 0 | 1,9E-06 | 4,39 | 3 | ##### | -0,92 |
|                                                           | #### | 0 | 0,00014 | 4,39 | 2 | ##### | -0,60 |
|                                                           | #### | 0 | 0,00026 | 4,38 | 2 | ##### | -1,46 |
|                                                           | #### | 0 | 3,5E-06 | 4,38 | 2 | ##### | -0,81 |
|                                                           | #### | 0 | 8,9E-07 | 4,38 | 2 | ##### | -0,54 |
|                                                           | #### | 0 | 8,8E-06 | 4,36 | 3 | ##### | 0,87  |
|                                                           | #### | 0 | 4,6E-05 | 4,35 | 2 | ##### | -0,23 |
|                                                           | #### | 0 | 0,0001  | 4,35 | 3 | ##### | -1,37 |
|                                                           | #### | 0 | 6,4E-07 | 4,35 | 2 | ##### | -0,40 |
| M3(Oxidation)                                             | #### | 0 | 6,3E-05 | 4,34 | 2 | ##### | -0,04 |
| C4(Carbamidomethyl)                                       | #### | 0 | 1,2E-05 | 4,33 | 2 | ##### | -0,97 |
|                                                           | #### | 0 | 1E-05   | 4,33 | 2 | ##### | -0,05 |
|                                                           | #### | 0 | 2,9E-05 | 4,32 | 2 | ##### | 0,68  |
|                                                           | #### | 0 | 2,7E-05 | 4,32 | 2 | ##### | -0,36 |
| C3(Carbamidomethyl); C19(Carbamidomethyl)                 | #### | 0 | 0,00146 | 4,32 | 3 | ##### | -1,76 |
|                                                           | #### | 0 | 3,5E-07 | 4,31 | 2 | ##### | -0,24 |
| M3(Oxidation)                                             | #### | 0 | 6,2E-06 | 4,31 | 2 | ##### | -0,06 |
|                                                           | #### | 0 | 0,00015 | 4,31 | 2 | ##### | -0,07 |
| C2(Carbamidomethyl)                                       | #### | 0 | 0,00148 | 4,31 | 2 | ##### | -2,68 |
|                                                           | #### | 0 | 6,9E-06 | 4,31 | 2 | ##### | -0,57 |
|                                                           | #### | 0 | 3,7E-06 | 4,30 | 3 | ##### | -0,07 |
|                                                           | #### | 0 | 0,00049 | 4,30 | 3 | ##### | -0,32 |
|                                                           | #### | 0 | 3,5E-08 | 4,29 | 3 | ##### | -0,28 |
|                                                           | #### | 0 | 0,00072 | 4,29 | 3 | ##### | 0,72  |



|                                    |      |   |         |      |   |       |       |
|------------------------------------|------|---|---------|------|---|-------|-------|
|                                    | #### | 0 | 3,1E-06 | 4,29 | 2 | ##### | -1,07 |
| M13(Oxidation)                     | #### | 0 | 1,1E-06 | 4,29 | 3 | ##### | -0,93 |
| M8(Oxidation)                      | #### | 0 | 0,00011 | 4,28 | 3 | ##### | -0,17 |
|                                    | #### | 0 | 1,5E-05 | 4,28 | 2 | ##### | -0,96 |
|                                    | #### | 0 | 0,00014 | 4,28 | 2 | ##### | -1,02 |
| C7(Carbamidomethyl)                | #### | 0 | 2,3E-07 | 4,28 | 2 | ##### | -0,29 |
|                                    | #### | 0 | 1,7E-05 | 4,28 | 2 | ##### | -2,46 |
|                                    | #### | 0 | 1,5E-06 | 4,27 | 3 | ##### | -1,06 |
| C3(Carbamidomethyl)                | #### | 0 | 2,2E-05 | 4,27 | 3 | ##### | 0,54  |
|                                    | #### | 0 | 2E-05   | 4,27 | 3 | ##### | -0,62 |
|                                    | #### | 0 | 8,9E-06 | 4,27 | 2 | ##### | 1,06  |
|                                    | #### | 0 | 2,9E-06 | 4,26 | 2 | ##### | 0,39  |
|                                    | #### | 0 | 1,3E-06 | 4,25 | 2 | ##### | -0,29 |
|                                    | #### | 0 | 4,4E-05 | 4,25 | 2 | ##### | -2,03 |
|                                    | #### | 0 | 1E-06   | 4,24 | 3 | ##### | -0,32 |
|                                    | #### | 0 | 0,00016 | 4,24 | 2 | ##### | -0,18 |
| C10(Carbamidomethyl)               | #### | 0 | 3,2E-05 | 4,23 | 2 | ##### | 1,04  |
|                                    | #### | 0 | 2,4E-06 | 4,23 | 2 | ##### | -0,68 |
|                                    | #### | 0 | 0,00029 | 4,23 | 2 | ##### | -0,23 |
| C4(Carbamidomethyl)                | #### | 0 | 0,00016 | 4,23 | 2 | ##### | -0,51 |
|                                    | #### | 0 | 2,7E-05 | 4,22 | 2 | ##### | -0,71 |
|                                    | #### | 0 | 2,8E-05 | 4,21 | 2 | ##### | -0,47 |
|                                    | #### | 0 | 7,3E-06 | 4,21 | 2 | ##### | -0,52 |
| C3(Carbamidomethyl)                | #### | 0 | 6E-06   | 4,20 | 3 | ##### | 0,04  |
|                                    | #### | 0 | 8,4E-05 | 4,19 | 3 | ##### | 1,71  |
| C17(Carbamidomethyl)               | #### | 0 | 1,2E-06 | 4,19 | 3 | ##### | 0,66  |
|                                    | #### | 0 | 0,00101 | 4,18 | 3 | ##### | -1,28 |
| M10(Oxidation)                     | #### | 0 | 1,1E-06 | 4,18 | 2 | ##### | -0,24 |
|                                    | #### | 0 | 0,00022 | 4,18 | 3 | ##### | 0,51  |
|                                    | #### | 0 | 2,2E-06 | 4,18 | 2 | ##### | -0,94 |
|                                    | #### | 0 | 0,00017 | 4,17 | 2 | ##### | 0,34  |
|                                    | #### | 0 | 0,0005  | 4,17 | 2 | ##### | -1,16 |
|                                    | #### | 0 | 6,1E-05 | 4,17 | 2 | ##### | 1,25  |
|                                    | #### | 0 | 4,8E-06 | 4,16 | 2 | ##### | -0,02 |
| M12(Oxidation); M16(Oxidation)     | #### | 0 | 4,1E-05 | 4,16 | 3 | ##### | -0,32 |
|                                    | #### | 0 | 6,9E-05 | 4,16 | 2 | ##### | -1,24 |
|                                    | #### | 0 | 4,4E-05 | 4,16 | 3 | ##### | 1,26  |
|                                    | #### | 0 | 0,00023 | 4,16 | 2 | ##### | -2,78 |
|                                    | #### | 0 | 7,2E-05 | 4,16 | 2 | ##### | -0,28 |
|                                    | #### | 0 | 8,9E-05 | 4,15 | 2 | ##### | -1,55 |
| M1(Oxidation)                      | #### | 0 | 2,4E-05 | 4,15 | 4 | ##### | 2,74  |
|                                    | #### | 0 | 0,0006  | 4,15 | 2 | ##### | -1,74 |
|                                    | #### | 0 | 0,00176 | 4,15 | 3 | ##### | -1,09 |
|                                    | #### | 0 | 1,7E-05 | 4,14 | 2 | ##### | -0,48 |
|                                    | #### | 0 | 3,6E-06 | 4,14 | 2 | ##### | -0,84 |
|                                    | #### | 0 | 0,00056 | 4,14 | 3 | ##### | 3,74  |
| C3(Carbamidomethyl); M4(Oxidation) | #### | 0 | 5,2E-05 | 4,14 | 2 | ##### | -0,88 |
|                                    | #### | 0 | 0,00019 | 4,13 | 3 | ##### | 5,82  |
|                                    | #### | 0 | 0,00028 | 4,13 | 2 | ##### | 0,74  |
|                                    | #### | 0 | 3,6E-07 | 4,13 | 2 | ##### | -0,04 |
|                                    | #### | 0 | 4,5E-05 | 4,13 | 2 | ##### | -0,16 |
|                                    | #### | 0 | 6,7E-06 | 4,12 | 2 | ##### | -0,37 |
|                                    | #### | 0 | 5,4E-06 | 4,12 | 2 | ##### | -0,44 |
|                                    | #### | 0 | 4,5E-06 | 4,12 | 2 | ##### | 1,05  |
|                                    | #### | 0 | 0,00051 | 4,11 | 2 | ##### | -0,48 |
| C6(Carbamidomethyl)                | #### | 0 | 3,8E-05 | 4,11 | 2 | ##### | -0,08 |
|                                    | #### | 0 | 0,00018 | 4,11 | 2 | ##### | 0,17  |
|                                    | #### | 0 | 0,00515 | 4,10 | 3 | ##### | -0,47 |
|                                    | #### | 0 | 1,2E-06 | 4,10 | 2 | ##### | -0,16 |

|                                    |      |   |         |      |   |       |       |
|------------------------------------|------|---|---------|------|---|-------|-------|
|                                    | #### | 0 | 6,6E-06 | 4,10 | 2 | ##### | 0,08  |
|                                    | #### | 0 | 3,4E-05 | 4,10 | 2 | ##### | -0,27 |
|                                    | #### | 0 | 1,3E-05 | 4,09 | 3 | ##### | 1,24  |
| M7(Oxidation); M8(Oxidation)       | #### | 0 | 2,4E-05 | 4,08 | 2 | ##### | 0,20  |
|                                    | #### | 0 | 4,7E-05 | 4,07 | 2 | ##### | 0,67  |
|                                    | #### | 0 | 0,00016 | 4,07 | 2 | ##### | -0,62 |
| M3(Oxidation); C4(Carbamidomethyl) | #### | 0 | 7,2E-05 | 4,07 | 3 | ##### | -1,50 |
|                                    | #### | 0 | 0,00033 | 4,07 | 2 | ##### | -1,32 |
| C11(Carbamidomethyl)               | #### | 0 | 3,1E-05 | 4,07 | 2 | ##### | -0,33 |
|                                    | #### | 0 | 3,2E-05 | 4,07 | 2 | ##### | 0,15  |
|                                    | #### | 0 | 2,8E-05 | 4,06 | 3 | ##### | 1,47  |
|                                    | #### | 0 | 9,9E-07 | 4,05 | 3 | ##### | 0,03  |
|                                    | #### | 0 | 0,00037 | 4,05 | 2 | ##### | -0,39 |
|                                    | #### | 0 | 0,00078 | 4,05 | 2 | ##### | -0,41 |
|                                    | #### | 0 | 6,5E-05 | 4,05 | 2 | ##### | 0,71  |
|                                    | #### | 0 | 0,00066 | 4,03 | 2 | ##### | -0,55 |
| C11(Carbamidomethyl)               | #### | 0 | 0,00044 | 4,02 | 3 | ##### | -0,38 |
|                                    | #### | 0 | 1,8E-06 | 4,02 | 2 | ##### | -0,39 |
|                                    | #### | 0 | 1,3E-05 | 4,02 | 2 | ##### | -0,85 |
|                                    | #### | 0 | 0,00155 | 4,02 | 3 | ##### | -0,13 |
| M1(Oxidation)                      | #### | 0 | 6,3E-06 | 4,01 | 2 | ##### | -0,83 |
|                                    | #### | 0 | 0,00025 | 4,00 | 3 | ##### | -0,30 |
|                                    | #### | 0 | 1,6E-05 | 4,00 | 2 | ##### | -1,60 |
|                                    | #### | 0 | 2,3E-05 | 4,00 | 2 | ##### | -2,03 |
|                                    | #### | 0 | 1,9E-05 | 3,99 | 2 | ##### | -0,12 |
|                                    | #### | 0 | 1,2E-05 | 3,97 | 2 | ##### | 0,42  |
|                                    | #### | 0 | 0,00019 | 3,97 | 2 | ##### | 1,11  |
| M7(Oxidation)                      | #### | 0 | 0,00064 | 3,96 | 2 | ##### | 0,23  |
|                                    | #### | 0 | 1,5E-05 | 3,96 | 2 | ##### | 0,94  |
|                                    | #### | 0 | 7,1E-06 | 3,95 | 2 | ##### | -0,85 |
|                                    | #### | 0 | 0,00071 | 3,95 | 2 | ##### | -0,57 |
|                                    | #### | 0 | 3,9E-05 | 3,94 | 2 | ##### | 0,01  |
|                                    | #### | 0 | 5,1E-05 | 3,94 | 2 | ##### | 0,50  |
|                                    | #### | 0 | 0,00021 | 3,94 | 2 | ##### | -0,97 |
|                                    | #### | 0 | 1E-04   | 3,93 | 2 | ##### | 1,34  |
|                                    | #### | 0 | 0,00061 | 3,93 | 2 | ##### | -0,69 |
|                                    | #### | 0 | 2,8E-05 | 3,93 | 3 | ##### | -0,10 |
|                                    | #### | 0 | 3E-06   | 3,93 | 2 | ##### | -0,16 |
|                                    | #### | 0 | 0,00076 | 3,93 | 2 | ##### | -0,50 |
|                                    | #### | 0 | 0,00042 | 3,92 | 2 | ##### | -0,31 |
|                                    | #### | 0 | 6,7E-05 | 3,92 | 2 | ##### | -1,75 |
|                                    | #### | 0 | 2,8E-05 | 3,92 | 2 | ##### | -0,45 |
| C3(Carbamidomethyl)                | #### | 0 | 3,9E-05 | 3,91 | 2 | ##### | -0,41 |
| M3(Oxidation)                      | #### | 0 | 0,0002  | 3,91 | 2 | ##### | -0,32 |
|                                    | #### | 0 | 0,00039 | 3,91 | 2 | ##### | -2,97 |
|                                    | #### | 0 | 6,3E-05 | 3,90 | 2 | ##### | -0,52 |
|                                    | #### | 0 | 6,9E-06 | 3,90 | 2 | ##### | -0,82 |
|                                    | #### | 0 | 3,7E-05 | 3,89 | 4 | ##### | -0,30 |
| M14(Oxidation)                     | #### | 0 | 4,6E-05 | 3,89 | 3 | ##### | 1,10  |
|                                    | #### | 0 | 9,3E-05 | 3,89 | 2 | ##### | -0,08 |
| C3(Carbamidomethyl)                | #### | 0 | 4,1E-05 | 3,89 | 2 | ##### | -0,43 |
|                                    | #### | 0 | 1,3E-05 | 3,89 | 2 | ##### | -0,44 |
|                                    | #### | 0 | 8,3E-05 | 3,88 | 2 | ##### | -0,06 |
| M5(Oxidation); C7(Carbamidomethyl) | #### | 0 | 0,00018 | 3,87 | 2 | ##### | -0,84 |
|                                    | #### | 0 | 0,00022 | 3,87 | 2 | ##### | -1,50 |
|                                    | #### | 0 | 0,00023 | 3,87 | 3 | ##### | -0,76 |
|                                    | #### | 0 | 1,9E-05 | 3,86 | 2 | ##### | -0,82 |
| M10(Oxidation)                     | #### | 0 | 3E-05   | 3,86 | 2 | ##### | -0,42 |
|                                    | #### | 0 | 0,00019 | 3,86 | 3 | ##### | 0,50  |

|                                                   |      |   |         |      |   |           |       |
|---------------------------------------------------|------|---|---------|------|---|-----------|-------|
|                                                   | #### | 0 | 8,8E-05 | 3,85 | 2 | #####     | -0,57 |
| M3(Oxidation); M7(Oxidation); C8(Carbamidomethyl) | #### | 0 | 0,00013 | 3,85 | 2 | #####     | -1,44 |
| M9(Oxidation)                                     | #### | 0 | 9,9E-06 | 3,85 | 3 | #####     | 0,19  |
|                                                   | #### | 0 | 7,7E-07 | 3,85 | 3 | #####     | 0,17  |
|                                                   | #### | 0 | 7E-06   | 3,83 | 2 | #####     | -0,41 |
|                                                   | #### | 0 | 2,6E-05 | 3,83 | 3 | #####     | -1,12 |
|                                                   | #### | 0 | 6,5E-05 | 3,83 | 2 | #####     | -1,05 |
|                                                   | #### | 0 | 1,1E-06 | 3,83 | 2 | #####     | -0,37 |
|                                                   | #### | 0 | 6,7E-07 | 3,82 | 3 | #####     | 0,49  |
| M3(Oxidation)                                     | #### | 0 | 2,8E-05 | 3,82 | 3 | #####     | 0,04  |
|                                                   | #### | 0 | 7,7E-05 | 3,82 | 2 | #####     | 0,45  |
|                                                   | #### | 0 | 0,00172 | 3,82 | 2 | #####     | -0,13 |
| M11(Oxidation)                                    | #### | 0 | 0,0003  | 3,82 | 3 | #####     | 3,81  |
|                                                   | #### | 0 | 0,00075 | 3,81 | 2 | #####     | -1,32 |
|                                                   | #### | 0 | 0,00016 | 3,81 | 2 | #####     | -1,61 |
|                                                   | #### | 0 | 0,00021 | 3,81 | 2 | #####     | -0,93 |
| M3(Oxidation)                                     | #### | 0 | 1E-05   | 3,81 | 3 | #####     | -0,21 |
|                                                   | #### | 0 | 6,9E-05 | 3,80 | 2 | #####     | -0,64 |
|                                                   | #### | 0 | 5,3E-05 | 3,80 | 2 | #####     | 0,17  |
|                                                   | #### | 0 | 0,00015 | 3,80 | 2 | #####     | 0,95  |
| C19(Carbamidomethyl)                              | #### | 0 | 0,0008  | 3,79 | 3 | #####     | 2,49  |
|                                                   | #### | 0 | 1,3E-06 | 3,78 | 3 | #####     | -1,80 |
|                                                   | #### | 0 | 1,1E-05 | 3,78 | 2 | #####     | -0,17 |
|                                                   | #### | 0 | 0,0048  | 3,78 | 2 | #####     | -0,11 |
| M10(Oxidation)                                    | #### | 0 | 0,00163 | 3,77 | 3 | #####     | -5,82 |
| C15(Carbamidomethyl)                              | #### | 0 | 4,7E-05 | 3,77 | 3 | #####     | -0,43 |
|                                                   | #### | 0 | 0,00093 | 3,77 | 2 | #####     | -0,70 |
|                                                   | #### | 0 | 4,7E-09 | 3,76 | 3 | #####     | -0,52 |
|                                                   | #### | 0 | 0,00282 | 3,76 | 2 | #####     | -1,57 |
|                                                   | #### | 0 | 1,9E-06 | 3,76 | 2 | #####     | 0,02  |
|                                                   | #### | 0 | 0,00453 | 3,76 | 3 | #####     | -1,16 |
|                                                   | #### | 0 | 0,00014 | 3,76 | 2 | #####     | 0,29  |
|                                                   | #### | 0 | 5,4E-05 | 3,76 | 2 | #####     | 0,44  |
|                                                   | #### | 0 | 0,0001  | 3,76 | 2 | #####     | 0,21  |
|                                                   | #### | 0 | 9,1E-05 | 3,75 | 2 | #####     | -2,47 |
|                                                   | #### | 0 | 0,00266 | 3,75 | 2 | #####     | -1,35 |
|                                                   | #### | 0 | 0,00013 | 3,75 | 2 | #####     | -0,31 |
|                                                   | #### | 0 | 0,0001  | 3,75 | 2 | #####     | -0,51 |
|                                                   | #### | 0 | 0,00012 | 3,74 | 2 | #####     | -0,73 |
|                                                   | #### | 0 | 0,00011 | 3,74 | 2 | #####     | -0,23 |
|                                                   | #### | 0 | 0,0031  | 3,74 | 3 | #####     | 2,06  |
|                                                   | #### | 0 | 0,0005  | 3,73 | 2 | #####     | -0,59 |
| C18(Carbamidomethyl)                              | #### | 0 | 6,2E-06 | 3,73 | 3 | #####     | -0,67 |
|                                                   | #### | 0 | 1,9E-05 | 3,73 | 2 | #####     | 0,37  |
| M9(Oxidation)                                     | #### | 0 | 0,00014 | 3,72 | 2 | #####     | -0,04 |
|                                                   | #### | 0 | 1,8E-06 | 3,72 | 3 | #####     | -0,04 |
|                                                   | #### | 0 | 0,00029 | 3,72 | 2 | #####     | -2,21 |
|                                                   | #### | 0 | 0,00344 | 3,72 | 3 | #####     | 0,63  |
|                                                   | #### | 0 | 0,00011 | 3,71 | 2 | 976,44756 | -0,81 |
|                                                   | #### | 0 | 0,00011 | 3,71 | 2 | #####     | -0,37 |
|                                                   | #### | 0 | 0,00017 | 3,70 | 2 | #####     | -1,14 |
| C7(Carbamidomethyl)                               | #### | 0 | 9,8E-05 | 3,70 | 2 | #####     | -0,54 |
| C4(Carbamidomethyl)                               | #### | 0 | 5,4E-05 | 3,70 | 3 | #####     | 0,73  |
|                                                   | #### | 0 | 5,1E-05 | 3,70 | 2 | #####     | -0,50 |
|                                                   | #### | 0 | 0,00091 | 3,69 | 2 | #####     | -1,81 |
|                                                   | #### | 0 | 0,00012 | 3,69 | 2 | #####     | -1,09 |
|                                                   | #### | 0 | 4,9E-05 | 3,69 | 2 | #####     | -0,12 |
| M12(Oxidation)                                    | #### | 0 | 1,4E-05 | 3,67 | 4 | #####     | 1,46  |
|                                                   | #### | 0 | 5,3E-05 | 3,67 | 2 | #####     | 0,19  |

|                                |      |   |         |      |   |           |       |
|--------------------------------|------|---|---------|------|---|-----------|-------|
|                                | #### | 0 | 0,00197 | 3,66 | 2 | #####     | -0,10 |
|                                | #### | 0 | 0,0002  | 3,66 | 2 | #####     | -1,57 |
|                                | #### | 0 | 3,8E-05 | 3,66 | 2 | #####     | 1,02  |
|                                | #### | 0 | 8,8E-05 | 3,66 | 2 | #####     | 0,09  |
|                                | #### | 0 | 3,5E-05 | 3,65 | 2 | #####     | 1,22  |
|                                | #### | 0 | 0,0025  | 3,65 | 2 | #####     | -0,29 |
| M11(Oxidation)                 | #### | 0 | 1,8E-05 | 3,65 | 3 | #####     | 0,82  |
| M6(Oxidation)                  | #### | 0 | 0,00021 | 3,65 | 2 | #####     | 0,97  |
|                                | #### | 0 | 4,7E-05 | 3,65 | 2 | #####     | -0,56 |
|                                | #### | 0 | 2,2E-05 | 3,64 | 2 | #####     | 0,03  |
|                                | #### | 0 | 0,00273 | 3,64 | 2 | #####     | 0,35  |
|                                | #### | 0 | 0,00153 | 3,64 | 2 | #####     | -0,63 |
|                                | #### | 0 | 1,9E-06 | 3,64 | 3 | #####     | -0,92 |
|                                | #### | 0 | 0,00501 | 3,63 | 2 | #####     | -1,15 |
|                                | #### | 0 | 0,00041 | 3,63 | 2 | #####     | -1,32 |
|                                | #### | 0 | 0,00014 | 3,63 | 2 | #####     | -0,01 |
|                                | #### | 0 | 5,8E-05 | 3,63 | 2 | #####     | 0,04  |
|                                | #### | 0 | 1E-04   | 3,63 | 2 | #####     | -1,89 |
|                                | #### | 0 | 0,00015 | 3,62 | 2 | #####     | 0,24  |
|                                | #### | 0 | 3E-05   | 3,62 | 2 | #####     | -1,46 |
| C1(Carbamidomethyl)            | #### | 0 | 2,1E-05 | 3,60 | 3 | #####     | 0,40  |
|                                | #### | 0 | 0,00052 | 3,60 | 3 | #####     | 0,69  |
|                                | #### | 0 | 0,00322 | 3,60 | 2 | #####     | -0,19 |
|                                | #### | 0 | 2,8E-05 | 3,60 | 2 | #####     | -0,81 |
|                                | #### | 0 | 0,00038 | 3,59 | 3 | #####     | 0,21  |
| M4(Oxidation)                  | #### | 0 | 0,00039 | 3,59 | 2 | #####     | -2,02 |
|                                | #### | 0 | 0,00042 | 3,59 | 2 | #####     | -0,07 |
| M24(Oxidation); M26(Oxidation) | #### | 0 | 0,00159 | 3,59 | 4 | #####     | -0,58 |
|                                | #### | 0 | 2,8E-05 | 3,58 | 2 | #####     | 0,51  |
|                                | #### | 0 | 0,00064 | 3,57 | 2 | #####     | 0,82  |
|                                | #### | 0 | 0,00516 | 3,57 | 2 | #####     | -0,29 |
| M2(Oxidation)                  | #### | 0 | 2,3E-05 | 3,56 | 3 | #####     | -0,37 |
|                                | #### | 0 | 0,00023 | 3,56 | 4 | #####     | -0,11 |
|                                | #### | 0 | 4,2E-05 | 3,55 | 3 | #####     | -0,41 |
|                                | #### | 0 | 0,00062 | 3,55 | 3 | #####     | -0,98 |
|                                | #### | 0 | 0,00503 | 3,55 | 2 | #####     | -0,88 |
|                                | #### | 0 | 0,00176 | 3,53 | 2 | #####     | -0,44 |
|                                | #### | 0 | 3,9E-06 | 3,53 | 3 | #####     | -0,08 |
|                                | #### | 0 | 0,00097 | 3,53 | 3 | #####     | -1,06 |
|                                | #### | 0 | 0,0001  | 3,53 | 2 | #####     | -0,38 |
|                                | #### | 0 | 0,00252 | 3,53 | 3 | #####     | -0,18 |
|                                | #### | 0 | 0,00165 | 3,52 | 2 | #####     | -0,50 |
|                                | #### | 0 | 0,00071 | 3,52 | 2 | #####     | -1,87 |
| M9(Oxidation)                  | #### | 0 | 0,00015 | 3,51 | 2 | #####     | 0,70  |
| C7(Carbamidomethyl)            | #### | 0 | 0,00017 | 3,50 | 2 | #####     | 0,36  |
|                                | #### | 0 | 0,00022 | 3,50 | 2 | #####     | -1,56 |
| M16(Oxidation)                 | #### | 0 | 5,4E-06 | 3,50 | 4 | #####     | -0,37 |
|                                | #### | 0 | 0,00013 | 3,50 | 2 | 988,54167 | -0,55 |
|                                | #### | 0 | 0,00072 | 3,49 | 2 | #####     | 0,58  |
| C11(Carbamidomethyl)           | #### | 0 | 4,9E-05 | 3,49 | 2 | #####     | -0,76 |
|                                | #### | 0 | 7,8E-05 | 3,48 | 2 | #####     | 0,49  |
|                                | #### | 0 | 9,4E-05 | 3,48 | 4 | #####     | -0,21 |
|                                | #### | 0 | 0,00067 | 3,47 | 3 | #####     | -0,97 |
| C1(Carbamidomethyl)            | #### | 0 | 0,00019 | 3,47 | 2 | #####     | 0,25  |
|                                | #### | 0 | 0,00016 | 3,47 | 2 | #####     | 1,16  |
|                                | #### | 0 | 0,00338 | 3,47 | 2 | #####     | 2,48  |
|                                | #### | 0 | 0,00057 | 3,47 | 2 | #####     | -1,06 |
|                                | #### | 0 | 1,8E-05 | 3,46 | 2 | #####     | -1,28 |
|                                | #### | 0 | 3,3E-06 | 3,44 | 3 | #####     | -0,77 |

|                     |      |   |         |      |   |           |       |
|---------------------|------|---|---------|------|---|-----------|-------|
|                     | #### | 0 | 6,9E-05 | 3,44 | 2 | #####     | -0,65 |
| M13(Oxidation)      | #### | 0 | 0,00346 | 3,44 | 2 | #####     | -1,27 |
|                     | #### | 0 | 0,00015 | 3,44 | 2 | #####     | -0,38 |
|                     | #### | 0 | 2,2E-06 | 3,43 | 3 | #####     | -0,57 |
|                     | #### | 0 | 9,8E-05 | 3,43 | 3 | #####     | -2,40 |
|                     | #### | 0 | 0,00508 | 3,42 | 2 | 987,54656 | -0,44 |
| C7(Carbamidomethyl) | #### | 0 | 0,00022 | 3,42 | 2 | #####     | -0,32 |
|                     | #### | 0 | 0,0001  | 3,41 | 2 | #####     | 1,29  |
|                     | #### | 0 | 0,00131 | 3,41 | 2 | #####     | -1,62 |
|                     | #### | 0 | 0,00325 | 3,40 | 2 | #####     | -0,36 |
|                     | #### | 0 | 0,00027 | 3,40 | 2 | #####     | -0,74 |
|                     | #### | 0 | 6E-05   | 3,40 | 3 | #####     | 0,41  |
|                     | #### | 0 | 0,00188 | 3,40 | 2 | #####     | -0,51 |
|                     | #### | 0 | 7E-05   | 3,39 | 2 | #####     | -0,05 |
|                     | #### | 0 | 0,00129 | 3,38 | 2 | #####     | -0,93 |
|                     | #### | 0 | 4,2E-05 | 3,38 | 2 | #####     | 0,27  |
|                     | #### | 0 | 0,00013 | 3,38 | 3 | #####     | -1,95 |
|                     | #### | 0 | 0,00353 | 3,37 | 2 | #####     | -0,96 |
|                     | #### | 0 | 0,00021 | 3,37 | 2 | #####     | 0,07  |
|                     | #### | 0 | 0,0003  | 3,37 | 2 | 975,51042 | -0,18 |
| M29(Oxidation)      | #### | 0 | 1,1E-05 | 3,36 | 5 | #####     | -0,60 |
|                     | #### | 0 | 0,00114 | 3,35 | 3 | #####     | -0,10 |
|                     | #### | 0 | 0,00107 | 3,35 | 2 | #####     | -0,40 |
|                     | #### | 0 | 0,00208 | 3,35 | 2 | #####     | -1,11 |
|                     | #### | 0 | 0,00074 | 3,35 | 2 | #####     | 0,38  |
|                     | #### | 0 | 4,4E-05 | 3,34 | 3 | #####     | -0,90 |
|                     | #### | 0 | 4,1E-05 | 3,34 | 2 | #####     | -1,24 |
|                     | #### | 0 | 2,9E-05 | 3,34 | 2 | #####     | -0,10 |
|                     | #### | 0 | 0,0002  | 3,33 | 2 | #####     | -0,73 |
|                     | #### | 0 | 0,00179 | 3,33 | 3 | #####     | -0,33 |
|                     | #### | 0 | 0,00067 | 3,33 | 3 | #####     | -1,74 |
|                     | #### | 0 | 0,00038 | 3,33 | 2 | #####     | 2,39  |
|                     | #### | 0 | 5,2E-05 | 3,33 | 2 | #####     | -0,47 |
|                     | #### | 0 | 4E-05   | 3,32 | 2 | #####     | -0,78 |
|                     | #### | 0 | 0,00062 | 3,32 | 2 | #####     | 0,03  |
|                     | #### | 0 | 0,00081 | 3,31 | 2 | #####     | -0,59 |
|                     | #### | 0 | 0,00114 | 3,30 | 2 | #####     | -1,42 |
|                     | #### | 0 | 0,00259 | 3,29 | 2 | #####     | 1,12  |
|                     | #### | 0 | 0,00052 | 3,29 | 2 | #####     | -0,34 |
|                     | #### | 0 | 0,00432 | 3,29 | 2 | #####     | -2,52 |
| M8(Oxidation)       | #### | 0 | 0,00286 | 3,28 | 2 | #####     | -4,45 |
|                     | #### | 0 | 0,0028  | 3,28 | 2 | 935,49498 | 0,46  |
|                     | #### | 0 | 2,4E-05 | 3,28 | 2 | #####     | -0,10 |
|                     | #### | 0 | 0,00014 | 3,26 | 2 | #####     | 0,86  |
|                     | #### | 0 | 0,00368 | 3,26 | 2 | #####     | -1,13 |
|                     | #### | 0 | 0,00094 | 3,26 | 2 | #####     | -0,07 |
|                     | #### | 0 | 0,00591 | 3,25 | 2 | #####     | -0,20 |
|                     | #### | 0 | 0,00027 | 3,24 | 2 | #####     | -0,54 |
|                     | #### | 0 | 3E-05   | 3,24 | 2 | #####     | -0,34 |
|                     | #### | 0 | 0,00012 | 3,24 | 2 | #####     | -0,40 |
|                     | #### | 0 | 0,00559 | 3,24 | 2 | #####     | -0,17 |
|                     | #### | 0 | 0,0014  | 3,24 | 3 | #####     | -0,27 |
|                     | #### | 0 | 0,00072 | 3,23 | 2 | #####     | -0,92 |
|                     | #### | 0 | 0,00038 | 3,23 | 2 | #####     | 0,11  |
|                     | #### | 0 | 0,00044 | 3,23 | 2 | #####     | 1,61  |
|                     | #### | 0 | 0,0005  | 3,22 | 2 | #####     | 0,22  |
|                     | #### | 0 | 0,00516 | 3,22 | 3 | #####     | -0,62 |
|                     | #### | 0 | 9,3E-05 | 3,21 | 2 | #####     | -0,07 |
|                     | #### | 0 | 0,00142 | 3,20 | 3 | #####     | 0,25  |

|                                             |      |   |         |      |   |           |       |
|---------------------------------------------|------|---|---------|------|---|-----------|-------|
|                                             | #### | 0 | 0,00103 | 3,20 | 2 | #####     | -0,37 |
|                                             | #### | 0 | 0,00068 | 3,20 | 2 | #####     | 0,86  |
|                                             | #### | 0 | 0,00015 | 3,18 | 2 | #####     | -0,45 |
| M5(Oxidation)                               | #### | 0 | 0,00052 | 3,18 | 2 | #####     | 1,40  |
|                                             | #### | 0 | 0,00051 | 3,18 | 3 | #####     | -0,60 |
|                                             | #### | 0 | 0,0038  | 3,18 | 2 | #####     | -0,45 |
|                                             | #### | 0 | 0,00451 | 3,17 | 2 | #####     | 0,04  |
|                                             | #### | 0 | 0,00211 | 3,17 | 2 | #####     | 0,00  |
|                                             | #### | 0 | 4,4E-05 | 3,16 | 3 | #####     | -1,72 |
|                                             | #### | 0 | 0,00586 | 3,16 | 3 | #####     | 4,92  |
|                                             | #### | 0 | 0,00272 | 3,15 | 2 | #####     | -0,30 |
| C9(Carbamidomethyl)                         | #### | 0 | 0,00202 | 3,14 | 2 | #####     | 0,05  |
|                                             | #### | 0 | 0,00243 | 3,12 | 2 | #####     | 1,67  |
| M5(Oxidation)                               | #### | 0 | 0,00474 | 3,12 | 2 | #####     | -1,21 |
|                                             | #### | 0 | 0,00111 | 3,12 | 2 | #####     | -0,80 |
|                                             | #### | 0 | 8,6E-05 | 3,10 | 2 | #####     | -0,02 |
|                                             | #### | 0 | 4,7E-06 | 3,10 | 2 | #####     | -0,72 |
|                                             | #### | 0 | 0,00163 | 3,09 | 2 | 938,52941 | -1,28 |
|                                             | #### | 0 | 0,00038 | 3,08 | 2 | #####     | -0,70 |
|                                             | #### | 0 | 0,00022 | 3,08 | 2 | #####     | -0,02 |
|                                             | #### | 0 | 0,00028 | 3,08 | 2 | 991,59300 | -0,54 |
|                                             | #### | 0 | 0,00216 | 3,07 | 2 | 920,48241 | -1,34 |
|                                             | #### | 0 | 0,0018  | 3,07 | 2 | #####     | -0,49 |
|                                             | #### | 0 | 0,00152 | 3,07 | 2 | #####     | -0,59 |
|                                             | #### | 0 | 0,00141 | 3,07 | 2 | #####     | -1,92 |
| M4(Oxidation)                               | #### | 0 | 0,00287 | 3,06 | 2 | 997,44023 | -0,59 |
|                                             | #### | 0 | 0,00123 | 3,05 | 2 | #####     | -0,76 |
|                                             | #### | 0 | 0,00027 | 3,05 | 2 | #####     | -0,30 |
|                                             | #### | 0 | 0,00081 | 3,03 | 3 | #####     | -1,60 |
|                                             | #### | 0 | 0,00063 | 3,01 | 2 | #####     | -0,25 |
|                                             | #### | 0 | 0,00058 | 3,00 | 3 | #####     | 1,96  |
| M3(Oxidation); M4(Oxidation)                | #### | 0 | 0,00325 | 3,00 | 2 | #####     | -0,83 |
|                                             | #### | 0 | 0,00025 | 2,98 | 2 | #####     | -1,26 |
| C6(Carbamidomethyl)                         | #### | 0 | 0,00036 | 2,98 | 3 | #####     | 0,68  |
| M2(Oxidation); M4(Oxidation); M5(Oxidation) | #### | 0 | 8,6E-05 | 2,98 | 2 | #####     | -0,07 |
|                                             | #### | 0 | 0,00235 | 2,97 | 2 | 947,42064 | -1,21 |
|                                             | #### | 0 | 0,00215 | 2,97 | 2 | #####     | -1,03 |
|                                             | #### | 0 | 0,00425 | 2,96 | 2 | 934,50212 | -1,29 |
| M11(Oxidation)                              | #### | 0 | 3,8E-05 | 2,96 | 3 | #####     | -0,20 |
|                                             | #### | 0 | 0,00384 | 2,96 | 2 | #####     | -1,79 |
|                                             | #### | 0 | 0,00179 | 2,95 | 2 | #####     | 0,27  |
|                                             | #### | 0 | 0,00014 | 2,95 | 2 | #####     | -0,30 |
|                                             | #### | 0 | 0,00428 | 2,95 | 2 | 861,47936 | 0,53  |
|                                             | #### | 0 | 5,4E-05 | 2,95 | 2 | #####     | -0,95 |
|                                             | #### | 0 | 0,00089 | 2,95 | 2 | 987,48955 | 0,12  |
|                                             | #### | 0 | 6,5E-05 | 2,95 | 2 | 968,61382 | -0,14 |
| M3(Oxidation)                               | #### | 0 | 0,00088 | 2,93 | 2 | 963,48174 | 0,13  |
| C2(Carbamidomethyl)                         | #### | 0 | 0,0008  | 2,93 | 3 | #####     | -1,32 |
|                                             | #### | 0 | 0,00249 | 2,92 | 2 | 955,44780 | -0,18 |
|                                             | #### | 0 | 0,00103 | 2,92 | 2 | 996,51097 | 0,05  |
|                                             | #### | 0 | 0,00244 | 2,92 | 2 | #####     | 0,10  |
|                                             | #### | 0 | 0,00136 | 2,91 | 2 | #####     | -1,01 |
|                                             | #### | 0 | 2,4E-05 | 2,91 | 3 | #####     | 0,20  |
|                                             | #### | 0 | 0,00022 | 2,91 | 3 | #####     | -0,33 |
|                                             | #### | 0 | 0,00231 | 2,90 | 2 | 826,51396 | -0,72 |
|                                             | #### | 0 | 0,00095 | 2,89 | 3 | #####     | -0,38 |
|                                             | #### | 0 | 0,00088 | 2,88 | 2 | #####     | -0,28 |
|                                             | #### | 0 | 0,00573 | 2,88 | 2 | 988,46257 | 0,34  |
|                                             | #### | 0 | 0,00079 | 2,88 | 2 | #####     | -1,42 |

|                                                            |      |       |         |      |   |           |       |
|------------------------------------------------------------|------|-------|---------|------|---|-----------|-------|
| C14(Carbamidomethyl); C16(Carbamidomethyl); M17(Oxidation) | #### | 0     | 0,00063 | 2,87 | 2 | #####     | 0,74  |
| M4(Oxidation)                                              | #### | 0     | 0,00215 | 2,87 | 3 | #####     | 0,53  |
|                                                            | #### | 0     | 0,00105 | 2,86 | 2 | #####     | -1,66 |
|                                                            | #### | 0     | 0,00027 | 2,86 | 3 | #####     | 0,70  |
|                                                            | #### | 0     | 0,0014  | 2,86 | 2 | 887,51952 | -0,22 |
|                                                            | #### | 0     | 0,00114 | 2,85 | 2 | 975,56182 | -0,44 |
|                                                            | #### | 0     | 0,00233 | 2,84 | 2 | 947,51598 | 0,32  |
|                                                            | #### | 0     | 0,00594 | 2,84 | 2 | #####     | 0,12  |
|                                                            | #### | 0     | 0,00039 | 2,84 | 3 | #####     | -0,09 |
|                                                            | #### | 0     | 0,00087 | 2,82 | 2 | #####     | 0,06  |
|                                                            | #### | 0     | 0,00065 | 2,82 | 4 | #####     | 0,43  |
|                                                            | #### | 0     | 1,3E-05 | 2,81 | 2 | #####     | 0,45  |
|                                                            | #### | 0     | 0,006   | 2,81 | 2 | #####     | 0,28  |
|                                                            | #### | 0     | 0,00217 | 2,80 | 2 | 948,52696 | 0,84  |
|                                                            | #### | 0     | 0,00588 | 2,80 | 3 | #####     | -0,43 |
|                                                            | #### | 0     | 0,00249 | 2,78 | 2 | 944,47215 | -0,26 |
| M8(Oxidation)                                              | #### | 0     | 0,00271 | 2,77 | 2 | #####     | -0,64 |
| M16(Oxidation)                                             | #### | 0     | 0,00541 | 2,76 | 3 | #####     | -1,33 |
|                                                            | #### | 0     | 5,7E-05 | 2,75 | 3 | #####     | -0,60 |
|                                                            | #### | 0     | 0,00053 | 2,74 | 2 | 921,51476 | -0,58 |
| M3(Oxidation)                                              | #### | 0     | 0,00365 | 2,74 | 2 | #####     | -0,90 |
|                                                            | #### | 0     | 0,00041 | 2,73 | 3 | #####     | -0,06 |
|                                                            | #### | 0     | 0,00257 | 2,72 | 2 | #####     | -0,25 |
|                                                            | #### | 0     | 2,8E-05 | 2,70 | 3 | #####     | -0,50 |
|                                                            | #### | 0     | 0,00105 | 2,69 | 2 | 982,49370 | -1,59 |
|                                                            | #### | 0     | 0,00214 | 2,63 | 3 | #####     | 1,05  |
|                                                            | #### | 0     | 6,3E-05 | 2,63 | 3 | #####     | -1,45 |
|                                                            | #### | 0     | 0,00482 | 2,62 | 2 | 850,52471 | -1,26 |
|                                                            | #### | 0     | 0,00153 | 2,62 | 2 | #####     | 0,85  |
|                                                            | #### | 0     | 0,00066 | 2,61 | 2 | #####     | -0,71 |
| M5(Oxidation)                                              | #### | 0     | 0,00275 | 2,60 | 2 | #####     | -0,18 |
|                                                            | #### | 0     | 0,0002  | 2,60 | 3 | #####     | -0,67 |
|                                                            | #### | 0     | 0,00356 | 2,59 | 2 | 889,50987 | -0,37 |
|                                                            | #### | 0     | 0,00117 | 2,59 | 2 | 891,45342 | 0,38  |
|                                                            | #### | 0     | 0,00339 | 2,57 | 2 | 965,48381 | -0,18 |
|                                                            | #### | 0     | 0,00287 | 2,54 | 2 | #####     | 0,12  |
|                                                            | #### | 0     | 0,00023 | 2,53 | 4 | #####     | 1,48  |
|                                                            | #### | 0     | 0,00228 | 2,51 | 2 | #####     | -0,47 |
|                                                            | #### | 0     | 0,0009  | 2,49 | 2 | #####     | -0,23 |
| C5(Carbamidomethyl); C8(Carbamidomethyl)                   | #### | 0     | 0,00031 | 2,49 | 3 | #####     | 0,03  |
|                                                            | #### | 0     | 0,00335 | 2,42 | 2 | 858,50395 | -0,51 |
|                                                            | #### | 0     | 0,00542 | 2,35 | 2 | 954,45305 | 0,32  |
|                                                            | #### | 0     | 0,00165 | 2,31 | 2 | #####     | -0,65 |
|                                                            | #### | 0     | 0,00348 | 2,28 | 4 | #####     | 0,48  |
|                                                            | #### | 0     | 0,00346 | 2,27 | 3 | #####     | -0,18 |
|                                                            | #### | 0     | 0,00131 | 2,23 | 4 | #####     | 1,60  |
|                                                            | #### | 0     | 0,00426 | 2,18 | 2 | 875,53484 | -0,14 |
|                                                            | #### | 0     | 4,5E-05 | 2,15 | 4 | #####     | -0,02 |
|                                                            | #### | 0     | 0,00531 | 2,07 | 3 | #####     | -2,38 |
|                                                            | #### | 0     | 7E-05   | 1,89 | 3 | #####     | -0,29 |
|                                                            | #### | 0     | 0,00042 | 1,86 | 4 | #####     | -0,46 |
|                                                            | #### | 0     | 1,9E-05 | 1,85 | 4 | #####     | -0,04 |
| M8(Oxidation)                                              | #### | 0,001 | 0,07841 | 4,31 | 3 | #####     | 0,28  |
|                                                            | #### | 0,001 | 0,05677 | 4,28 | 3 | #####     | -4,12 |
| C31(Carbamidomethyl)                                       | #### | 0,001 | 0,02218 | 4,15 | 3 | #####     | -5,19 |
|                                                            | #### | 0,001 | 0,03788 | 4,09 | 3 | #####     | 0,27  |
|                                                            | #### | 0,001 | 0,05025 | 4,05 | 3 | #####     | 0,97  |
|                                                            | #### | 0,001 | 0,0107  | 4,04 | 3 | #####     | -0,79 |
|                                                            | #### | 0,001 | 0,00679 | 3,92 | 3 | #####     | 1,13  |

|                                            |      |       |         |      |   |           |       |
|--------------------------------------------|------|-------|---------|------|---|-----------|-------|
|                                            | #### | 0,001 | 0,01002 | 3,89 | 3 | #####     | -2,57 |
| C7(Carbamidomethyl)                        | #### | 0,001 | 0,00847 | 3,77 | 2 | #####     | -0,32 |
|                                            | #### | 0,001 | 0,00743 | 3,68 | 2 | #####     | -0,50 |
|                                            | #### | 0,001 | 0,01053 | 3,64 | 2 | #####     | 1,09  |
| M10(Oxidation)                             | #### | 0,001 | 0,01526 | 3,58 | 3 | #####     | -0,42 |
| C5(Carbamidomethyl); C10(Carbamidomethyl)  | #### | 0,001 | 0,01441 | 3,58 | 2 | #####     | -0,65 |
|                                            | #### | 0,001 | 0,00949 | 3,56 | 2 | #####     | -0,27 |
|                                            | #### | 0,001 | 0,03732 | 3,56 | 2 | #####     | 5,43  |
|                                            | #### | 0,001 | 0,00767 | 3,56 | 2 | #####     | -0,69 |
| M11(Oxidation)                             | #### | 0,001 | 0,07928 | 3,53 | 3 | #####     | 0,15  |
| M3(Oxidation)                              | #### | 0,001 | 0,00796 | 3,52 | 3 | #####     | 1,03  |
|                                            | #### | 0,001 | 0,01911 | 3,51 | 2 | #####     | -2,36 |
|                                            | #### | 0,001 | 0,00601 | 3,50 | 4 | #####     | 3,24  |
|                                            | #### | 0,001 | 0,02481 | 3,49 | 2 | #####     | -0,71 |
|                                            | #### | 0,001 | 0,00677 | 3,46 | 2 | #####     | -0,63 |
|                                            | #### | 0,001 | 0,009   | 3,44 | 2 | #####     | 0,35  |
|                                            | #### | 0,001 | 0,00881 | 3,42 | 2 | #####     | 0,18  |
|                                            | #### | 0,001 | 0,017   | 3,41 | 2 | #####     | -0,67 |
|                                            | #### | 0,001 | 0,058   | 3,41 | 2 | #####     | 0,70  |
| M3(Oxidation)                              | #### | 0,001 | 0,00613 | 3,40 | 3 | #####     | -0,41 |
| M5(Oxidation)                              | #### | 0,001 | 0,06986 | 3,40 | 3 | #####     | 1,80  |
|                                            | #### | 0,001 | 0,01654 | 3,38 | 3 | #####     | 0,15  |
|                                            | #### | 0,001 | 0,0747  | 3,38 | 2 | #####     | 2,70  |
|                                            | #### | 0,001 | 0,06521 | 3,37 | 2 | 929,52910 | -1,26 |
|                                            | #### | 0,001 | 0,00623 | 3,34 | 2 | #####     | -0,94 |
|                                            | #### | 0,001 | 0,0647  | 3,34 | 2 | #####     | -1,73 |
| C21(Carbamidomethyl); C29(Carbamidomethyl) | #### | 0,001 | 0,0147  | 3,31 | 4 | #####     | -2,70 |
| M1(Oxidation); M5(Oxidation)               | #### | 0,001 | 0,01305 | 3,30 | 2 | #####     | 2,19  |
| M7(Oxidation)                              | #### | 0,001 | 0,0089  | 3,30 | 2 | #####     | -1,69 |
|                                            | #### | 0,001 | 0,00834 | 3,29 | 4 | #####     | -2,75 |
| M8(Oxidation)                              | #### | 0,001 | 0,05942 | 3,26 | 2 | #####     | -0,17 |
| C4(Carbamidomethyl)                        | #### | 0,001 | 0,02478 | 3,24 | 3 | #####     | 0,17  |
|                                            | #### | 0,001 | 0,0277  | 3,21 | 2 | #####     | -0,35 |
| X8(L)                                      | #### | 0,001 | 0,01625 | 3,17 | 2 | #####     | -0,90 |
|                                            | #### | 0,001 | 0,00604 | 3,17 | 2 | #####     | 1,15  |
| M10(Oxidation)                             | #### | 0,001 | 0,02749 | 3,17 | 2 | #####     | -3,03 |
| M14(Oxidation)                             | #### | 0,001 | 0,01074 | 3,15 | 3 | #####     | -0,80 |
|                                            | #### | 0,001 | 0,01033 | 3,11 | 3 | #####     | -0,06 |
|                                            | #### | 0,001 | 0,01175 | 3,10 | 2 | #####     | -0,24 |
|                                            | #### | 0,001 | 0,01144 | 3,10 | 2 | 851,42595 | 0,19  |
|                                            | #### | 0,001 | 0,03057 | 3,10 | 2 | #####     | -0,71 |
|                                            | #### | 0,001 | 0,02501 | 3,09 | 2 | #####     | -0,23 |
|                                            | #### | 0,001 | 0,00618 | 3,07 | 2 | #####     | 0,13  |
|                                            | #### | 0,001 | 0,0286  | 3,04 | 2 | 958,51097 | 0,46  |
|                                            | #### | 0,001 | 0,01126 | 3,03 | 2 | #####     | -2,27 |
|                                            | #### | 0,001 | 0,00612 | 3,03 | 2 | #####     | -0,75 |
|                                            | #### | 0,001 | 0,01312 | 3,03 | 2 | #####     | -0,07 |
| M8(Oxidation)                              | #### | 0,001 | 0,03323 | 3,02 | 2 | #####     | -0,32 |
| M3(Oxidation)                              | #### | 0,001 | 0,00821 | 3,02 | 2 | #####     | -1,52 |
|                                            | #### | 0,001 | 0,01138 | 3,01 | 2 | #####     | 3,86  |
| C6(Carbamidomethyl)                        | #### | 0,001 | 0,01093 | 2,99 | 2 | #####     | 0,10  |
|                                            | #### | 0,001 | 0,00725 | 2,98 | 3 | #####     | -0,77 |
|                                            | #### | 0,001 | 0,0331  | 2,97 | 3 | #####     | 0,63  |
|                                            | #### | 0,001 | 0,01624 | 2,96 | 2 | #####     | -1,23 |
|                                            | #### | 0,001 | 0,01499 | 2,92 | 3 | #####     | 0,93  |
|                                            | #### | 0,001 | 0,02396 | 2,92 | 2 | #####     | -1,00 |
|                                            | #### | 0,001 | 0,00695 | 2,92 | 2 | #####     | 0,27  |
| M4(Oxidation)                              | #### | 0,001 | 0,00716 | 2,91 | 3 | #####     | -1,46 |
|                                            | #### | 0,001 | 0,00987 | 2,91 | 2 | #####     | -0,33 |



|                                           |      |       |         |      |   |           |       |
|-------------------------------------------|------|-------|---------|------|---|-----------|-------|
|                                           | #### | 0,001 | 0,0864  | 2,89 | 2 | #####     | 5,54  |
|                                           | #### | 0,001 | 0,01452 | 2,89 | 2 | 901,47362 | -0,22 |
| C7(Carbamidomethyl); C14(Carbamidomethyl) | #### | 0,001 | 0,02101 | 2,88 | 2 | #####     | 2,33  |
|                                           | #### | 0,001 | 0,05586 | 2,88 | 2 | #####     | -0,37 |
|                                           | #### | 0,001 | 0,00711 | 2,88 | 2 | 976,45232 | -0,03 |
|                                           | #### | 0,001 | 0,01804 | 2,86 | 3 | #####     | 0,22  |
|                                           | #### | 0,001 | 0,02516 | 2,86 | 2 | #####     | -1,10 |
|                                           | #### | 0,001 | 0,02592 | 2,86 | 4 | #####     | -1,06 |
|                                           | #### | 0,001 | 0,01018 | 2,86 | 2 | #####     | -1,71 |
|                                           | #### | 0,001 | 0,02842 | 2,86 | 2 | 910,42546 | -1,17 |
|                                           | #### | 0,001 | 0,0065  | 2,86 | 2 | #####     | -0,54 |
|                                           | #### | 0,001 | 0,00972 | 2,82 | 2 | 871,46337 | 0,13  |
|                                           | #### | 0,001 | 0,02858 | 2,80 | 2 | 934,49913 | -0,19 |
|                                           | #### | 0,001 | 0,00691 | 2,80 | 2 | #####     | -1,48 |
|                                           | #### | 0,001 | 0,0249  | 2,79 | 2 | #####     | 0,62  |
|                                           | #### | 0,001 | 0,04789 | 2,77 | 2 | 906,54082 | 0,05  |
|                                           | #### | 0,001 | 0,0216  | 2,77 | 2 | #####     | 0,16  |
|                                           | #### | 0,001 | 0,03623 | 2,76 | 2 | #####     | -0,99 |
|                                           | #### | 0,001 | 0,072   | 2,74 | 2 | 816,45647 | -1,18 |
| M18(Oxidation); M23(Oxidation)            | #### | 0,001 | 0,07146 | 2,73 | 5 | #####     | 2,13  |
|                                           | #### | 0,001 | 0,04133 | 2,73 | 2 | 970,62981 | 0,21  |
| M6(Oxidation)                             | #### | 0,001 | 0,0837  | 2,73 | 2 | #####     | -0,54 |
|                                           | #### | 0,001 | 0,06833 | 2,72 | 2 | #####     | -0,89 |
| C8(Carbamidomethyl)                       | #### | 0,001 | 0,054   | 2,72 | 2 | #####     | -1,60 |
|                                           | #### | 0,001 | 0,0813  | 2,72 | 2 | 799,50237 | -1,61 |
|                                           | #### | 0,001 | 0,02199 | 2,72 | 2 | #####     | -0,11 |
|                                           | #### | 0,001 | 0,00637 | 2,70 | 3 | #####     | -2,42 |
| M4(Oxidation)                             | #### | 0,001 | 0,01088 | 2,69 | 2 | 835,39781 | -0,09 |
|                                           | #### | 0,001 | 0,00943 | 2,68 | 2 | 927,46410 | -0,24 |
|                                           | #### | 0,001 | 0,02269 | 2,68 | 2 | #####     | -0,03 |
|                                           | #### | 0,001 | 0,00887 | 2,68 | 2 | #####     | -0,31 |
|                                           | #### | 0,001 | 0,05579 | 2,68 | 3 | #####     | -2,70 |
|                                           | #### | 0,001 | 0,04344 | 2,67 | 2 | #####     | -0,22 |
|                                           | #### | 0,001 | 0,0189  | 2,66 | 2 | 939,55095 | -0,06 |
|                                           | #### | 0,001 | 0,02939 | 2,66 | 2 | 917,53081 | 0,59  |
|                                           | #### | 0,001 | 0,03725 | 2,64 | 2 | 865,40520 | 0,16  |
|                                           | #### | 0,001 | 0,01315 | 2,64 | 2 | #####     | -0,73 |
|                                           | #### | 0,001 | 0,01053 | 2,63 | 2 | #####     | 1,50  |
|                                           | #### | 0,001 | 0,01395 | 2,63 | 2 | #####     | -0,67 |
|                                           | #### | 0,001 | 0,01742 | 2,61 | 3 | #####     | 3,71  |
|                                           | #### | 0,001 | 0,01029 | 2,60 | 2 | 875,49443 | -0,14 |
|                                           | #### | 0,001 | 0,01729 | 2,59 | 2 | 964,44573 | -2,70 |
|                                           | #### | 0,001 | 0,03934 | 2,59 | 2 | #####     | -2,57 |
| C5(Carbamidomethyl)                       | #### | 0,001 | 0,03973 | 2,59 | 2 | #####     | 0,30  |
|                                           | #### | 0,001 | 0,05245 | 2,58 | 2 | 812,49822 | -0,86 |
| M4(Oxidation)                             | #### | 0,001 | 0,01043 | 2,58 | 2 | #####     | 0,26  |
|                                           | #### | 0,001 | 0,01723 | 2,57 | 2 | 871,50041 | 0,90  |
|                                           | #### | 0,001 | 0,08023 | 2,55 | 2 | #####     | 0,83  |
|                                           | #### | 0,001 | 0,01949 | 2,51 | 2 | 824,42455 | -1,92 |
|                                           | #### | 0,001 | 0,05318 | 2,50 | 3 | #####     | -0,97 |
|                                           | #### | 0,001 | 0,02138 | 2,50 | 3 | #####     | -0,84 |
|                                           | #### | 0,001 | 0,03948 | 2,49 | 2 | #####     | -0,42 |
|                                           | #### | 0,001 | 0,0239  | 2,48 | 2 | 932,47905 | -0,61 |
| M5(Oxidation)                             | #### | 0,001 | 0,03674 | 2,47 | 3 | #####     | -1,18 |
|                                           | #### | 0,001 | 0,04236 | 2,46 | 2 | 883,44652 | 0,43  |
|                                           | #### | 0,001 | 0,0206  | 2,46 | 2 | #####     | -0,37 |
|                                           | #### | 0,001 | 0,01927 | 2,45 | 3 | #####     | -0,19 |
|                                           | #### | 0,001 | 0,07533 | 2,45 | 2 | #####     | 0,96  |
|                                           | #### | 0,001 | 0,02093 | 2,44 | 2 | #####     | -0,06 |

|                     |      |       |         |      |   |           |       |
|---------------------|------|-------|---------|------|---|-----------|-------|
|                     | #### | 0,001 | 0,01091 | 2,43 | 4 | #####     | 0,63  |
|                     | #### | 0,001 | 0,0303  | 2,43 | 2 | #####     | -2,37 |
|                     | #### | 0,001 | 0,05184 | 2,43 | 2 | 833,41472 | -0,61 |
|                     | #### | 0,001 | 0,00812 | 2,43 | 2 | 828,49352 | -0,37 |
|                     | #### | 0,001 | 0,03489 | 2,41 | 2 | #####     | -1,56 |
|                     | #### | 0,001 | 0,04178 | 2,39 | 2 | 896,49529 | 0,45  |
|                     | #### | 0,001 | 0,01135 | 2,39 | 2 | 819,40105 | -2,35 |
|                     | #### | 0,001 | 0,01462 | 2,38 | 2 | 877,47728 | -0,64 |
|                     | #### | 0,001 | 0,07336 | 2,37 | 2 | #####     | -1,87 |
|                     | #### | 0,001 | 0,02296 | 2,37 | 2 | 882,51561 | 0,00  |
|                     | #### | 0,001 | 0,01881 | 2,36 | 2 | #####     | 0,14  |
|                     | #### | 0,001 | 0,04103 | 2,36 | 2 | #####     | 0,97  |
| M3(Oxidation)       | #### | 0,001 | 0,00721 | 2,34 | 3 | #####     | 0,21  |
|                     | #### | 0,001 | 0,03632 | 2,34 | 2 | 962,59172 | -0,42 |
| C3(Carbamidomethyl) | #### | 0,001 | 0,02016 | 2,34 | 3 | #####     | 0,64  |
|                     | #### | 0,001 | 0,03446 | 2,34 | 2 | #####     | -0,38 |
|                     | #### | 0,001 | 0,01154 | 2,34 | 2 | #####     | -0,76 |
| M5(Oxidation)       | #### | 0,001 | 0,0662  | 2,33 | 3 | #####     | 0,87  |
|                     | #### | 0,001 | 0,03278 | 2,32 | 2 | 857,45152 | -0,09 |
| C8(Carbamidomethyl) | #### | 0,001 | 0,05282 | 2,30 | 2 | 912,42473 | 0,35  |
|                     | #### | 0,001 | 0,06706 | 2,30 | 2 | 929,53075 | 0,51  |
|                     | #### | 0,001 | 0,01115 | 2,30 | 2 | 867,45683 | -0,28 |
|                     | #### | 0,001 | 0,06525 | 2,29 | 2 | 824,45213 | 1,05  |
|                     | #### | 0,001 | 0,04558 | 2,29 | 2 | 836,43065 | 0,60  |
|                     | #### | 0,001 | 0,07936 | 2,28 | 3 | #####     | -0,85 |
| C2(Carbamidomethyl) | #### | 0,001 | 0,03002 | 2,27 | 2 | 868,39665 | -1,79 |
| M7(Oxidation)       | #### | 0,001 | 0,00737 | 2,25 | 2 | 834,47557 | 0,20  |
|                     | #### | 0,001 | 0,02143 | 2,24 | 2 | 989,58745 | -0,33 |
| M2(Oxidation)       | #### | 0,001 | 0,08084 | 2,23 | 2 | 875,43273 | -0,53 |
|                     | #### | 0,001 | 0,01637 | 2,17 | 3 | #####     | 0,12  |
|                     | #### | 0,001 | 0,04921 | 2,15 | 2 | 887,49455 | -0,01 |
| C4(Carbamidomethyl) | #### | 0,001 | 0,0793  | 2,15 | 2 | 828,40288 | -0,49 |
|                     | #### | 0,001 | 0,01348 | 2,13 | 2 | 835,49193 | -0,59 |
|                     | #### | 0,001 | 0,0362  | 2,13 | 2 | 858,50420 | -0,21 |
| M2(Oxidation)       | #### | 0,001 | 0,06397 | 2,11 | 2 | 879,39794 | -1,15 |
|                     | #### | 0,001 | 0,07963 | 2,08 | 2 | #####     | -2,33 |
| C6(Carbamidomethyl) | #### | 0,001 | 0,08383 | 2,07 | 2 | 946,43401 | 0,11  |
|                     | #### | 0,001 | 0,03053 | 2,06 | 2 | #####     | -0,91 |
|                     | #### | 0,001 | 0,00824 | 2,04 | 3 | #####     | -0,77 |
| M4(Oxidation)       | #### | 0,001 | 0,06778 | 2,04 | 3 | #####     | -0,30 |
| C2(Carbamidomethyl) | #### | 0,001 | 0,07841 | 2,04 | 2 | 911,40465 | 0,71  |
|                     | #### | 0,001 | 0,06286 | 2,03 | 2 | #####     | -0,47 |
|                     | #### | 0,001 | 0,00612 | 1,99 | 2 | #####     | -1,61 |
|                     | #### | 0,001 | 0,02476 | 1,97 | 2 | 824,41478 | -0,13 |
|                     | #### | 0,001 | 0,02241 | 1,93 | 2 | 902,44768 | -0,28 |
|                     | #### | 0,001 | 0,07029 | 1,91 | 2 | 821,47563 | -1,37 |
|                     | #### | 0,001 | 0,01131 | 1,90 | 2 | 961,51000 | -0,21 |
| M5(Oxidation)       | #### | 0,001 | 0,07125 | 1,88 | 2 | 879,41026 | -2,96 |
|                     | #### | 0,001 | 0,05187 | 1,86 | 2 | #####     | -0,28 |
|                     | #### | 0,001 | 0,0164  | 1,86 | 2 | 859,43828 | 0,01  |
|                     | #### | 0,001 | 0,06383 | 1,85 | 3 | #####     | 0,63  |
|                     | #### | 0,001 | 0,08758 | 1,80 | 2 | 887,42577 | -0,02 |
|                     | #### | 0,001 | 0,02414 | 1,75 | 2 | 912,49364 | -0,18 |
|                     | #### | 0,001 | 0,07713 | 1,74 | 3 | #####     | 1,63  |
|                     | #### | 0,001 | 0,00845 | 1,73 | 3 | #####     | 0,18  |
|                     | #### | 0,001 | 0,05158 | 1,72 | 3 | #####     | -0,84 |
|                     | #### | 0,001 | 0,06445 | 1,71 | 3 | #####     | -1,22 |
| M2(Oxidation)       | #### | 0,001 | 0,08659 | 1,64 | 2 | #####     | -1,03 |
|                     | #### | 0,001 | 0,07044 | 1,30 | 4 | #####     | -1,17 |

|                                      |      |       |         |      |   |           |       |
|--------------------------------------|------|-------|---------|------|---|-----------|-------|
|                                      | #### | 0,001 | 0,0071  | 1,26 | 3 | #####     | 0,23  |
|                                      | #### | 0,002 | 0,09464 | 2,80 | 2 | 948,47386 | -0,73 |
| M7(Oxidation)                        | #### | 0,002 | 0,09095 | 2,78 | 2 | #####     | 0,21  |
| M4(Oxidation)                        | #### | 0,002 | 0,09467 | 2,52 | 3 | #####     | -0,45 |
| M3(Oxidation)                        | #### | 0,002 | 0,09151 | 2,36 | 2 | 864,42418 | -0,30 |
|                                      | #### | 0,002 | 0,09547 | 2,33 | 2 | 931,58202 | -0,30 |
| C1(Carbamidomethyl)                  | #### | 0,002 | 0,09561 | 2,07 | 2 | 856,38671 | -0,29 |
|                                      | #### | 0,002 | 0,09583 | 1,63 | 2 | 822,38939 | 0,10  |
|                                      | #### | 0,002 | 0,08821 | 1,60 | 2 | 985,59319 | 0,32  |
|                                      | #### | 0,002 | 0,09455 | 0,95 | 3 | #####     | -2,25 |
| M22(Oxidation)                       | #### | 0,003 | 0,1363  | 3,27 | 3 | #####     | -0,59 |
|                                      | #### | 0,003 | 0,1368  | 3,06 | 2 | #####     | -1,82 |
|                                      | #### | 0,003 | 0,1043  | 2,93 | 2 | #####     | -0,58 |
|                                      | #### | 0,003 | 0,1015  | 2,77 | 2 | 973,50658 | 0,41  |
|                                      | #### | 0,003 | 0,1165  | 2,64 | 2 | #####     | -2,28 |
|                                      | #### | 0,003 | 0,1424  | 2,64 | 3 | #####     | -0,38 |
|                                      | #### | 0,003 | 0,1222  | 2,57 | 2 | 999,55815 | -0,06 |
| C9(Carbamidomethyl); M10(Oxidation)  | #### | 0,003 | 0,1239  | 2,55 | 3 | #####     | -1,37 |
|                                      | #### | 0,003 | 0,142   | 2,53 | 2 | #####     | -0,01 |
| M6(Oxidation)                        | #### | 0,003 | 0,1048  | 2,45 | 2 | #####     | -1,24 |
|                                      | #### | 0,003 | 0,1183  | 2,33 | 2 | 988,46068 | -1,57 |
|                                      | #### | 0,003 | 0,1363  | 2,30 | 2 | 991,50511 | -0,39 |
|                                      | #### | 0,003 | 0,1137  | 2,30 | 2 | 870,50359 | -0,92 |
| M1(Oxidation)                        | #### | 0,003 | 0,1074  | 2,29 | 2 | 963,49437 | 1,57  |
|                                      | #### | 0,003 | 0,1227  | 2,21 | 2 | 929,53075 | 0,51  |
|                                      | #### | 0,003 | 0,1313  | 2,17 | 3 | #####     | -0,09 |
|                                      | #### | 0,003 | 0,1234  | 2,10 | 2 | 906,49297 | -0,20 |
|                                      | #### | 0,003 | 0,1325  | 2,09 | 3 | #####     | -0,60 |
| M3(Oxidation)                        | #### | 0,004 | 0,1566  | 2,95 | 2 | #####     | -0,26 |
|                                      | #### | 0,004 | 0,1545  | 2,81 | 2 | #####     | -0,04 |
|                                      | #### | 0,004 | 0,1608  | 2,81 | 2 | #####     | -1,28 |
|                                      | #### | 0,004 | 0,1442  | 2,62 | 2 | #####     | -0,41 |
|                                      | #### | 0,004 | 0,1482  | 2,42 | 3 | #####     | 0,30  |
|                                      | #### | 0,004 | 0,1598  | 2,41 | 2 | #####     | -0,66 |
|                                      | #### | 0,004 | 0,1558  | 2,29 | 2 | #####     | 0,90  |
|                                      | #### | 0,004 | 0,1556  | 2,27 | 3 | #####     | 1,06  |
| M11(Oxidation); M13(Oxidation)       | #### | 0,004 | 0,1581  | 2,17 | 3 | #####     | -1,18 |
|                                      | #### | 0,004 | 0,1611  | 2,09 | 2 | 960,47667 | -1,97 |
|                                      | #### | 0,004 | 0,1485  | 2,04 | 2 | 862,44115 | -0,73 |
| C20(Carbamidomethyl)                 | #### | 0,005 | 0,1643  | 2,34 | 2 | #####     | 0,20  |
|                                      | #### | 0,005 | 0,1654  | 2,19 | 2 | 875,52983 | -1,25 |
|                                      | #### | 0,006 | 0,1763  | 3,24 | 2 | #####     | 0,70  |
|                                      | #### | 0,006 | 0,1755  | 2,83 | 2 | #####     | 0,31  |
|                                      | #### | 0,006 | 0,1791  | 2,70 | 2 | #####     | -1,43 |
|                                      | #### | 0,006 | 0,1746  | 2,65 | 2 | 807,43505 | -1,15 |
|                                      | #### | 0,006 | 0,1743  | 2,23 | 2 | #####     | -0,04 |
|                                      | #### | 0,006 | 0,1939  | 2,10 | 2 | 816,48216 | -0,52 |
| M16(Oxidation); C22(Carbamidomethyl) | #### | 0,006 | 0,1822  | 1,25 | 4 | #####     | 1,56  |
| M15(Oxidation)                       | #### | 0,007 | 0,1993  | 3,24 | 3 | #####     | -6,53 |
|                                      | #### | 0,007 | 0,212   | 2,97 | 2 | #####     | -2,27 |
|                                      | #### | 0,007 | 0,2115  | 2,68 | 2 | 997,51018 | 0,00  |
|                                      | #### | 0,007 | 0,2072  | 2,38 | 2 | #####     | 0,64  |
|                                      | #### | 0,007 | 0,2136  | 2,31 | 2 | #####     | 0,67  |
|                                      | #### | 0,007 | 0,1987  | 2,07 | 4 | #####     | 0,37  |
|                                      | #### | 0,007 | 0,2171  | 1,99 | 3 | #####     | -1,23 |
| M2(Oxidation)                        | #### | 0,007 | 0,2017  | 1,91 | 2 | 823,41240 | -0,89 |
|                                      | #### | 0,007 | 0,2078  | 1,30 | 3 | #####     | -1,15 |
| M5(Oxidation)                        | #### | 0,008 | 0,2252  | 2,82 | 3 | #####     | -0,25 |
|                                      | #### | 0,008 | 0,2267  | 2,71 | 2 | 911,42278 | 1,09  |

|                     |      |       |        |      |   |           |       |
|---------------------|------|-------|--------|------|---|-----------|-------|
|                     | #### | 0,008 | 0,2282 | 2,60 | 2 | #####     | 1,35  |
|                     | #### | 0,008 | 0,2238 | 2,06 | 2 | #####     | -0,70 |
|                     | #### | 0,008 | 0,2299 | 2,00 | 2 | 843,42497 | 5,04  |
|                     | #### | 0,009 | 0,2474 | 3,18 | 3 | #####     | -0,66 |
|                     | #### | 0,009 | 0,2352 | 2,95 | 2 | #####     | 1,22  |
|                     | #### | 0,009 | 0,2456 | 2,49 | 2 | 980,52635 | -0,94 |
|                     | #### | 0,009 | 0,2375 | 2,46 | 3 | #####     | -0,03 |
|                     | #### | 0,009 | 0,2429 | 2,09 | 2 | 948,48937 | -0,45 |
|                     | #### | 0,009 | 0,2557 | 1,79 | 2 | 801,39897 | -1,58 |
| C7(Carbamidomethyl) | #### | 0,009 | 0,2557 | 0,24 | 2 | #####     | -5,47 |

| RT [min] | # Missed Cleavages |
|----------|--------------------|
|          |                    |
| 62,36    | 0                  |
| 65,58    | 0                  |
| 56,57    | 0                  |
| 50,84    | 1                  |
| 63,77    | 0                  |
| 74,71    | 0                  |
| 70,27    | 0                  |
| 57,44    | 0                  |
| 71,38    | 0                  |
| 83,14    | 0                  |
| 75,34    | 0                  |
| 71,83    | 0                  |
| 61,94    | 1                  |
| 65,12    | 0                  |
| 47,87    | 0                  |
| 77,12    | 0                  |
| 67,66    | 0                  |
| 59,34    | 0                  |
| 64,54    | 0                  |
| 71,30    | 0                  |
| 65,63    | 0                  |
| 63,09    | 0                  |
| 65,05    | 0                  |
| 59,46    | 0                  |
| 63,94    | 0                  |
| 64,48    | 0                  |
| 56,81    | 0                  |
| 67,27    | 1                  |
| 65,49    | 0                  |
| 63,50    | 0                  |
| 79,10    | 0                  |
| 49,45    | 0                  |
| 63,12    | 0                  |
| 47,32    | 0                  |
| 59,19    | 1                  |
| 71,36    | 0                  |
| 64,36    | 0                  |
| 60,24    | 0                  |
| 60,16    | 0                  |
| 63,09    | 0                  |
| 81,31    | 0                  |
| 82,81    | 0                  |
| 60,89    | 0                  |
| 40,74    | 0                  |
| 69,38    | 0                  |
| 67,66    | 0                  |
| 71,87    | 0                  |
| 71,28    | 0                  |
| 55,57    | 0                  |
| 62,80    | 0                  |
| 52,17    | 0                  |
| 69,54    | 0                  |
| 61,82    | 0                  |
| 45,04    | 0                  |
| 48,78    | 0                  |

|       |   |
|-------|---|
| 78,45 | 0 |
| 67,59 | 0 |
| 52,29 | 0 |
| 63,84 | 0 |
| 57,60 | 0 |
| 59,52 | 1 |
| 57,21 | 0 |
| 59,47 | 0 |
| 64,66 | 0 |
| 70,34 | 0 |
| 65,42 | 0 |
| 52,85 | 0 |
| 64,03 | 0 |
| 58,74 | 0 |
| 57,60 | 1 |
| 76,46 | 0 |
| 65,31 | 0 |
| 59,12 | 0 |
| 68,44 | 0 |
| 63,42 | 0 |
| 57,40 | 1 |
| 56,81 | 0 |
| 63,58 | 0 |
| 55,08 | 0 |
| 66,28 | 0 |
| 38,41 | 0 |
| 62,32 | 0 |
| 68,21 | 0 |
| 47,88 | 1 |
| 76,58 | 1 |
| 52,20 | 0 |
| 65,64 | 0 |
| 78,25 | 0 |
| 66,24 | 0 |
| 58,07 | 0 |
| 61,83 | 0 |
| 51,73 | 0 |
| 61,59 | 0 |
| 46,69 | 0 |
| 75,34 | 0 |
| 55,67 | 0 |
| 70,83 | 0 |
| 75,88 | 0 |
| 48,44 | 1 |
| 52,03 | 0 |
| 45,70 | 0 |
| 57,33 | 0 |
| 52,41 | 0 |
| 52,27 | 1 |
| 76,97 | 0 |
| 71,51 | 0 |
| 61,79 | 0 |
| 53,17 | 0 |
| 58,27 | 0 |
| 50,37 | 0 |
| 75,86 | 0 |
| 70,22 | 0 |
| 60,87 | 0 |
| 58,08 | 0 |

|       |   |
|-------|---|
| 65,02 | 0 |
| 55,27 | 0 |
| 49,21 | 0 |
| 38,20 | 0 |
| 69,90 | 0 |
| 69,23 | 1 |
| 64,20 | 1 |
| 56,99 | 1 |
| 51,54 | 0 |
| 46,99 | 0 |
| 34,60 | 0 |
| 55,03 | 0 |
| 60,55 | 0 |
| 70,44 | 0 |
| 24,00 | 1 |
| 70,85 | 0 |
| 53,13 | 0 |
| 61,25 | 0 |
| 63,25 | 0 |
| 62,34 | 0 |
| 63,92 | 0 |
| 48,47 | 0 |
| 62,78 | 0 |
| 54,35 | 1 |
| 71,03 | 0 |
| 46,54 | 0 |
| 73,62 | 0 |
| 69,05 | 0 |
| 58,14 | 0 |
| 67,68 | 0 |
| 51,58 | 0 |
| 74,10 | 0 |
| 71,81 | 0 |
| 71,01 | 0 |
| 61,36 | 0 |
| 59,50 | 0 |
| 63,68 | 0 |
| 58,37 | 0 |
| 55,18 | 0 |
| 52,35 | 0 |
| 67,72 | 0 |
| 69,78 | 0 |
| 51,33 | 0 |
| 69,32 | 0 |
| 70,85 | 0 |
| 60,36 | 0 |
| 52,43 | 1 |
| 50,95 | 1 |
| 85,60 | 0 |
| 65,91 | 0 |
| 38,96 | 1 |
| 47,61 | 0 |
| 54,14 | 0 |
| 87,10 | 0 |
| 72,13 | 0 |
| 49,76 | 0 |
| 62,24 | 0 |
| 75,57 | 0 |
| 72,02 | 0 |

|       |   |
|-------|---|
| 67,34 | 0 |
| 77,89 | 0 |
| 65,24 | 0 |
| 65,97 | 1 |
| 41,65 | 0 |
| 71,17 | 0 |
| 49,95 | 2 |
| 54,71 | 0 |
| 70,49 | 0 |
| 63,27 | 0 |
| 57,91 | 0 |
| 57,37 | 0 |
| 61,26 | 0 |
| 56,14 | 0 |
| 38,85 | 1 |
| 59,48 | 0 |
| 70,65 | 0 |
| 59,66 | 0 |
| 61,53 | 0 |
| 60,95 | 0 |
| 64,65 | 0 |
| 73,77 | 0 |
| 45,16 | 0 |
| 75,80 | 0 |
| 51,46 | 0 |
| 86,16 | 0 |
| 66,24 | 0 |
| 67,42 | 0 |
| 51,68 | 1 |
| 66,96 | 0 |
| 70,64 | 0 |
| 75,88 | 0 |
| 65,21 | 0 |
| 83,87 | 0 |
| 64,13 | 0 |
| 70,00 | 0 |
| 47,13 | 1 |
| 75,40 | 0 |
| 57,96 | 0 |
| 61,94 | 0 |
| 51,10 | 0 |
| 52,20 | 0 |
| 60,24 | 0 |
| 65,65 | 0 |
| 74,10 | 0 |
| 61,68 | 0 |
| 44,65 | 0 |
| 85,52 | 0 |
| 57,73 | 0 |
| 64,85 | 0 |
| 46,58 | 0 |
| 55,69 | 0 |
| 56,47 | 0 |
| 68,75 | 0 |
| 56,87 | 0 |
| 30,10 | 0 |
| 61,06 | 0 |
| 58,79 | 0 |
| 55,22 | 0 |



|       |   |
|-------|---|
| 52,53 | 0 |
| 37,56 | 1 |
| 69,17 | 0 |
| 55,05 | 1 |
| 63,68 | 1 |
| 73,47 | 0 |
| 83,04 | 0 |
| 69,19 | 0 |
| 44,76 | 0 |
| 54,08 | 0 |
| 62,21 | 0 |
| 53,50 | 0 |
| 51,09 | 0 |
| 43,66 | 0 |
| 46,25 | 1 |
| 74,27 | 0 |
| 58,66 | 0 |
| 71,82 | 0 |
| 63,64 | 0 |
| 53,13 | 0 |
| 57,03 | 0 |
| 40,37 | 1 |
| 62,61 | 0 |
| 28,54 | 0 |
| 64,99 | 0 |
| 63,58 | 0 |
| 48,78 | 0 |
| 68,88 | 1 |
| 69,65 | 0 |
| 61,44 | 0 |
| 54,68 | 0 |
| 72,58 | 0 |
| 65,53 | 0 |
| 65,04 | 0 |
| 68,33 | 0 |
| 61,30 | 1 |
| 47,81 | 0 |
| 69,66 | 0 |
| 80,98 | 0 |
| 76,37 | 0 |
| 43,86 | 0 |
| 54,64 | 0 |
| 53,14 | 0 |
| 77,56 | 0 |
| 80,68 | 0 |
| 67,14 | 0 |
| 68,64 | 0 |
| 69,01 | 0 |
| 63,72 | 0 |
| 67,39 | 0 |
| 53,10 | 0 |
| 55,03 | 0 |
| 74,82 | 0 |
| 59,41 | 0 |
| 56,04 | 0 |
| 59,43 | 0 |
| 67,18 | 0 |
| 68,79 | 0 |
| 76,22 | 0 |

|       |   |
|-------|---|
| 48,04 | 0 |
| 58,93 | 1 |
| 57,29 | 0 |
| 56,57 | 0 |
| 52,96 | 0 |
| 58,67 | 0 |
| 61,07 | 0 |
| 60,31 | 0 |
| 54,39 | 1 |
| 48,98 | 0 |
| 35,54 | 0 |
| 71,52 | 1 |
| 62,84 | 1 |
| 49,39 | 0 |
| 64,74 | 1 |
| 55,57 | 0 |
| 59,53 | 0 |
| 71,29 | 0 |
| 46,01 | 0 |
| 51,27 | 0 |
| 52,24 | 0 |
| 60,57 | 0 |
| 46,38 | 0 |
| 85,03 | 0 |
| 55,05 | 0 |
| 41,37 | 0 |
| 81,00 | 0 |
| 62,16 | 0 |
| 40,97 | 0 |
| 60,16 | 0 |
| 65,47 | 0 |
| 35,44 | 0 |
| 70,45 | 0 |
| 74,77 | 0 |
| 54,75 | 0 |
| 31,69 | 0 |
| 42,01 | 0 |
| 41,99 | 0 |
| 42,34 | 0 |
| 77,14 | 0 |
| 47,99 | 0 |
| 42,62 | 0 |
| 81,08 | 0 |
| 80,89 | 0 |
| 57,81 | 0 |
| 67,19 | 0 |
| 64,96 | 0 |
| 48,43 | 0 |
| 69,72 | 0 |
| 70,17 | 0 |
| 42,50 | 0 |
| 65,63 | 0 |
| 50,17 | 1 |
| 65,20 | 0 |
| 40,27 | 0 |
| 48,12 | 0 |
| 59,79 | 0 |
| 76,85 | 0 |
| 72,15 | 0 |

|       |   |
|-------|---|
| 51,86 | 1 |
| 45,79 | 0 |
| 42,21 | 0 |
| 63,50 | 0 |
| 64,77 | 0 |
| 45,96 | 0 |
| 61,24 | 0 |
| 53,91 | 0 |
| 34,51 | 0 |
| 52,37 | 0 |
| 44,80 | 0 |
| 44,21 | 0 |
| 52,92 | 0 |
| 76,71 | 0 |
| 37,70 | 0 |
| 71,85 | 1 |
| 33,49 | 0 |
| 46,57 | 0 |
| 43,94 | 0 |
| 62,00 | 0 |
| 35,78 | 0 |
| 48,50 | 0 |
| 55,56 | 0 |
| 57,39 | 0 |
| 44,64 | 0 |
| 70,80 | 0 |
| 52,21 | 0 |
| 67,88 | 0 |
| 68,58 | 0 |
| 66,00 | 0 |
| 72,77 | 0 |
| 41,06 | 1 |
| 89,23 | 0 |
| 51,71 | 1 |
| 63,77 | 1 |
| 61,47 | 0 |
| 60,30 | 0 |
| 67,70 | 0 |
| 59,47 | 0 |
| 58,49 | 0 |
| 64,09 | 0 |
| 71,84 | 0 |
| 46,56 | 0 |
| 51,51 | 0 |
| 82,18 | 0 |
| 36,10 | 0 |
| 50,73 | 0 |
| 30,27 | 0 |
| 30,20 | 0 |
| 65,95 | 0 |
| 49,00 | 0 |
| 76,63 | 0 |
| 72,64 | 0 |
| 65,47 | 0 |
| 47,04 | 0 |
| 52,82 | 0 |
| 68,62 | 0 |
| 62,72 | 0 |
| 43,17 | 0 |

|       |   |
|-------|---|
| 43,65 | 1 |
| 51,92 | 0 |
| 36,73 | 0 |
| 59,69 | 0 |
| 61,05 | 0 |
| 59,63 | 0 |
| 39,59 | 0 |
| 65,70 | 0 |
| 46,62 | 0 |
| 44,16 | 0 |
| 47,25 | 0 |
| 57,40 | 1 |
| 73,32 | 0 |
| 49,59 | 0 |
| 81,03 | 1 |
| 74,58 | 0 |
| 46,49 | 0 |
| 40,24 | 0 |
| 45,95 | 0 |
| 58,44 | 1 |
| 58,56 | 0 |
| 52,59 | 0 |
| 63,62 | 0 |
| 57,00 | 0 |
| 29,95 | 0 |
| 60,01 | 0 |
| 44,92 | 0 |
| 57,96 | 0 |
| 29,56 | 1 |
| 46,37 | 0 |
| 81,80 | 0 |
| 44,14 | 0 |
| 59,75 | 0 |
| 37,46 | 0 |
| 71,62 | 0 |
| 82,38 | 0 |
| 27,75 | 0 |
| 48,36 | 0 |
| 70,13 | 0 |
| 37,84 | 0 |
| 35,74 | 0 |
| 41,18 | 0 |
| 81,16 | 0 |
| 56,87 | 0 |
| 65,46 | 0 |
| 40,27 | 0 |
| 73,33 | 0 |
| 41,68 | 0 |
| 53,50 | 0 |
| 60,97 | 0 |
| 69,04 | 0 |
| 71,21 | 0 |
| 46,97 | 0 |
| 33,91 | 0 |
| 28,42 | 0 |
| 52,57 | 0 |
| 52,26 | 1 |
| 60,16 | 0 |
| 57,53 | 1 |

|       |   |
|-------|---|
| 66,55 | 0 |
| 39,80 | 0 |
| 33,43 | 1 |
| 39,62 | 0 |
| 46,77 | 0 |
| 56,73 | 0 |
| 57,68 | 0 |
| 57,57 | 0 |
| 71,96 | 0 |
| 40,92 | 0 |
| 81,21 | 0 |
| 50,74 | 0 |
| 57,94 | 0 |
| 55,53 | 0 |
| 61,00 | 1 |
| 56,19 | 0 |
| 39,37 | 0 |
| 47,72 | 0 |
| 66,32 | 0 |
| 41,61 | 0 |
| 56,43 | 0 |
| 50,44 | 0 |
| 62,72 | 0 |
| 47,02 | 0 |
| 78,36 | 0 |
| 75,52 | 0 |
| 70,94 | 0 |
| 38,30 | 0 |
| 55,19 | 0 |
| 45,92 | 0 |
| 63,32 | 0 |
| 77,13 | 0 |
| 55,23 | 0 |
| 51,59 | 0 |
| 49,89 | 0 |
| 48,81 | 0 |
| 63,46 | 0 |
| 38,89 | 0 |
| 55,44 | 0 |
| 35,38 | 0 |
| 61,35 | 1 |
| 43,59 | 0 |
| 53,35 | 1 |
| 54,96 | 0 |
| 33,37 | 0 |
| 54,89 | 1 |
| 41,76 | 0 |
| 80,40 | 0 |
| 53,36 | 0 |
| 45,50 | 0 |
| 80,79 | 0 |
| 26,10 | 0 |
| 41,82 | 0 |
| 40,02 | 0 |
| 55,89 | 0 |
| 46,63 | 0 |
| 61,00 | 0 |
| 55,78 | 1 |
| 51,05 | 0 |

|       |   |
|-------|---|
| 50,14 | 0 |
| 39,23 | 0 |
| 38,31 | 0 |
| 38,62 | 0 |
| 25,62 | 0 |
| 45,30 | 0 |
| 71,96 | 0 |
| 59,82 | 0 |
| 47,49 | 0 |
| 43,45 | 0 |
| 74,83 | 0 |
| 55,63 | 0 |
| 28,46 | 0 |
| 75,09 | 0 |
| 55,00 | 0 |
| 42,97 | 0 |
| 44,63 | 0 |
| 69,89 | 0 |
| 50,07 | 0 |
| 40,19 | 1 |
| 38,57 | 0 |
| 77,65 | 0 |
| 30,55 | 0 |
| 44,84 | 0 |
| 39,86 | 0 |
| 49,18 | 0 |
| 49,51 | 0 |
| 25,88 | 0 |
| 45,71 | 0 |
| 27,99 | 0 |
| 42,36 | 0 |
| 82,69 | 0 |
| 68,69 | 0 |
| 72,72 | 0 |
| 57,34 | 0 |
| 58,18 | 0 |
| 56,88 | 0 |
| 59,55 | 0 |
| 50,45 | 0 |
| 42,43 | 0 |
| 58,78 | 0 |
| 49,91 | 0 |
| 48,10 | 0 |
| 38,34 | 0 |
| 76,54 | 0 |
| 47,61 | 0 |
| 65,71 | 0 |
| 48,16 | 1 |
| 44,87 | 0 |
| 41,06 | 0 |
| 61,54 | 0 |
| 50,97 | 0 |
| 44,59 | 0 |
| 42,25 | 0 |
| 49,16 | 0 |
| 46,07 | 0 |
| 46,36 | 0 |
| 26,37 | 0 |
| 53,36 | 1 |

|       |   |
|-------|---|
| 45,48 | 0 |
| 30,51 | 0 |
| 40,86 | 0 |
| 53,20 | 0 |
| 55,13 | 0 |
| 54,97 | 0 |
| 40,77 | 0 |
| 58,42 | 0 |
| 65,08 | 0 |
| 40,34 | 0 |
| 28,05 | 0 |
| 78,07 | 0 |
| 37,42 | 0 |
| 47,78 | 0 |
| 37,55 | 0 |
| 39,46 | 0 |
| 35,97 | 0 |
| 46,88 | 0 |
| 71,23 | 0 |
| 55,11 | 0 |
| 65,77 | 0 |
| 72,55 | 0 |
| 52,58 | 0 |
| 49,99 | 0 |
| 72,97 | 0 |
| 53,35 | 0 |
| 42,67 | 0 |
| 59,78 | 0 |
| 28,11 | 0 |
| 60,08 | 0 |
| 74,43 | 0 |
| 73,07 | 0 |
| 49,22 | 0 |
| 39,71 | 0 |
| 38,84 | 0 |
| 53,04 | 0 |
| 60,78 | 0 |
| 45,08 | 0 |
| 61,83 | 0 |
| 63,63 | 0 |
| 81,26 | 0 |
| 52,16 | 0 |
| 54,85 | 1 |
| 59,13 | 0 |
| 51,95 | 0 |
| 34,79 | 0 |
| 59,61 | 0 |
| 53,32 | 0 |
| 30,63 | 0 |
| 70,30 | 0 |
| 55,25 | 0 |
| 54,63 | 0 |
| 30,32 | 0 |
| 48,39 | 0 |
| 29,76 | 0 |
| 71,35 | 0 |
| 54,96 | 0 |
| 48,06 | 0 |
| 63,39 | 0 |

|       |   |
|-------|---|
| 53,39 | 0 |
| 32,52 | 0 |
| 46,19 | 0 |
| 50,38 | 0 |
| 61,60 | 0 |
| 47,49 | 0 |
| 58,89 | 0 |
| 49,48 | 0 |
| 33,73 | 0 |
| 33,38 | 0 |
| 38,61 | 0 |
| 46,97 | 0 |
| 44,44 | 0 |
| 61,02 | 0 |
| 47,21 | 0 |
| 47,99 | 0 |
| 61,52 | 0 |
| 58,25 | 0 |
| 35,13 | 1 |
| 48,83 | 0 |
| 49,96 | 0 |
| 39,74 | 0 |
| 58,06 | 0 |
| 49,44 | 0 |
| 64,00 | 1 |
| 33,88 | 0 |
| 53,73 | 0 |
| 50,66 | 2 |
| 60,56 | 0 |
| 42,43 | 0 |
| 45,74 | 0 |
| 65,59 | 0 |
| 45,54 | 1 |
| 37,29 | 1 |
| 57,30 | 0 |
| 39,53 | 1 |
| 37,35 | 0 |
| 47,62 | 0 |
| 55,63 | 1 |
| 57,10 | 0 |
| 40,04 | 0 |
| 62,85 | 0 |
| 74,18 | 0 |
| 61,55 | 0 |
| 18,66 | 0 |
| 68,85 | 0 |
| 60,53 | 0 |
| 19,12 | 0 |
| 42,96 | 0 |
| 56,82 | 0 |
| 48,50 | 0 |
| 61,25 | 0 |
| 43,60 | 1 |
| 51,31 | 0 |
| 63,07 | 0 |
| 56,11 | 0 |
| 50,60 | 0 |
| 48,80 | 0 |
| 45,67 | 0 |



|       |   |
|-------|---|
| 52,69 | 0 |
| 34,99 | 1 |
| 70,63 | 0 |
| 58,43 | 0 |
| 62,50 | 0 |
| 30,41 | 0 |
| 51,92 | 0 |
| 61,68 | 0 |
| 46,64 | 0 |
| 54,62 | 0 |
| 49,83 | 0 |
| 70,52 | 0 |
| 29,83 | 0 |
| 44,44 | 0 |
| 37,60 | 0 |
| 57,63 | 0 |
| 82,62 | 0 |
| 50,12 | 0 |
| 30,33 | 0 |
| 44,32 | 0 |
| 58,94 | 0 |
| 59,91 | 1 |
| 42,30 | 0 |
| 40,69 | 0 |
| 40,01 | 0 |
| 59,33 | 0 |
| 41,55 | 0 |
| 24,50 | 0 |
| 47,05 | 0 |
| 29,85 | 0 |
| 68,69 | 0 |
| 43,11 | 0 |
| 45,35 | 0 |
| 85,20 | 0 |
| 40,99 | 0 |
| 54,11 | 0 |
| 40,75 | 0 |
| 38,24 | 0 |
| 51,18 | 0 |
| 33,05 | 0 |
| 59,08 | 0 |
| 30,79 | 0 |
| 44,62 | 0 |
| 42,80 | 0 |
| 40,74 | 0 |
| 82,42 | 0 |
| 57,22 | 0 |
| 46,91 | 0 |
| 57,27 | 0 |
| 61,55 | 0 |
| 30,19 | 0 |
| 33,54 | 0 |
| 60,09 | 0 |
| 52,98 | 0 |
| 44,21 | 0 |
| 59,26 | 0 |
| 47,57 | 0 |
| 41,47 | 0 |
| 46,08 | 0 |

|       |   |
|-------|---|
| 57,29 | 0 |
| 47,28 | 0 |
| 40,16 | 0 |
| 35,32 | 0 |
| 49,92 | 0 |
| 30,15 | 0 |
| 37,04 | 0 |
| 48,62 | 0 |
| 34,75 | 0 |
| 84,23 | 0 |
| 23,70 | 0 |
| 33,89 | 0 |
| 61,92 | 0 |
| 46,43 | 0 |
| 42,19 | 0 |
| 59,05 | 0 |
| 52,34 | 0 |
| 40,13 | 0 |
| 34,91 | 0 |
| 65,09 | 0 |
| 49,94 | 0 |
| 44,06 | 0 |
| 64,92 | 0 |
| 56,57 | 0 |
| 66,88 | 0 |
| 32,95 | 0 |
| 44,86 | 0 |
| 69,82 | 0 |
| 79,20 | 0 |
| 57,66 | 0 |
| 39,36 | 0 |
| 44,58 | 0 |
| 47,17 | 0 |
| 39,77 | 0 |
| 27,14 | 0 |
| 43,57 | 0 |
| 44,72 | 0 |
| 51,31 | 0 |
| 46,79 | 0 |
| 25,99 | 0 |
| 38,38 | 0 |
| 71,44 | 0 |
| 24,05 | 0 |
| 57,66 | 0 |
| 30,51 | 0 |
| 48,09 | 0 |
| 30,27 | 0 |
| 52,28 | 0 |
| 26,15 | 0 |
| 17,35 | 0 |
| 27,28 | 0 |
| 64,09 | 0 |
| 54,06 | 0 |
| 45,02 | 0 |
| 43,81 | 0 |
| 71,91 | 1 |
| 54,74 | 0 |
| 43,67 | 0 |
| 28,24 | 0 |

|       |   |
|-------|---|
| 41,93 | 0 |
| 41,29 | 1 |
| 45,66 | 0 |
| 45,84 | 0 |
| 42,54 | 0 |
| 57,84 | 0 |
| 25,17 | 0 |
| 46,91 | 0 |
| 61,33 | 1 |
| 47,02 | 0 |
| 45,68 | 0 |
| 52,28 | 0 |
| 44,95 | 0 |
| 39,66 | 0 |
| 65,94 | 0 |
| 45,95 | 0 |
| 35,37 | 0 |
| 50,62 | 1 |
| 53,16 | 0 |
| 44,87 | 0 |
| 47,89 | 0 |
| 48,15 | 0 |
| 30,21 | 0 |
| 55,79 | 0 |
| 24,64 | 0 |
| 39,96 | 1 |
| 56,72 | 0 |
| 35,04 | 0 |
| 37,48 | 0 |
| 86,26 | 0 |
| 49,34 | 0 |
| 59,38 | 0 |
| 30,54 | 0 |
| 24,46 | 0 |
| 45,04 | 0 |
| 50,77 | 0 |
| 66,60 | 0 |
| 48,91 | 0 |
| 51,94 | 0 |
| 57,35 | 0 |
| 43,37 | 0 |
| 22,32 | 0 |
| 34,84 | 0 |
| 41,90 | 0 |
| 24,36 | 0 |
| 67,57 | 1 |
| 62,25 | 0 |
| 37,38 | 0 |
| 40,06 | 0 |
| 51,13 | 0 |
| 51,27 | 1 |
| 55,09 | 0 |
| 59,44 | 2 |
| 55,96 | 0 |
| 63,98 | 0 |
| 32,11 | 1 |
| 39,98 | 1 |
| 56,31 | 0 |
| 54,04 | 0 |

|       |   |
|-------|---|
| 82,64 | 0 |
| 52,20 | 0 |
| 40,86 | 0 |
| 61,60 | 0 |
| 42,33 | 1 |
| 35,55 | 0 |
| 52,72 | 0 |
| 55,39 | 0 |
| 34,45 | 1 |
| 34,61 | 0 |
| 83,02 | 1 |
| 28,92 | 0 |
| 73,45 | 0 |
| 39,42 | 0 |
| 26,03 | 0 |
| 76,89 | 0 |
| 51,70 | 0 |
| 48,74 | 0 |
| 64,25 | 0 |
| 17,03 | 1 |
| 44,99 | 0 |
| 56,76 | 0 |
| 41,44 | 0 |
| 38,33 | 0 |
| 33,80 | 0 |
| 41,50 | 0 |
| 59,03 | 1 |
| 42,98 | 0 |
| 32,94 | 0 |
| 66,34 | 1 |
| 43,47 | 0 |
| 34,53 | 1 |
| 45,09 | 1 |
| 88,56 | 0 |
| 38,76 | 0 |
| 29,54 | 0 |
| 46,89 | 0 |
| 41,21 | 1 |
| 31,75 | 1 |
| 27,96 | 0 |
| 79,86 | 0 |
| 45,08 | 0 |
| 53,45 | 0 |
| 35,83 | 0 |
| 40,70 | 0 |
| 62,51 | 0 |
| 46,29 | 0 |
| 56,73 | 0 |
| 45,31 | 0 |
| 49,57 | 0 |
| 48,10 | 0 |
| 22,30 | 1 |
| 32,35 | 1 |
| 39,15 | 0 |
| 48,99 | 1 |
| 48,75 | 0 |
| 46,12 | 0 |
| 33,45 | 1 |
| 20,03 | 1 |

|       |   |
|-------|---|
| 43,29 | 0 |
| 31,66 | 0 |
| 56,79 | 0 |
| 26,92 | 0 |
| 59,59 | 0 |
| 15,67 | 1 |
| 23,54 | 0 |
| 43,90 | 2 |
| 40,41 | 0 |
| 39,28 | 0 |
| 46,80 | 0 |
| 29,87 | 0 |
| 43,58 | 0 |
| 37,52 | 0 |
| 67,73 | 0 |
| 36,28 | 0 |
| 41,88 | 0 |
| 43,50 | 0 |
| 30,65 | 0 |
| 58,69 | 0 |
| 48,24 | 0 |
| 20,43 | 0 |
| 48,16 | 0 |
| 30,47 | 0 |
| 28,77 | 0 |
| 39,98 | 0 |
| 72,00 | 0 |
| 24,30 | 0 |
| 20,61 | 0 |
| 30,28 | 0 |
| 58,85 | 0 |
| 42,50 | 0 |
| 47,96 | 0 |
| 43,17 | 0 |
| 40,71 | 0 |
| 23,90 | 0 |
| 44,28 | 0 |
| 55,98 | 0 |
| 46,64 | 0 |
| 44,10 | 0 |
| 26,91 | 0 |
| 23,62 | 0 |
| 37,94 | 0 |
| 46,82 | 0 |
| 45,40 | 0 |
| 22,47 | 0 |
| 30,89 | 0 |
| 60,96 | 0 |
| 27,12 | 0 |
| 34,76 | 1 |
| 46,11 | 1 |
| 57,56 | 0 |
| 24,66 | 0 |
| 71,70 | 0 |
| 53,90 | 0 |
| 39,60 | 0 |
| 71,00 | 1 |
| 60,60 | 0 |
| 18,28 | 0 |

|       |   |
|-------|---|
| 51,78 | 0 |
| 42,53 | 0 |
| 30,73 | 0 |
| 35,72 | 0 |
| 37,94 | 0 |
| 24,36 | 0 |
| 31,72 | 0 |
| 40,36 | 0 |
| 40,18 | 0 |
| 24,68 | 0 |
| 56,49 | 0 |
| 48,40 | 0 |
| 64,48 | 1 |
| 56,96 | 0 |
| 17,38 | 1 |
| 41,19 | 0 |
| 48,85 | 0 |
| 53,62 | 0 |
| 41,02 | 0 |
| 28,99 | 0 |
| 47,46 | 0 |
| 41,59 | 0 |
| 33,83 | 0 |
| 46,30 | 0 |
| 54,41 | 1 |
| 38,28 | 0 |
| 30,26 | 0 |
| 45,03 | 0 |
| 35,77 | 0 |
| 55,07 | 0 |
| 21,60 | 0 |
| 21,94 | 0 |
| 51,98 | 0 |
| 45,55 | 0 |
| 22,56 | 0 |
| 26,54 | 0 |
| 35,65 | 0 |
| 45,34 | 0 |
| 54,65 | 1 |
| 35,32 | 0 |
| 30,16 | 0 |
| 56,01 | 0 |
| 55,83 | 0 |
| 25,86 | 0 |
| 28,41 | 0 |
| 49,23 | 0 |
| 52,81 | 0 |
| 27,44 | 0 |
| 45,87 | 0 |
| 42,06 | 0 |
| 59,19 | 0 |
| 35,54 | 0 |
| 46,93 | 0 |
| 46,38 | 0 |
| 58,63 | 0 |
| 54,77 | 1 |
| 60,85 | 0 |
| 28,40 | 0 |
| 66,65 | 0 |

|       |   |
|-------|---|
| 59,94 | 0 |
| 26,15 | 0 |
| 43,32 | 0 |
| 67,03 | 0 |
| 29,34 | 0 |
| 60,19 | 0 |
| 29,82 | 0 |
| 22,45 | 0 |
| 57,91 | 0 |
| 98,38 | 0 |
| 72,48 | 0 |
| 37,55 | 1 |
| 30,69 | 1 |
| 26,96 | 0 |
| 56,50 | 0 |
| 39,55 | 1 |
| 35,51 | 0 |
| 73,78 | 0 |
| 53,88 | 0 |
| 32,78 | 0 |
| 40,43 | 0 |
| 20,02 | 0 |
| 52,26 | 0 |
| 31,25 | 0 |
| 47,46 | 0 |
| 48,46 | 0 |
| 52,10 | 0 |
| 26,92 | 1 |
| 30,04 | 0 |
| 41,90 | 0 |
| 40,87 | 0 |
| 47,08 | 0 |
| 27,98 | 0 |
| 33,63 | 0 |
| 44,99 | 0 |
| 22,25 | 1 |
| 35,43 | 1 |
| 27,64 | 0 |
| 38,02 | 0 |
| 59,94 | 0 |
| 21,70 | 1 |
| 51,79 | 0 |
| 35,84 | 0 |
| 39,41 | 0 |
| 33,66 | 0 |
| 34,17 | 0 |
| 39,43 | 0 |
| 67,01 | 0 |
| 50,62 | 0 |
| 37,89 | 0 |
| 22,99 | 0 |
| 45,83 | 0 |
| 30,44 | 0 |
| 63,03 | 0 |
| 54,22 | 0 |
| 40,91 | 0 |
| 41,23 | 1 |
| 8,71  | 2 |
| 25,17 | 0 |

|       |   |
|-------|---|
| 23,82 | 0 |
| 36,15 | 0 |
| 36,12 | 0 |
| 35,62 | 2 |
| 51,81 | 0 |
| 27,19 | 0 |
| 33,72 | 1 |
| 35,57 | 0 |
| 25,23 | 0 |
| 25,70 | 0 |
